# Supplementary material for: An Intronic microRNA Links Rb/E2F and EGFR Signaling
Source: PLoS Genet. 2014 Jul 24;10(7):e1004493. doi: 10.1371/journal.pgen.1004493 (PMC4109884; doi:10.1371/journal.pgen.1004493)
Supplement: Table S1 — The complied list of predicted miR-11, miR-998 and miR-29 targets. (XLSX) [file pgen.1004493.s005.xlsx]

## Sheet: Table S1 miRNA targets
mir11 ALL	mir998 ALL	mir-29		mir-11	mir-11	mir-11	mir-11	mir-11		mir-998	mir-998	mir-998	mir-998	mir-998
FBgn0000018	FBgn0037754	FBgn0030145		miranda	PITA	rnahybrid	targetscan	tscanORF6.2		miranda	PITA	rnahybrid	targetscan	tscanORF6.2
FBgn0000032	FBgn0035229	FBgn0063485		FBgn0020279	FBgn0000492	FBgn0004387	FBgn0000097	FBgn0261787		FBgn0010263	FBgn0010263	FBgn0010263	FBgn0010263	FBgn0037754
FBgn0000037	FBgn0032172	FBgn0013749		FBgn0053523	FBgn0000575	FBgn0020440	FBgn0000338	FBgn0035296		FBgn0034020	FBgn0034020	FBgn0034020	FBgn0034020	FBgn0035229
FBgn0000044	FBgn0026208	FBgn0085402		FBgn0053523	FBgn0000808	FBgn0026083	FBgn0000472	FBgn0031698		FBgn0036875	FBgn0036875	FBgn0036875	FBgn0036875	FBgn0032172
FBgn0000055	FBgn0000032	FBgn0029174		FBgn0029723	FBgn0001108	FBgn0030973	FBgn0000492	FBgn0037363		FBgn0053555	FBgn0053555	FBgn0053555	FBgn0053555	FBgn0026208
FBgn0000056	FBgn0000055	FBgn0034271		FBgn0022710	FBgn0002609	FBgn0031698	FBgn0000575	FBgn0042135		FBgn0037754	FBgn0037754	FBgn0037754	FBgn0002932	FBgn0030053
FBgn0000083	FBgn0000056	FBgn0017558		FBgn0053653	FBgn0002734	FBgn0035041	FBgn0000576	FBgn0000119		FBgn0035229	FBgn0035229	FBgn0035229	FBgn0003448	FBgn0261552
FBgn0000097	FBgn0000152	FBgn0028646		FBgn0035197	FBgn0003117	FBgn0035959	FBgn0000577	FBgn0001337		FBgn0032172	FBgn0032172	FBgn0032172	FBgn0003715	FBgn0260780
FBgn0000099	FBgn0000221	FBgn0030437		FBgn0035198	FBgn0003499	FBgn0035978	FBgn0000591	FBgn0015828		FBgn0026208	FBgn0026208	FBgn0026208	FBgn0004839	FBgn0053519
FBgn0000108	FBgn0000228	FBgn0052843		FBgn0035197	FBgn0003513	FBgn0039489	FBgn0000658	FBgn0028979		FBgn0000032	FBgn0000032	FBgn0000032	FBgn0010328	FBgn0053208
FBgn0000119	FBgn0000257	FBgn0002775		FBgn0035198	FBgn0003720	FBgn0000032	FBgn0000808	FBgn0030266		FBgn0000228	FBgn0000228	FBgn0000228	FBgn0011259	FBgn0052726
FBgn0000142	FBgn0000274	FBgn0004512		FBgn0042182	FBgn0003867	FBgn0000055	FBgn0001297	FBgn0030555		FBgn0000257	FBgn0000257	FBgn0000257	FBgn0011739	FBgn0052574
FBgn0000173	FBgn0000409	FBgn0004513		FBgn0064126	FBgn0004368	FBgn0000056	FBgn0001965	FBgn0032480		FBgn0000274	FBgn0000274	FBgn0000274	FBgn0015772	FBgn0040475
FBgn0000247	FBgn0000451	FBgn0010241		FBgn0042182	FBgn0004370	FBgn0000247	FBgn0002522	FBgn0032956		FBgn0001223	FBgn0001223	FBgn0001223	FBgn0028399	FBgn0039055
FBgn0000251	FBgn0001223	FBgn0035695		FBgn0064126	FBgn0004387	FBgn0000382	FBgn0002592	FBgn0033224		FBgn0001228	FBgn0001228	FBgn0001228	FBgn0028550	FBgn0038816
FBgn0000257	FBgn0001228	FBgn0003328		FBgn0040077	FBgn0004583	FBgn0000473	FBgn0002609	FBgn0033226		FBgn0002887	FBgn0002887	FBgn0002887	FBgn0028670	FBgn0038606
FBgn0000307	FBgn0001291	FBgn0034005		FBgn0040076	FBgn0004646	FBgn0000492	FBgn0002629	FBgn0033667		FBgn0003189	FBgn0003189	FBgn0003189	FBgn0029067	FBgn0037442
FBgn0000338	FBgn0002887	FBgn0034880		FBgn0038683	FBgn0004648	FBgn0000541	FBgn0002631	FBgn0034282		FBgn0003464	FBgn0003464	FBgn0003464	FBgn0031885	FBgn0035586
FBgn0000376	FBgn0002932	FBgn0032949		FBgn0004407	FBgn0004878	FBgn0000581	FBgn0002632	FBgn0034794		FBgn0003638	FBgn0003638	FBgn0003638	FBgn0033495	FBgn0035039
FBgn0000382	FBgn0003189	FBgn0029850		FBgn0064115	FBgn0004956	FBgn0000719	FBgn0002732	FBgn0034976		FBgn0004575	FBgn0004575	FBgn0004575	FBgn0033558	FBgn0034277
FBgn0000384	FBgn0003205	FBgn0015286		FBgn0000055	FBgn0005631	FBgn0000808	FBgn0002734	FBgn0035041		FBgn0004611	FBgn0004611	FBgn0004611	FBgn0035321	FBgn0034157
FBgn0000414	FBgn0003227	FBgn0028579		FBgn0000056	FBgn0005658	FBgn0001108	FBgn0003261	FBgn0035591		FBgn0004643	FBgn0004643	FBgn0004643	FBgn0037482	FBgn0033639
FBgn0000416	FBgn0003231	FBgn0052196		FBgn0067895	FBgn0005771	FBgn0001189	FBgn0003300	FBgn0036660		FBgn0010414	FBgn0010414	FBgn0010414	FBgn0038438	FBgn0033402
FBgn0000448	FBgn0003448	FBgn0032222		FBgn0026749	FBgn0010109	FBgn0001319	FBgn0003382	FBgn0036888		FBgn0011335	FBgn0011335	FBgn0011335	FBgn0003984	FBgn0032284
FBgn0000449	FBgn0003464	FBgn0002566		FBgn0030522	FBgn0010223	FBgn0001941	FBgn0003390	FBgn0037116		FBgn0012049	FBgn0012049	FBgn0012049	FBgn0004511	FBgn0031201
FBgn0000472	FBgn0003638	FBgn0038747		FBgn0031285	FBgn0010452	FBgn0002609	FBgn0003499	FBgn0039203		FBgn0015321	FBgn0015321	FBgn0015321	FBgn0004580	FBgn0030747
FBgn0000473	FBgn0003715	FBgn0038984		FBgn0040508	FBgn0011591	FBgn0002887	FBgn0003513	FBgn0039738		FBgn0017397	FBgn0017397	FBgn0017397	FBgn0035087	FBgn0030719
FBgn0000492	FBgn0003944	FBgn0031489		FBgn0028428	FBgn0011746	FBgn0003015	FBgn0003720	FBgn0042094		FBgn0019925	FBgn0019925	FBgn0019925	FBgn0039852	FBgn0030672
FBgn0000497	FBgn0004118	FBgn0034800		FBgn0020372	FBgn0013948	FBgn0003089	FBgn0003742	FBgn0051140		FBgn0022085	FBgn0022085	FBgn0022085	FBgn0050147	FBgn0030511
FBgn0000520	FBgn0004368	FBgn0039464		FBgn0013718	FBgn0015766	FBgn0003091	FBgn0003867	FBgn0051531		FBgn0024889	FBgn0024889	FBgn0024889	FBgn0086758	FBgn0030509
FBgn0000524	FBgn0004456	FBgn0026063		FBgn0040280	FBgn0015904	FBgn0003117	FBgn0004143	FBgn0051729		FBgn0025641	FBgn0025641	FBgn0025641	FBgn0001250	FBgn0030114
FBgn0000535	FBgn0004575	FBgn0026064		FBgn0260451	FBgn0015919	FBgn0003205	FBgn0004197	FBgn0085408		FBgn0025720	FBgn0025720	FBgn0025720	FBgn0030788	FBgn0029504
FBgn0000541	FBgn0004587	FBgn0260934		FBgn0031671	FBgn0016047	FBgn0003300	FBgn0004364	FBgn0261794		FBgn0026875	FBgn0026875	FBgn0026875	FBgn0036814	FBgn0028375
FBgn0000564	FBgn0004611	FBgn0026189		FBgn0260470	FBgn0016081	FBgn0003339	FBgn0004368	FBgn0037808		FBgn0028658	FBgn0028658	FBgn0028658	FBgn0000241	FBgn0028336
FBgn0000575	FBgn0004643	FBgn0015754		FBgn0031885	FBgn0020445	FBgn0003386	FBgn0004387	FBgn0000520		FBgn0029173	FBgn0029173	FBgn0029173	FBgn0029092	FBgn0027527
FBgn0000576	FBgn0004839	FBgn0035420		FBgn0259176	FBgn0020493	FBgn0003390	FBgn0004449	FBgn0004390		FBgn0030101	FBgn0030101	FBgn0030101	FBgn0029573	FBgn0024230
FBgn0000577	FBgn0010263	FBgn0037026		FBgn0086711	FBgn0021764	FBgn0003396	FBgn0004579	FBgn0030843		FBgn0030528	FBgn0030528	FBgn0030528	FBgn0029657	FBgn0021818
FBgn0000581	FBgn0010328	FBgn0005558		FBgn0058006	FBgn0022201	FBgn0003462	FBgn0004583	FBgn0034068		FBgn0030797	FBgn0030797	FBgn0030797	FBgn0030249	FBgn0020279
FBgn0000591	FBgn0010414	FBgn0019650		FBgn0000384	FBgn0025624	FBgn0003464	FBgn0004635	FBgn0039727		FBgn0030997	FBgn0030997	FBgn0030997	FBgn0031367	FBgn0019990
FBgn0000625	FBgn0010575	FBgn0033918		FBgn0058005	FBgn0026173	FBgn0003499	FBgn0004862	FBgn0024252		FBgn0031995	FBgn0031995	FBgn0031995	FBgn0031550	FBgn0015907
FBgn0000658	FBgn0011239	FBgn0036004		FBgn0040056	FBgn0026634	FBgn0003513	FBgn0004863	FBgn0000535		FBgn0032310	FBgn0032310	FBgn0032310	FBgn0031725	FBgn0010909
FBgn0000719	FBgn0011259	FBgn0259110		FBgn0058053	FBgn0027321	FBgn0003720	FBgn0004878	FBgn0085370		FBgn0033473	FBgn0033473	FBgn0033473	FBgn0031737	FBgn0004656
FBgn0000808	FBgn0011270	FBgn0024836		FBgn0083949	FBgn0027342	FBgn0003866	FBgn0004956	FBgn0037770		FBgn0034792	FBgn0034792	FBgn0034792	FBgn0034810	FBgn0004394
FBgn0001108	FBgn0011335	FBgn0042696		FBgn0083963	FBgn0027562	FBgn0003867	FBgn0005631	FBgn0014135		FBgn0034978	FBgn0034978	FBgn0034978	FBgn0035697	FBgn0000414
FBgn0001189	FBgn0011739	FBgn0035851		FBgn0259227	FBgn0028428	FBgn0003888	FBgn0005658	FBgn0010280		FBgn0034979	FBgn0034979	FBgn0034979	FBgn0038351	FBgn0000247
FBgn0001223	FBgn0011828	FBgn0035895		FBgn0051163	FBgn0028985	FBgn0003889	FBgn0005660	FBgn0036341		FBgn0035001	FBgn0035001	FBgn0035001	FBgn0039214	FBgn0003870
FBgn0001228	FBgn0012049	FBgn0034989		FBgn0260467	FBgn0029082	FBgn0004242	FBgn0005771	FBgn0261836		FBgn0035092	FBgn0035092	FBgn0035092	FBgn0039281
FBgn0001296	FBgn0013746	FBgn0002891		FBgn0038949	FBgn0029088	FBgn0004368	FBgn0010109	FBgn0010741		FBgn0035348	FBgn0035348	FBgn0035348	FBgn0039688
FBgn0001297	FBgn0014002	FBgn0086368		FBgn0083967	FBgn0029779	FBgn0004370	FBgn0010223	FBgn0022768		FBgn0037134	FBgn0037134	FBgn0037134	FBgn0053472
FBgn0001319	FBgn0014469	FBgn0035251		FBgn0039209	FBgn0029820	FBgn0004407	FBgn0010452	FBgn0035648		FBgn0037307	FBgn0037307	FBgn0037307	FBgn0085253
FBgn0001337	FBgn0014869	FBgn0030646		FBgn0040397	FBgn0029932	FBgn0004583	FBgn0011204	FBgn0038606		FBgn0038033	FBgn0038033	FBgn0038033	FBgn0085383
FBgn0001404	FBgn0015321	FBgn0032600		FBgn0085373	FBgn0029944	FBgn0004648	FBgn0011591	FBgn0053531		FBgn0038679	FBgn0038679	FBgn0038679	FBgn0085384
FBgn0001624	FBgn0015772	FBgn0003334		FBgn0030161	FBgn0030928	FBgn0004878	FBgn0011706	FBgn0037109		FBgn0038917	FBgn0038917	FBgn0038917	FBgn0085392
FBgn0001941	FBgn0015777	FBgn0029837		FBgn0053542	FBgn0031220	FBgn0004919	FBgn0011740	FBgn0039644		FBgn0039141	FBgn0039141	FBgn0039141	FBgn0085412
FBgn0001965	FBgn0017397	FBgn0030701		FBgn0004956	FBgn0031397	FBgn0004956	FBgn0011746	FBgn0032856		FBgn0039158	FBgn0039158	FBgn0039158	FBgn0030181
FBgn0001977	FBgn0019925	FBgn0033226		FBgn0031528	FBgn0031812	FBgn0005631	FBgn0012034	FBgn0004387		FBgn0040212	FBgn0040212	FBgn0040212
FBgn0002121	FBgn0020235	FBgn0032475		FBgn0031760	FBgn0031817	FBgn0005658	FBgn0013948	FBgn0034240		FBgn0043070	FBgn0043070	FBgn0043070
FBgn0002306	FBgn0020381	FBgn0032744		FBgn0085374	FBgn0031885	FBgn0005771	FBgn0013983	FBgn0003715		FBgn0050033	FBgn0050033	FBgn0050033
FBgn0002522	FBgn0020439	FBgn0030502		FBgn0031880	FBgn0031898	FBgn0008654	FBgn0014010	FBgn0004625		FBgn0050071	FBgn0050071	FBgn0050071
FBgn0002592	FBgn0020440	FBgn0033015		FBgn0003502	FBgn0031998	FBgn0010109	FBgn0014859	FBgn0010269		FBgn0050497	FBgn0050497	FBgn0050497
FBgn0002609	FBgn0020493	FBgn0027085		FBgn0032079	FBgn0032120	FBgn0010113	FBgn0015221	FBgn0016977		FBgn0051530	FBgn0051530	FBgn0051530
FBgn0002629	FBgn0022085	FBgn0036128		FBgn0085424	FBgn0032469	FBgn0010223	FBgn0015766	FBgn0023441		FBgn0052662	FBgn0052662	FBgn0052662
FBgn0002631	FBgn0023023	FBgn0052072		FBgn0050015	FBgn0032694	FBgn0010314	FBgn0015904	FBgn0025836		FBgn0053197	FBgn0053197	FBgn0053197
FBgn0002632	FBgn0023530	FBgn0031759		FBgn0085261	FBgn0033159	FBgn0010383	FBgn0015919	FBgn0026566		FBgn0066304	FBgn0066304	FBgn0066304
FBgn0002709	FBgn0024184	FBgn0016693		FBgn0085408	FBgn0033347	FBgn0010452	FBgn0015924	FBgn0028962		FBgn0067783	FBgn0067783	FBgn0067783
FBgn0002723	FBgn0024889	FBgn0026876		FBgn0003091	FBgn0033441	FBgn0011204	FBgn0016053	FBgn0028965		FBgn0085347	FBgn0085347	FBgn0085347
FBgn0002732	FBgn0024957	FBgn0033762		FBgn0034509	FBgn0033473	FBgn0011259	FBgn0016059	FBgn0031820		FBgn0243505	FBgn0243505	FBgn0243505
FBgn0002734	FBgn0025394	FBgn0015360		FBgn0016053	FBgn0033799	FBgn0011570	FBgn0016131	FBgn0035688		FBgn0260453	FBgn0260453	FBgn0260453
FBgn0002774	FBgn0025632	FBgn0039302		FBgn0085294	FBgn0034045	FBgn0011591	FBgn0020445	FBgn0035811		FBgn0260454	FBgn0260454	FBgn0260454
FBgn0002775	FBgn0025641	FBgn0003896		FBgn0085300	FBgn0034378	FBgn0011666	FBgn0020493	FBgn0035825		FBgn0260474	FBgn0260474	FBgn0260474
FBgn0002781	FBgn0025720	FBgn0051064		FBgn0086708	FBgn0034490	FBgn0011672	FBgn0021764	FBgn0037094		FBgn0260499	FBgn0260499	FBgn0260499
FBgn0002873	FBgn0025814	FBgn0034970		FBgn0004449	FBgn0034634	FBgn0011676	FBgn0022063	FBgn0037895		FBgn0260934	FBgn0260934	FBgn0260934
FBgn0002887	FBgn0026255	FBgn0033983		FBgn0037872	FBgn0034741	FBgn0011746	FBgn0022201	FBgn0052647		FBgn0261259	FBgn0261259	FBgn0261259
FBgn0002906	FBgn0026257	FBgn0037734		FBgn0037872	FBgn0034802	FBgn0011764	FBgn0022710	FBgn0085434		FBgn0261285	FBgn0261285	FBgn0261285
FBgn0002931	FBgn0026598	FBgn0016070		FBgn0051342	FBgn0034887	FBgn0013948	FBgn0022764	FBgn0053208		FBgn0261444	FBgn0261444	FBgn0261444
FBgn0002932	FBgn0026875	FBgn0020270		FBgn0038286	FBgn0035398	FBgn0014009	FBgn0023097	FBgn0032467		FBgn0261563	FBgn0261563	FBgn0261563
FBgn0002939	FBgn0027358	FBgn0030734		FBgn0039054	FBgn0035610	FBgn0014343	FBgn0023416	FBgn0038295		FBgn0263289	FBgn0263289	FBgn0263289
FBgn0003002	FBgn0027548	FBgn0037498		FBgn0085318	FBgn0035953	FBgn0014865	FBgn0023545	FBgn0027280		FBgn0034451	FBgn0034451	FBgn0002932
FBgn0003015	FBgn0028399	FBgn0035771		FBgn0051092	FBgn0035959	FBgn0015221	FBgn0024250	FBgn0005630		FBgn0003227	FBgn0002932	FBgn0003448
FBgn0003044	FBgn0028550	FBgn0036623		FBgn0085322	FBgn0036446	FBgn0015278	FBgn0024315	FBgn0030747		FBgn0003944	FBgn0003448	FBgn0003715
FBgn0003089	FBgn0028658	FBgn0004394		FBgn0085586	FBgn0036485	FBgn0015371	FBgn0024365	FBgn0032170		FBgn0004587	FBgn0003715	FBgn0004839
FBgn0003091	FBgn0028670	FBgn0085424		FBgn0001941	FBgn0036505	FBgn0015766	FBgn0025624	FBgn0034046		FBgn0010575	FBgn0004839	FBgn0010328
FBgn0003117	FBgn0029067	FBgn0031534		FBgn0085424	FBgn0036665	FBgn0015844	FBgn0025645	FBgn0034527		FBgn0011239	FBgn0010328	FBgn0011259
FBgn0003130	FBgn0029173	FBgn0039902		FBgn0003117	FBgn0036741	FBgn0015904	FBgn0026173	FBgn0035229		FBgn0011828	FBgn0011259	FBgn0011739
FBgn0003139	FBgn0029764	FBgn0011747		FBgn0003319	FBgn0036939	FBgn0015919	FBgn0026592	FBgn0038110		FBgn0014002	FBgn0011739	FBgn0015772
FBgn0003205	FBgn0030101	FBgn0085445		FBgn0003513	FBgn0037391	FBgn0016047	FBgn0027321	FBgn0028274		FBgn0015777	FBgn0015772	FBgn0028399
FBgn0003227	FBgn0030327	FBgn0260937		FBgn0004364	FBgn0037646	FBgn0016059	FBgn0027342	FBgn0037368		FBgn0020235	FBgn0028399	FBgn0028550
FBgn0003231	FBgn0030528	FBgn0028494		FBgn0004583	FBgn0037663	FBgn0016081	FBgn0027538	FBgn0051224		FBgn0020381	FBgn0028550	FBgn0028670
FBgn0003261	FBgn0030740	FBgn0016794		FBgn0004873	FBgn0037736	FBgn0016685	FBgn0027539	FBgn0022787		FBgn0020439	FBgn0028670	FBgn0029067
FBgn0003300	FBgn0030797	FBgn0259111		FBgn0005771	FBgn0037956	FBgn0016700	FBgn0027558	FBgn0051643		FBgn0026598	FBgn0029067	FBgn0031885
FBgn0003319	FBgn0030997	FBgn0036484		FBgn0010109	FBgn0037972	FBgn0016978	FBgn0027562	FBgn0037606		FBgn0027358	FBgn0031885	FBgn0033495
FBgn0003339	FBgn0031022	FBgn0030071		FBgn0010314	FBgn0038058	FBgn0020279	FBgn0027593	FBgn0041604		FBgn0029764	FBgn0033495	FBgn0033558
FBgn0003371	FBgn0031188	FBgn0034362		FBgn0000251	FBgn0038139	FBgn0020309	FBgn0027788	FBgn0035090		FBgn0030327	FBgn0033558	FBgn0035321
FBgn0003382	FBgn0031356	FBgn0034363		FBgn0010422	FBgn0038463	FBgn0020381	FBgn0028428	FBgn0015772		FBgn0031356	FBgn0035321	FBgn0037482
FBgn0003386	FBgn0031395	FBgn0004397		FBgn0011746	FBgn0038652	FBgn0020407	FBgn0028915	FBgn0039068		FBgn0031652	FBgn0037482	FBgn0038438
FBgn0003390	FBgn0031652	FBgn0003719		FBgn0015838	FBgn0038683	FBgn0020445	FBgn0028938	FBgn0036735		FBgn0033159	FBgn0038438	FBgn0000055
FBgn0003396	FBgn0031752	FBgn0004885		FBgn0020381	FBgn0038745	FBgn0020493	FBgn0028999	FBgn0053214		FBgn0034135	FBgn0000055	FBgn0000056
FBgn0003423	FBgn0031885	FBgn0032340		FBgn0020493	FBgn0038752	FBgn0020521	FBgn0029082	FBgn0021768		FBgn0034716	FBgn0000056	FBgn0000152
FBgn0003462	FBgn0031995	FBgn0031549		FBgn0021764	FBgn0038761	FBgn0021764	FBgn0029088	FBgn0034307		FBgn0034731	FBgn0000152	FBgn0000221
FBgn0003464	FBgn0032051	FBgn0039045		FBgn0023083	FBgn0038762	FBgn0022201	FBgn0029114	FBgn0039283		FBgn0035432	FBgn0000221	FBgn0000451
FBgn0003495	FBgn0032176	FBgn0261394		FBgn0023388	FBgn0038815	FBgn0023521	FBgn0029123	FBgn0033257		FBgn0035486	FBgn0000451	FBgn0001291
FBgn0003499	FBgn0032310	FBgn0261395		FBgn0000492	FBgn0039209	FBgn0024182	FBgn0029662	FBgn0261565		FBgn0036576	FBgn0001291	FBgn0003205
FBgn0003502	FBgn0032656	FBgn0051953		FBgn0024958	FBgn0039246	FBgn0024251	FBgn0029726	FBgn0030141		FBgn0036597	FBgn0003205	FBgn0003231
FBgn0003513	FBgn0032673	FBgn0260817		FBgn0025802	FBgn0039594	FBgn0024365	FBgn0029828	FBgn0030576		FBgn0036725	FBgn0003231	FBgn0004118
FBgn0003545	FBgn0032783	FBgn0038617		FBgn0026598	FBgn0039696	FBgn0025549	FBgn0029846	FBgn0035959		FBgn0037921	FBgn0004118	FBgn0004368
FBgn0003638	FBgn0032857	FBgn0030808		FBgn0026619	FBgn0039799	FBgn0025624	FBgn0029891	FBgn0001296		FBgn0037924	FBgn0004368	FBgn0004456
FBgn0003654	FBgn0032894	FBgn0039589		FBgn0000658	FBgn0039908	FBgn0025802	FBgn0029912	FBgn0260938		FBgn0037942	FBgn0004456	FBgn0011270
FBgn0003715	FBgn0033159	FBgn0041210		FBgn0000055	FBgn0041094	FBgn0026136	FBgn0029932	FBgn0035793		FBgn0040755	FBgn0011270	FBgn0013746
FBgn0003720	FBgn0033274	FBgn0052113		FBgn0000056	FBgn0041160	FBgn0026173	FBgn0029944	FBgn0033638		FBgn0042174	FBgn0013746	FBgn0014469
FBgn0003742	FBgn0033388	FBgn0000114		FBgn0000808	FBgn0043070	FBgn0026320	FBgn0029979	FBgn0003002		FBgn0058002	FBgn0014469	FBgn0014869
FBgn0003744	FBgn0033473	FBgn0043904		FBgn0000459	FBgn0043364	FBgn0026438	FBgn0030085	FBgn0086708		FBgn0061469	FBgn0014869	FBgn0020493
FBgn0003748	FBgn0033495	FBgn0004875		FBgn0004598	FBgn0045064	FBgn0026577	FBgn0030090	FBgn0052264		FBgn0067903	FBgn0020493	FBgn0023023
FBgn0003862	FBgn0033501	FBgn0038341		FBgn0003300	FBgn0051163	FBgn0026598	FBgn0030161	FBgn0030286		FBgn0260450	FBgn0023023	FBgn0023530
FBgn0003866	FBgn0033512	FBgn0003660		FBgn0028645	FBgn0051849	FBgn0026634	FBgn0030281	FBgn0260966		FBgn0260455	FBgn0023530	FBgn0024184
FBgn0003867	FBgn0033558	FBgn0013342		FBgn0032694	FBgn0051871	FBgn0027339	FBgn0030452	FBgn0053182		FBgn0002932	FBgn0024184	FBgn0024957
FBgn0003870	FBgn0033869	FBgn0003068		FBgn0003866	FBgn0052085	FBgn0027342	FBgn0030627	FBgn0033984		FBgn0003448	FBgn0024957	FBgn0025632
FBgn0003888	FBgn0033954	FBgn0259174		FBgn0000473	FBgn0052091	FBgn0027539	FBgn0030826	FBgn0034959		FBgn0003715	FBgn0025632	FBgn0025814
FBgn0003889	FBgn0034020	FBgn0002528		FBgn0027788	FBgn0052653	FBgn0027562	FBgn0030884	FBgn0037766		FBgn0004839	FBgn0025814	FBgn0026255
FBgn0003891	FBgn0034135	FBgn0031871		FBgn0004435	FBgn0053959	FBgn0028428	FBgn0030892	FBgn0050035		FBgn0010328	FBgn0026255	FBgn0026257
FBgn0003963	FBgn0034451	FBgn0029713		FBgn0033799	FBgn0064115	FBgn0028985	FBgn0030904	FBgn0034110		FBgn0011259	FBgn0026257	FBgn0027548
FBgn0003964	FBgn0034716	FBgn0023489		FBgn0014865	FBgn0085424	FBgn0029082	FBgn0030928	FBgn0035677		FBgn0011739	FBgn0027548	FBgn0030740
FBgn0003997	FBgn0034731	FBgn0029504		FBgn0020236	FBgn0085442	FBgn0029088	FBgn0031098	FBgn0015402		FBgn0015772	FBgn0030740	FBgn0031022
FBgn0004002	FBgn0034792	FBgn0017453		FBgn0016701	FBgn0086358	FBgn0029175	FBgn0031384	FBgn0027506		FBgn0028399	FBgn0031022	FBgn0031188
FBgn0004118	FBgn0034919	FBgn0030748		FBgn0026173		FBgn0029702	FBgn0031397	FBgn0037734		FBgn0028550	FBgn0031188	FBgn0031395
FBgn0004133	FBgn0034978	FBgn0035625		FBgn0020440		FBgn0029820	FBgn0031428	FBgn0051481		FBgn0028670	FBgn0031395	FBgn0031752
FBgn0004143	FBgn0034979	FBgn0030746		FBgn0000157		FBgn0029837	FBgn0031449	FBgn0260634		FBgn0029067	FBgn0031752	FBgn0032051
FBgn0004197	FBgn0035001	FBgn0030747		FBgn0000575		FBgn0029849	FBgn0031474	FBgn0085395		FBgn0031885	FBgn0032051	FBgn0032656
FBgn0004198	FBgn0035092	FBgn0086357		FBgn0002775		FBgn0029932	FBgn0031528	FBgn0031734		FBgn0033495	FBgn0032656	FBgn0032673
FBgn0004227	FBgn0035148	FBgn0005536		FBgn0015793		FBgn0029944	FBgn0031760	FBgn0040297		FBgn0033558	FBgn0032673	FBgn0032783
FBgn0004242	FBgn0035228	FBgn0004624		FBgn0026404		FBgn0029979	FBgn0031770	FBgn0036732		FBgn0035321	FBgn0032783	FBgn0032857
FBgn0004364	FBgn0035321	FBgn0039306		FBgn0000625		FBgn0030089	FBgn0031812	FBgn0261823		FBgn0037482	FBgn0032857	FBgn0032894
FBgn0004368	FBgn0035348	FBgn0004395		FBgn0015904		FBgn0030208	FBgn0031817	FBgn0011225		FBgn0038438	FBgn0032894	FBgn0033388
FBgn0004369	FBgn0035432	FBgn0038953		FBgn0015919		FBgn0030289	FBgn0031858	FBgn0020762		FBgn0000055	FBgn0033388	FBgn0033501
FBgn0004370	FBgn0035486	FBgn0025593		FBgn0014343		FBgn0030299	FBgn0031885	FBgn0027589		FBgn0000056	FBgn0033501	FBgn0033512
FBgn0004387	FBgn0035627	FBgn0033214		FBgn0010452		FBgn0030323	FBgn0031914	FBgn0034853		FBgn0000152	FBgn0033512	FBgn0033954
FBgn0004390	FBgn0036317	FBgn0033215		FBgn0001108		FBgn0030330	FBgn0031927	FBgn0035186		FBgn0000221	FBgn0033954	FBgn0034919
FBgn0004395	FBgn0036463	FBgn0033216		FBgn0017572		FBgn0030345	FBgn0031948	FBgn0036569		FBgn0000451	FBgn0034919	FBgn0035627
FBgn0004407	FBgn0036469	FBgn0029878		FBgn0010223		FBgn0030351	FBgn0031979	FBgn0039890		FBgn0001291	FBgn0035627	FBgn0036317
FBgn0004435	FBgn0036576	FBgn0010501		FBgn0036786		FBgn0030411	FBgn0031998	FBgn0040071		FBgn0003205	FBgn0036317	FBgn0036640
FBgn0004449	FBgn0036597	FBgn0019972		FBgn0011591		FBgn0030482	FBgn0032079	FBgn0053969		FBgn0003231	FBgn0036640	FBgn0036838
FBgn0004456	FBgn0036640	FBgn0028381		FBgn0022936		FBgn0030485	FBgn0032116	FBgn0053970		FBgn0004118	FBgn0036838	FBgn0036910
FBgn0004509	FBgn0036725	FBgn0051534		FBgn0014362		FBgn0030528	FBgn0032120	FBgn0016070		FBgn0004368	FBgn0036910	FBgn0037057
FBgn0004554	FBgn0036838	FBgn0039431		FBgn0003261		FBgn0030613	FBgn0032123	FBgn0003371		FBgn0004456	FBgn0037057	FBgn0037217
FBgn0004579	FBgn0036875	FBgn0051550		FBgn0010282		FBgn0030680	FBgn0032166	FBgn0031636		FBgn0011270	FBgn0037217	FBgn0037293
FBgn0004583	FBgn0036910	FBgn0011291		FBgn0004175		FBgn0030703	FBgn0032358	FBgn0039489		FBgn0013746	FBgn0037293	FBgn0037742
FBgn0004587	FBgn0037057	FBgn0083962		FBgn0003889		FBgn0030743	FBgn0032469	FBgn0039740		FBgn0014469	FBgn0037742	FBgn0037917
FBgn0004593	FBgn0037134	FBgn0023514		FBgn0002906		FBgn0030890	FBgn0032538	FBgn0051530		FBgn0014869	FBgn0037917	FBgn0037994
FBgn0004598	FBgn0037217	FBgn0040340		FBgn0037933		FBgn0030894	FBgn0032684	FBgn0026083		FBgn0020493	FBgn0037994	FBgn0038516
FBgn0004603	FBgn0037293	FBgn0032514		FBgn0026634		FBgn0030926	FBgn0032688	FBgn0034421		FBgn0023023	FBgn0038516	FBgn0038840
FBgn0004611	FBgn0037307	FBgn0016977		FBgn0086370		FBgn0030928	FBgn0032694	FBgn0017418		FBgn0023530	FBgn0038840	FBgn0039107
FBgn0004625	FBgn0037482	FBgn0024326		FBgn0025456		FBgn0030932	FBgn0032713	FBgn0004509		FBgn0024184	FBgn0039107	FBgn0039157
FBgn0004635	FBgn0037636	FBgn0037093		FBgn0003499		FBgn0031065	FBgn0032865	FBgn0031498		FBgn0024957	FBgn0039157	FBgn0039207
FBgn0004646	FBgn0037742	FBgn0000479		FBgn0028468		FBgn0031119	FBgn0033121	FBgn0031804		FBgn0025632	FBgn0039207	FBgn0039339
FBgn0004648	FBgn0037917	FBgn0024806		FBgn0003867		FBgn0031139	FBgn0033232	FBgn0045035		FBgn0025814	FBgn0039339	FBgn0039347
FBgn0004655	FBgn0037921	FBgn0035532		FBgn0015795		FBgn0031144	FBgn0033259	FBgn0030838		FBgn0026255	FBgn0039347	FBgn0039789
FBgn0004777	FBgn0037924	FBgn0031955		FBgn0015240		FBgn0031220	FBgn0033288	FBgn0002723		FBgn0026257	FBgn0039789	FBgn0040344
FBgn0004779	FBgn0037942	FBgn0044452		FBgn0002734		FBgn0031397	FBgn0033347	FBgn0011710		FBgn0027548	FBgn0040344	FBgn0043002
FBgn0004797	FBgn0037994	FBgn0000171		FBgn0002592		FBgn0031490	FBgn0033355	FBgn0024230		FBgn0030740	FBgn0043002	FBgn0051010
FBgn0004834	FBgn0038033	FBgn0003071		FBgn0002609		FBgn0031590	FBgn0033356	FBgn0261555		FBgn0031022	FBgn0051010	FBgn0051313
FBgn0004855	FBgn0038438	FBgn0260966		FBgn0002631		FBgn0031747	FBgn0033382	FBgn0003862		FBgn0031188	FBgn0051313	FBgn0051712
FBgn0004862	FBgn0038516	FBgn0013753		FBgn0008649		FBgn0031779	FBgn0033392	FBgn0027951		FBgn0031395	FBgn0051712	FBgn0052442
FBgn0004863	FBgn0038679	FBgn0013755		FBgn0004387		FBgn0031801	FBgn0033524	FBgn0032821		FBgn0031752	FBgn0052442	FBgn0052791
FBgn0004873	FBgn0038840	FBgn0005592		FBgn0003720		FBgn0031812	FBgn0033589	FBgn0033465		FBgn0032051	FBgn0052791	FBgn0053126
FBgn0004875	FBgn0038917	FBgn0010389		FBgn0000416		FBgn0031817	FBgn0033707	FBgn0033607		FBgn0032656	FBgn0053126	FBgn0062413
FBgn0004878	FBgn0039107	FBgn0259178		FBgn0039904		FBgn0031885	FBgn0033728	FBgn0038853		FBgn0032673	FBgn0062413	FBgn0086902
FBgn0004919	FBgn0039141	FBgn0038454		FBgn0004878		FBgn0031897	FBgn0033731	FBgn0083940		FBgn0032783	FBgn0086902	FBgn0259736
FBgn0004921	FBgn0039157	FBgn0036511		FBgn0015663		FBgn0031971	FBgn0033772	FBgn0083954		FBgn0032857	FBgn0259736	FBgn0260451
FBgn0004956	FBgn0039158	FBgn0259141		FBgn0020377		FBgn0031979	FBgn0033799	FBgn0038603		FBgn0032894	FBgn0260451	FBgn0260470
FBgn0005410	FBgn0039207	FBgn0259232		FBgn0026369		FBgn0031998	FBgn0033943	FBgn0020440		FBgn0033388	FBgn0260470	FBgn0003227
FBgn0005427	FBgn0039339	FBgn0261046		FBgn0028979		FBgn0032116	FBgn0034032	FBgn0035199		FBgn0033501	FBgn0036469	FBgn0003944
FBgn0005536	FBgn0039347	FBgn0001203		FBgn0029088		FBgn0032120	FBgn0034045	FBgn0035454		FBgn0033512	FBgn0003984	FBgn0004587
FBgn0005561	FBgn0039789	FBgn0035464		FBgn0029114		FBgn0032262	FBgn0034083	FBgn0000307		FBgn0033954	FBgn0004511	FBgn0010575
FBgn0005590	FBgn0040030	FBgn0025382		FBgn0004198		FBgn0032283	FBgn0034094	FBgn0004875		FBgn0034919	FBgn0004580	FBgn0011239
FBgn0005619	FBgn0040212	FBgn0000119		FBgn0259938		FBgn0032310	FBgn0034181	FBgn0037442		FBgn0035627	FBgn0035087	FBgn0011828
FBgn0005630	FBgn0040344	FBgn0259823		FBgn0000018		FBgn0032314	FBgn0034355	FBgn0001404		FBgn0036317	FBgn0039852	FBgn0014002
FBgn0005631	FBgn0040755	FBgn0260432		FBgn0001332		FBgn0032358	FBgn0034378	FBgn0030973		FBgn0036640	FBgn0050147	FBgn0015777
FBgn0005658	FBgn0042174	FBgn0030787		FBgn0000395		FBgn0032455	FBgn0034389	FBgn0003044		FBgn0036838	FBgn0086758	FBgn0020235
FBgn0005660	FBgn0043002	FBgn0020251		FBgn0016047		FBgn0032469	FBgn0034484	FBgn0038816		FBgn0036910	FBgn0030053	FBgn0020381
FBgn0005771	FBgn0043070	FBgn0000330		FBgn0010019		FBgn0032618	FBgn0034490	FBgn0031681		FBgn0037057	FBgn0000044	FBgn0020439
FBgn0008654	FBgn0043854	FBgn0010341		FBgn0004648		FBgn0032656	FBgn0034540	FBgn0033478		FBgn0037217	FBgn0000045	FBgn0026598
FBgn0010019	FBgn0050033	FBgn0259214		FBgn0004655		FBgn0032694	FBgn0034541	FBgn0004611		FBgn0037293	FBgn0000047	FBgn0027358
FBgn0010109	FBgn0050071	FBgn0010909		FBgn0000472		FBgn0032867	FBgn0034639	FBgn0039905		FBgn0037742	FBgn0000117	FBgn0029764
FBgn0010113	FBgn0050497	FBgn0036446		FBgn0004368		FBgn0032878	FBgn0034741	FBgn0003130		FBgn0037917	FBgn0000210	FBgn0030327
FBgn0010223	FBgn0051010	FBgn0030945		FBgn0040487		FBgn0032894	FBgn0034753	FBgn0037142		FBgn0037994	FBgn0000338	FBgn0031356
FBgn0010269	FBgn0051313	FBgn0051453		FBgn0004956		FBgn0033159	FBgn0034784	FBgn0052627		FBgn0038516	FBgn0000363	FBgn0031652
FBgn0010280	FBgn0051530	FBgn0028978		FBgn0034521		FBgn0033177	FBgn0034802	FBgn0002306		FBgn0038840	FBgn0000463	FBgn0033159
FBgn0010300	FBgn0051712	FBgn0027950		FBgn0002873		FBgn0033188	FBgn0034861	FBgn0035942		FBgn0039107	FBgn0000565	FBgn0034135
FBgn0010303	FBgn0052161	FBgn0000273		FBgn0011764		FBgn0033244	FBgn0034903	FBgn0020306		FBgn0039157	FBgn0001168	FBgn0034716
FBgn0010314	FBgn0052442	FBgn0037897		FBgn0022201		FBgn0033269	FBgn0034911	FBgn0085428		FBgn0039207	FBgn0001235	FBgn0034731
FBgn0010383	FBgn0052662	FBgn0261283		FBgn0040359		FBgn0033337	FBgn0034997	FBgn0027505		FBgn0039339	FBgn0002577	FBgn0035432
FBgn0010424	FBgn0052791	FBgn0041111		FBgn0023521		FBgn0033342	FBgn0035010	FBgn0035978		FBgn0039347	FBgn0002733	FBgn0035486
FBgn0010431	FBgn0053126	FBgn0036980		FBgn0023545		FBgn0033347	FBgn0035023	FBgn0261259		FBgn0039789	FBgn0002774	FBgn0036576
FBgn0010441	FBgn0053197	FBgn0040283		FBgn0025624		FBgn0033356	FBgn0035101	FBgn0031473		FBgn0040344	FBgn0002863	FBgn0036597
FBgn0010452	FBgn0053555	FBgn0030505		FBgn0029723		FBgn0033460	FBgn0035144	FBgn0030701		FBgn0043002	FBgn0002906	FBgn0036725
FBgn0010741	FBgn0058002	FBgn0037369		FBgn0029762		FBgn0033473	FBgn0035148	FBgn0085421		FBgn0051010	FBgn0003079	FBgn0037921
FBgn0010825	FBgn0061469	FBgn0039044		FBgn0029818		FBgn0033515	FBgn0035236	FBgn0003963		FBgn0051313	FBgn0003345	FBgn0037924
FBgn0011013	FBgn0062413	FBgn0035498		FBgn0029820		FBgn0033772	FBgn0035265	FBgn0023215		FBgn0051712	FBgn0003358	FBgn0037942
FBgn0011204	FBgn0066304	FBgn0036688		FBgn0003390		FBgn0033799	FBgn0035266	FBgn0040005		FBgn0052442	FBgn0003462	FBgn0040755
FBgn0011225	FBgn0067783	FBgn0004859		FBgn0029911		FBgn0033883	FBgn0035385			FBgn0052791	FBgn0003520	FBgn0042174
FBgn0011259	FBgn0067903	FBgn0004889		FBgn0029932		FBgn0033949	FBgn0035398			FBgn0053126	FBgn0003545	FBgn0058002
FBgn0011260	FBgn0085347	FBgn0000588		FBgn0029944		FBgn0033971	FBgn0035475			FBgn0062413	FBgn0003866	FBgn0061469
FBgn0011474	FBgn0085432	FBgn0037804		FBgn0026411		FBgn0034045	FBgn0035488			FBgn0086902	FBgn0003964	FBgn0067903
FBgn0011481	FBgn0086902	FBgn0021818		FBgn0052707		FBgn0034081	FBgn0035505			FBgn0259736	FBgn0004045	FBgn0260450
FBgn0011570	FBgn0243505	FBgn0003502		FBgn0030090		FBgn0034181	FBgn0035610			FBgn0260451	FBgn0004133	FBgn0260455
FBgn0011591	FBgn0259736	FBgn0030634		FBgn0030156		FBgn0034229	FBgn0035643			FBgn0260470	FBgn0004179	FBgn0000409
FBgn0011666	FBgn0260450	FBgn0023213		FBgn0030160		FBgn0034304	FBgn0035656			FBgn0036469	FBgn0004370	FBgn0020440
FBgn0011672	FBgn0260451	FBgn0260634		FBgn0030228		FBgn0034328	FBgn0035687			FBgn0000409	FBgn0004387	FBgn0025394
FBgn0011676	FBgn0260453	FBgn0003447		FBgn0030259		FBgn0034363	FBgn0035696			FBgn0020440	FBgn0004399	FBgn0032176
FBgn0011706	FBgn0260454	FBgn0052423		FBgn0030289		FBgn0034378	FBgn0035700			FBgn0025394	FBgn0004618	FBgn0033274
FBgn0011710	FBgn0260455	FBgn0030576		FBgn0030294		FBgn0034490	FBgn0035733			FBgn0032176	FBgn0004648	FBgn0033869
FBgn0011740	FBgn0260470	FBgn0033387		FBgn0052662		FBgn0034542	FBgn0035789			FBgn0033274	FBgn0004654	FBgn0035148
FBgn0011744	FBgn0260474	FBgn0039817		FBgn0030345		FBgn0034577	FBgn0035833			FBgn0033869	FBgn0004811	FBgn0035228
FBgn0011746	FBgn0260499	FBgn0050344		FBgn0030351		FBgn0034634	FBgn0035875			FBgn0035148	FBgn0005427	FBgn0036463
FBgn0011754	FBgn0260934	FBgn0050345		FBgn0030366		FBgn0034741	FBgn0035922			FBgn0035228	FBgn0005630	FBgn0037636
FBgn0011761	FBgn0261259	FBgn0051321		FBgn0030452		FBgn0034802	FBgn0035953			FBgn0036463	FBgn0010217	FBgn0040030
FBgn0011764	FBgn0261285	FBgn0260388		FBgn0030482		FBgn0034846	FBgn0035954			FBgn0037636	FBgn0010333	FBgn0043854
FBgn0011818	FBgn0261444	FBgn0034418		FBgn0030485		FBgn0034887	FBgn0035959			FBgn0040030	FBgn0010399	FBgn0052161
FBgn0011826	FBgn0261563	FBgn0026319		FBgn0030528		FBgn0034889	FBgn0035976			FBgn0043854	FBgn0010548	FBgn0085432
FBgn0012034	FBgn0263289	FBgn0010303		FBgn0030723		FBgn0034909	FBgn0036075			FBgn0052161	FBgn0011204
FBgn0013591	FBgn0261552	FBgn0085413		FBgn0259700		FBgn0034940	FBgn0036101			FBgn0085432	FBgn0011656
FBgn0013732	FBgn0260780	FBgn0032517		FBgn0259699		FBgn0034979	FBgn0036102				FBgn0011676
FBgn0013948	FBgn0053519	FBgn0261387		FBgn0030743		FBgn0035023	FBgn0036116				FBgn0012036
FBgn0013983	FBgn0053208	FBgn0035981		FBgn0030803		FBgn0035111	FBgn0036165				FBgn0013263
FBgn0014009	FBgn0052726	FBgn0035106		FBgn0026192		FBgn0035113	FBgn0036259				FBgn0013949
FBgn0014010	FBgn0052574	FBgn0051999		FBgn0030926		FBgn0035140	FBgn0036264				FBgn0014179
FBgn0014032	FBgn0040475	FBgn0027532		FBgn0030928		FBgn0035145	FBgn0036360				FBgn0015338
FBgn0014135	FBgn0039055	FBgn0034691		FBgn0030932		FBgn0035197	FBgn0036411				FBgn0015521
FBgn0014143	FBgn0038816	FBgn0261238		FBgn0030961		FBgn0035198	FBgn0036446				FBgn0015796
FBgn0014343	FBgn0038606	FBgn0031285		FBgn0030973		FBgn0035228	FBgn0036454				FBgn0015806
FBgn0014362	FBgn0037442	FBgn0005636		FBgn0030985		FBgn0035266	FBgn0036463				FBgn0016059
FBgn0014859	FBgn0035586	FBgn0031952		FBgn0026592		FBgn0035331	FBgn0036485				FBgn0016126
FBgn0014865	FBgn0035039	FBgn0027603		FBgn0000251		FBgn0035398	FBgn0036509				FBgn0016975
FBgn0014906	FBgn0034277	FBgn0052110		FBgn0015790		FBgn0035488	FBgn0036600				FBgn0016976
FBgn0015010	FBgn0034157	FBgn0030685		FBgn0031119		FBgn0035610	FBgn0036605				FBgn0020412
FBgn0015024	FBgn0033639	FBgn0035366		FBgn0052512		FBgn0035612	FBgn0036656				FBgn0020517
FBgn0015221	FBgn0033402	FBgn0010329		FBgn0031190		FBgn0035776	FBgn0036659				FBgn0020620
FBgn0015222	FBgn0032284	FBgn0020379		FBgn0026787		FBgn0035902	FBgn0036665				FBgn0020765
FBgn0015240	FBgn0031201	FBgn0000212		FBgn0031232		FBgn0035953	FBgn0036684				FBgn0020767
FBgn0015245	FBgn0030747	FBgn0036437		FBgn0031253		FBgn0035989	FBgn0036709				FBgn0022201
FBgn0015278	FBgn0030719	FBgn0030089		FBgn0046113		FBgn0036101	FBgn0036741				FBgn0022343
FBgn0015336	FBgn0030672	FBgn0260799		FBgn0031310		FBgn0036116	FBgn0036770				FBgn0022740
FBgn0015360	FBgn0030511	FBgn0046692		FBgn0031344		FBgn0036162	FBgn0036786				FBgn0022960
FBgn0015371	FBgn0030509	FBgn0250753		FBgn0031359		FBgn0036211	FBgn0036817				FBgn0023076
FBgn0015372	FBgn0030114	FBgn0025455		FBgn0031384		FBgn0036260	FBgn0036834				FBgn0023441
FBgn0015396	FBgn0030053	FBgn0001624		FBgn0031397		FBgn0036349	FBgn0036881				FBgn0023534
FBgn0015402	FBgn0029504	FBgn0250876		FBgn0031421		FBgn0036446	FBgn0036904				FBgn0024182
FBgn0015522	FBgn0028375	FBgn0003371		FBgn0031428		FBgn0036481	FBgn0036922				FBgn0024251
FBgn0015576	FBgn0028336	FBgn0046332		FBgn0031435		FBgn0036485	FBgn0036939				FBgn0024308
FBgn0015617	FBgn0027527	FBgn0037442		FBgn0031466		FBgn0036505	FBgn0037016				FBgn0024891
FBgn0015766	FBgn0024230	FBgn0260945		FBgn0031498		FBgn0036627	FBgn0037163				FBgn0024992
FBgn0015772	FBgn0021818	FBgn0036812		FBgn0031540		FBgn0036665	FBgn0037203				FBgn0025378
FBgn0015776	FBgn0020279	FBgn0260012		FBgn0031562		FBgn0036689	FBgn0037248				FBgn0025525
FBgn0015778	FBgn0019990	FBgn0035298		FBgn0031636		FBgn0036741	FBgn0037288				FBgn0025624
FBgn0015790	FBgn0015907	FBgn0261574		FBgn0041150		FBgn0036786	FBgn0037381				FBgn0025633
FBgn0015793	FBgn0010909	FBgn0085442		FBgn0031747		FBgn0036834	FBgn0037391				FBgn0025866
FBgn0015795	FBgn0004656	FBgn0086784		FBgn0031770		FBgn0036872	FBgn0037485				FBgn0026086
FBgn0015801	FBgn0004394	FBgn0027066		FBgn0031801		FBgn0036906	FBgn0037556				FBgn0026373
FBgn0015828	FBgn0003870	FBgn0052371		FBgn0031812		FBgn0036939	FBgn0037646				FBgn0026577
FBgn0015844	FBgn0000414	FBgn0034931		FBgn0031817		FBgn0037156	FBgn0037726				FBgn0026679
FBgn0015904	FBgn0000247	FBgn0032246		FBgn0031834		FBgn0037248	FBgn0037736				FBgn0026760
FBgn0015919	FBgn0000044	FBgn0031990		FBgn0031844		FBgn0037391	FBgn0037782				FBgn0027375
FBgn0015924	FBgn0000045	FBgn0035060		FBgn0031858		FBgn0037461	FBgn0037849				FBgn0027498
FBgn0015946	FBgn0000047	FBgn0039705		FBgn0031872		FBgn0037515	FBgn0037872				FBgn0027508
FBgn0016047	FBgn0000117	FBgn0261270		FBgn0243517		FBgn0037546	FBgn0037890				FBgn0027585
FBgn0016053	FBgn0000166	FBgn0025742		FBgn0031914		FBgn0037646	FBgn0037949				FBgn0028427
FBgn0016059	FBgn0000210	FBgn0033062		FBgn0031939		FBgn0037718	FBgn0037956				FBgn0028581
FBgn0016070	FBgn0000241	FBgn0011817		FBgn0031948		FBgn0037763	FBgn0037972				FBgn0028644
FBgn0016081	FBgn0000338	FBgn0051120		FBgn0031998		FBgn0037829	FBgn0038058				FBgn0028683
FBgn0016131	FBgn0000363	FBgn0038649		FBgn0019968		FBgn0037890	FBgn0038139				FBgn0028905
FBgn0016650	FBgn0000463	FBgn0026403		FBgn0032079		FBgn0037933	FBgn0038296				FBgn0028913
FBgn0016685	FBgn0000464	FBgn0031119		FBgn0032116		FBgn0037956	FBgn0038315				FBgn0028984
FBgn0016694	FBgn0000542	FBgn0001123		FBgn0032139		FBgn0037972	FBgn0038360				FBgn0029003
FBgn0016700	FBgn0000560	FBgn0026479		FBgn0032162		FBgn0037980	FBgn0038404				FBgn0029088
FBgn0016754	FBgn0000565	FBgn0023417		FBgn0032189		FBgn0038033	FBgn0038463				FBgn0029137
FBgn0016920	FBgn0001085	FBgn0035133		FBgn0032262		FBgn0038058	FBgn0038593				FBgn0029175
FBgn0016977	FBgn0001168	FBgn0033467		FBgn0032297		FBgn0038139	FBgn0038652				FBgn0029522
FBgn0016978	FBgn0001235	FBgn0010434		FBgn0032310		FBgn0038166	FBgn0038682				FBgn0029708
FBgn0017397	FBgn0001250	FBgn0034606		FBgn0032314		FBgn0038181	FBgn0038736				FBgn0029711
FBgn0017418	FBgn0001301	FBgn0039528		FBgn0032390		FBgn0038237	FBgn0038745				FBgn0029723
FBgn0017539	FBgn0002577	FBgn0033179		FBgn0032455		FBgn0038357	FBgn0038752				FBgn0029815
FBgn0017558	FBgn0002709	FBgn0033323		FBgn0032469		FBgn0038432	FBgn0038761				FBgn0029836
FBgn0019643	FBgn0002733	FBgn0033324		FBgn0032491		FBgn0038463	FBgn0038809				FBgn0029881
FBgn0019932	FBgn0002774	FBgn0033326		FBgn0032492		FBgn0038549	FBgn0038815				FBgn0029903
FBgn0019960	FBgn0002863	FBgn0033599		FBgn0260011		FBgn0038652	FBgn0038818				FBgn0030093
FBgn0019968	FBgn0002906	FBgn0034156		FBgn0028879		FBgn0038682	FBgn0038828				FBgn0030100
FBgn0019972	FBgn0003079	FBgn0050268		FBgn0243486		FBgn0038683	FBgn0038880				FBgn0030289
FBgn0020258	FBgn0003149	FBgn0050275		FBgn0032688		FBgn0038745	FBgn0039054				FBgn0030451
FBgn0020279	FBgn0003328	FBgn0030230		FBgn0032703		FBgn0038752	FBgn0039074				FBgn0030469
FBgn0020306	FBgn0003345	FBgn0004003		FBgn0032781		FBgn0038761	FBgn0039209				FBgn0030554
FBgn0020309	FBgn0003358	FBgn0052280		FBgn0032800		FBgn0038809	FBgn0039321				FBgn0030581
FBgn0020372	FBgn0003366	FBgn0032214		FBgn0032817		FBgn0038815	FBgn0039354				FBgn0030615
FBgn0020381	FBgn0003380	FBgn0030791		FBgn0032835		FBgn0038880	FBgn0039415				FBgn0030680
FBgn0020407	FBgn0003462	FBgn0044323		FBgn0045064		FBgn0038965	FBgn0039431				FBgn0030706
FBgn0020439	FBgn0003520	FBgn0031256		FBgn0032845		FBgn0039041	FBgn0039540				FBgn0030753
FBgn0020440	FBgn0003545	FBgn0011606		FBgn0032878		FBgn0039066	FBgn0039590				FBgn0030805
FBgn0020445	FBgn0003651	FBgn0051992		FBgn0032913		FBgn0039130	FBgn0039594				FBgn0030842
FBgn0020493	FBgn0003866	FBgn0003218		FBgn0032916		FBgn0039141	FBgn0039619				FBgn0030960
FBgn0020503	FBgn0003892	FBgn0035901		FBgn0033121		FBgn0039187	FBgn0039742				FBgn0030991
FBgn0020517	FBgn0003964	FBgn0004607		FBgn0027558		FBgn0039209	FBgn0039882				FBgn0031038
FBgn0020521	FBgn0003984	FBgn0036850		FBgn0033188		FBgn0039246	FBgn0039908				FBgn0031039
FBgn0020545	FBgn0004045	FBgn0011206		FBgn0033195		FBgn0039321	FBgn0039966				FBgn0031051
FBgn0020622	FBgn0004133	FBgn0002772		FBgn0033212		FBgn0039430	FBgn0040298				FBgn0031057
FBgn0020762	FBgn0004179	FBgn0026611		FBgn0033214		FBgn0039431	FBgn0040375				FBgn0031069
FBgn0021764	FBgn0004370	FBgn0031461		FBgn0033216		FBgn0039449	FBgn0040487				FBgn0031144
FBgn0021768	FBgn0004372	FBgn0033952		FBgn0050377		FBgn0039594	FBgn0040496				FBgn0031184
FBgn0022063	FBgn0004387	FBgn0036751		FBgn0050361		FBgn0039664	FBgn0040752				FBgn0031190
FBgn0022131	FBgn0004399	FBgn0036752		FBgn0033337		FBgn0039696	FBgn0040809				FBgn0031217
FBgn0022201	FBgn0004401	FBgn0038172		FBgn0033342		FBgn0039756	FBgn0040995				FBgn0031220
FBgn0022710	FBgn0004511	FBgn0038173		FBgn0033347		FBgn0039759	FBgn0041094				FBgn0031456
FBgn0022764	FBgn0004580	FBgn0043025		FBgn0033356		FBgn0039789	FBgn0041156				FBgn0031530
FBgn0022768	FBgn0004618	FBgn0010240		FBgn0027561		FBgn0039799	FBgn0041160				FBgn0031646
FBgn0022787	FBgn0004648	FBgn0035639		FBgn0033391		FBgn0039854	FBgn0041585				FBgn0031683
FBgn0022936	FBgn0004649	FBgn0032863		FBgn0259678		FBgn0039908	FBgn0043364				FBgn0031698
FBgn0023023	FBgn0004654	FBgn0051687		FBgn0033482		FBgn0040031	FBgn0044328				FBgn0031721
FBgn0023095	FBgn0004811	FBgn0015546		FBgn0033515		FBgn0040238	FBgn0044871				FBgn0031858
FBgn0023097	FBgn0004858	FBgn0004049		FBgn0033550		FBgn0040299	FBgn0045064				FBgn0031897
FBgn0023215	FBgn0004872	FBgn0053061		FBgn0033772		FBgn0040383	FBgn0046763				FBgn0031950
FBgn0023388	FBgn0005427	FBgn0031762		FBgn0259221		FBgn0040487	FBgn0046875				FBgn0031970
FBgn0023416	FBgn0005630	FBgn0085429		FBgn0086757		FBgn0040508	FBgn0050361				FBgn0032036
FBgn0023423	FBgn0005638	FBgn0030812		FBgn0033845		FBgn0040777	FBgn0050458				FBgn0032061
FBgn0023441	FBgn0005640	FBgn0014467		FBgn0033883		FBgn0041094	FBgn0050490				FBgn0032075
FBgn0023512	FBgn0005654	FBgn0030691		FBgn0040752		FBgn0041160	FBgn0051092				FBgn0032135
FBgn0023521	FBgn0010217	FBgn0034487		FBgn0033902		FBgn0042174	FBgn0051163				FBgn0032215
FBgn0023530	FBgn0010309	FBgn0001233		FBgn0027538		FBgn0042182	FBgn0051183				FBgn0032341
FBgn0023545	FBgn0010333	FBgn0024291		FBgn0085408		FBgn0042696	FBgn0051342				FBgn0032364
FBgn0024150	FBgn0010399	FBgn0000017		FBgn0034031		FBgn0043002	FBgn0051637				FBgn0032365
FBgn0024182	FBgn0010548	FBgn0034433		FBgn0034045		FBgn0043904	FBgn0051849				FBgn0032391
FBgn0024230	FBgn0010825	FBgn0028360		FBgn0034083		FBgn0045064	FBgn0051871				FBgn0032431
FBgn0024250	FBgn0011204	FBgn0039883		FBgn0034105		FBgn0045073	FBgn0051998				FBgn0032450
FBgn0024251	FBgn0011656	FBgn0034529		FBgn0034154		FBgn0050015	FBgn0052085				FBgn0032480
FBgn0024252	FBgn0011676	FBgn0036698		FBgn0034180		FBgn0050389	FBgn0052091				FBgn0032554
FBgn0024315	FBgn0011758	FBgn0024811		FBgn0034201		FBgn0050472	FBgn0052118				FBgn0032731
FBgn0024365	FBgn0012036	FBgn0052393		FBgn0034223		FBgn0051092	FBgn0052121				FBgn0032775
FBgn0024734	FBgn0013263	FBgn0011715		FBgn0034259		FBgn0051163	FBgn0052206				FBgn0032787
FBgn0024753	FBgn0013949	FBgn0036984		FBgn0034304		FBgn0051217	FBgn0052262				FBgn0032797
FBgn0024941	FBgn0014179	FBgn0030183		FBgn0034314		FBgn0051337	FBgn0052406				FBgn0032798
FBgn0024945	FBgn0015338	FBgn0026015		FBgn0034378		FBgn0051712	FBgn0052512				FBgn0032845
FBgn0024947	FBgn0015380	FBgn0030141		FBgn0034389		FBgn0051846	FBgn0052758				FBgn0032883
FBgn0025454	FBgn0015521	FBgn0003016		FBgn0034394		FBgn0051849	FBgn0053144				FBgn0032921
FBgn0025456	FBgn0015794	FBgn0003275		FBgn0034400		FBgn0051870	FBgn0053542				FBgn0033061
FBgn0025549	FBgn0015796	FBgn0029853		FBgn0086358		FBgn0051871	FBgn0053543				FBgn0033095
FBgn0025595	FBgn0015806	FBgn0027836		FBgn0034470		FBgn0052062	FBgn0053635				FBgn0033109
FBgn0025624	FBgn0015808	FBgn0030956		FBgn0034490		FBgn0052085	FBgn0061492				FBgn0033170
FBgn0025639	FBgn0016059	FBgn0030959		FBgn0034494		FBgn0052091	FBgn0083949				FBgn0033199
FBgn0025645	FBgn0016126	FBgn0033876		FBgn0034517		FBgn0052159	FBgn0085373				FBgn0033212
FBgn0025802	FBgn0016794	FBgn0030735		FBgn0034529		FBgn0052207	FBgn0085421				FBgn0033464
FBgn0025806	FBgn0016975	FBgn0030607		FBgn0034634		FBgn0052281	FBgn0085424				FBgn0033474
FBgn0025807	FBgn0016976	FBgn0036449		FBgn0034639		FBgn0052512	FBgn0085442				FBgn0033476
FBgn0025836	FBgn0020236	FBgn0024986		FBgn0034674		FBgn0052613	FBgn0086358				FBgn0033478
FBgn0025879	FBgn0020412	FBgn0034472		FBgn0034718		FBgn0052635	FBgn0086711				FBgn0033564
FBgn0025936	FBgn0020517	FBgn0035334		FBgn0034741		FBgn0052694	FBgn0086779				FBgn0033631
FBgn0026083	FBgn0020620	FBgn0034184		FBgn0034786		FBgn0052758					FBgn0033661
FBgn0026136	FBgn0020765	FBgn0015624		FBgn0034788		FBgn0052791					FBgn0033693
FBgn0026173	FBgn0020767	FBgn0031822		FBgn0034793		FBgn0053144					FBgn0033702
FBgn0026188	FBgn0022201	FBgn0010100		FBgn0034802		FBgn0053203					FBgn0033712
FBgn0026199	FBgn0022343	FBgn0037862		FBgn0034808		FBgn0058006					FBgn0033739
FBgn0026238	FBgn0022740	FBgn0036188		FBgn0034846		FBgn0061492					FBgn0033784
FBgn0026316	FBgn0022960	FBgn0038769		FBgn0034887		FBgn0062412					FBgn0033860
FBgn0026320	FBgn0023076	FBgn0031883		FBgn0034903		FBgn0064115					FBgn0034072
FBgn0026369	FBgn0023097	FBgn0051721		FBgn0034940		FBgn0064126					FBgn0034081
FBgn0026375	FBgn0023441	FBgn0000339		FBgn0035022		FBgn0065097					FBgn0034231
FBgn0026389	FBgn0023534	FBgn0002524		FBgn0035131		FBgn0067895					FBgn0034263
FBgn0026404	FBgn0023537	FBgn0039016		FBgn0035140		FBgn0083967					FBgn0034304
FBgn0026438	FBgn0024182	FBgn0034327		FBgn0035144		FBgn0085342					FBgn0034435
FBgn0026566	FBgn0024189	FBgn0037156		FBgn0035148		FBgn0085424					FBgn0034573
FBgn0026577	FBgn0024251	FBgn0002521		FBgn0035157		FBgn0085442					FBgn0034628
FBgn0026592	FBgn0024308	FBgn0035101		FBgn0035244		FBgn0086358					FBgn0034634
FBgn0026598	FBgn0024891	FBgn0026375		FBgn0035265		FBgn0086364					FBgn0034708
FBgn0026619	FBgn0024944	FBgn0035588		FBgn0015360		FBgn0086370					FBgn0034789
FBgn0026620	FBgn0024992	FBgn0029858		FBgn0035344		FBgn0086758					FBgn0034854
FBgn0026634	FBgn0025378	FBgn0030434		FBgn0035398		FBgn0086899					FBgn0034860
FBgn0026679	FBgn0025525	FBgn0037357		FBgn0035407		FBgn0243517					FBgn0035041
FBgn0026787	FBgn0025574	FBgn0029775		FBgn0035440		FBgn0250851					FBgn0035239
FBgn0027070	FBgn0025624	FBgn0053980		FBgn0052262		FBgn0250910					FBgn0035240
FBgn0027108	FBgn0025631	FBgn0052318		FBgn0035488		FBgn0259109					FBgn0035411
FBgn0027279	FBgn0025633	FBgn0039863		FBgn0035490		FBgn0259168					FBgn0035416
FBgn0027280	FBgn0025712	FBgn0002914		FBgn0035587		FBgn0259176					FBgn0035490
FBgn0027321	FBgn0025836	FBgn0004914		FBgn0035610		FBgn0259482					FBgn0035612
FBgn0027338	FBgn0025866	FBgn0037546		FBgn0040298		FBgn0259678					FBgn0035620
FBgn0027339	FBgn0026086	FBgn0032031		FBgn0035656		FBgn0259994					FBgn0035636
FBgn0027342	FBgn0026239	FBgn0051634		FBgn0259164		FBgn0260467					FBgn0035766
FBgn0027356	FBgn0026373	FBgn0030944		FBgn0035833		FBgn0260935					FBgn0036105
FBgn0027375	FBgn0026375	FBgn0034218		FBgn0035873		FBgn0260944					FBgn0036213
FBgn0027453	FBgn0026577	FBgn0003501		FBgn0035875		FBgn0260964					FBgn0036589
FBgn0027505	FBgn0026679	FBgn0030088		FBgn0035876		FBgn0261015					FBgn0036900
FBgn0027506	FBgn0026760	FBgn0052579		FBgn0010431		FBgn0261085					FBgn0037021
FBgn0027521	FBgn0027085	FBgn0004625		FBgn0035902		FBgn0261086					FBgn0037070
FBgn0027538	FBgn0027375	FBgn0000377		FBgn0035953		FBgn0261383					FBgn0037230
FBgn0027539	FBgn0027498	FBgn0033901		FBgn0035954		FBgn0261397					FBgn0037358
FBgn0027553	FBgn0027508	FBgn0004381		FBgn0035959		FBgn0263097					FBgn0037374
FBgn0027558	FBgn0027529	FBgn0011766		FBgn0035976							FBgn0037386
FBgn0027559	FBgn0027544	FBgn0038576		FBgn0035978							FBgn0037525
FBgn0027561	FBgn0027556	FBgn0036801		FBgn0036101							FBgn0037623
FBgn0027562	FBgn0027585	FBgn0032216		FBgn0036108							FBgn0037652
FBgn0027587	FBgn0028427	FBgn0037554		FBgn0036116							FBgn0037715
FBgn0027589	FBgn0028527	FBgn0036558		FBgn0041094							FBgn0037758
FBgn0027593	FBgn0028581	FBgn0031643		FBgn0036165							FBgn0037856
FBgn0027598	FBgn0028644	FBgn0053519		FBgn0036183							FBgn0037900
FBgn0027601	FBgn0028683	FBgn0028411		FBgn0036191							FBgn0037912
FBgn0027621	FBgn0028905	FBgn0043865		FBgn0036259							FBgn0037913
FBgn0027785	FBgn0028913	FBgn0036064		FBgn0036309							FBgn0037949
FBgn0027788	FBgn0028984	FBgn0024994		FBgn0010715							FBgn0037974
FBgn0027843	FBgn0029003	FBgn0036272		FBgn0260945							FBgn0038419
FBgn0027865	FBgn0029006	FBgn0038571		FBgn0036402							FBgn0038425
FBgn0027951	FBgn0029088	FBgn0035231		FBgn0036417							FBgn0038478
FBgn0028274	FBgn0029092	FBgn0041342		FBgn0036446							FBgn0038499
FBgn0028331	FBgn0029137	FBgn0030114		FBgn0036463							FBgn0038504
FBgn0028336	FBgn0029161	FBgn0260003		FBgn0036485							FBgn0038512
FBgn0028408	FBgn0029175	FBgn0037087		FBgn0036509							FBgn0038577
FBgn0028426	FBgn0029522	FBgn0030218		FBgn0041160							FBgn0038638
FBgn0028428	FBgn0029573	FBgn0037375		FBgn0036544							FBgn0038682
FBgn0028540	FBgn0029657	FBgn0040208		FBgn0036605							FBgn0038683
FBgn0028581	FBgn0029708	FBgn0259176		FBgn0036615							FBgn0038860
FBgn0028582	FBgn0029711	FBgn0030514		FBgn0036616							FBgn0038870
FBgn0028645	FBgn0029723	FBgn0035049		FBgn0036656							FBgn0038921
FBgn0028658	FBgn0029815	FBgn0002787		FBgn0036659							FBgn0039064
FBgn0028664	FBgn0029820	FBgn0002778		FBgn0036660							FBgn0039081
FBgn0028696	FBgn0029836	FBgn0028425		FBgn0036665							FBgn0039209
FBgn0028703	FBgn0029881	FBgn0039487		FBgn0036684							FBgn0039260
FBgn0028708	FBgn0029903	FBgn0031640		FBgn0036732							FBgn0039286
FBgn0028789	FBgn0029913	FBgn0032456		FBgn0036741							FBgn0039596
FBgn0028887	FBgn0030093	FBgn0037024		FBgn0036834							FBgn0039844
FBgn0028892	FBgn0030100	FBgn0030799		FBgn0036872							FBgn0039900
FBgn0028915	FBgn0030181	FBgn0031993		FBgn0036939							FBgn0039908
FBgn0028938	FBgn0030249	FBgn0058188		FBgn0037016							FBgn0040259
FBgn0028961	FBgn0030289	FBgn0058232		FBgn0037071							FBgn0040359
FBgn0028962	FBgn0030330	FBgn0050421		FBgn0037135							FBgn0040366
FBgn0028965	FBgn0030451	FBgn0000287		FBgn0010830							FBgn0040397
FBgn0028979	FBgn0030459	FBgn0004579		FBgn0037203							FBgn0040508
FBgn0028985	FBgn0030469	FBgn0032988		FBgn0261086							FBgn0040688
FBgn0028999	FBgn0030554	FBgn0036017		FBgn0037233							FBgn0041585
FBgn0029003	FBgn0030581	FBgn0027348		FBgn0037336							FBgn0041605
FBgn0029082	FBgn0030615	FBgn0028519		FBgn0037391							FBgn0044419
FBgn0029088	FBgn0030680	FBgn0025777		FBgn0037461							FBgn0044823
FBgn0029114	FBgn0030706	FBgn0039664		FBgn0037536							FBgn0045476
FBgn0029123	FBgn0030753	FBgn0027619		FBgn0037553							FBgn0050217
FBgn0029155	FBgn0030788	FBgn0027844		FBgn0037556							FBgn0050420
FBgn0029175	FBgn0030805	FBgn0033544		FBgn0062412							FBgn0050431
FBgn0029514	FBgn0030842	FBgn0035587		FBgn0037646							FBgn0050438
FBgn0029608	FBgn0030894	FBgn0052183		FBgn0037663							FBgn0051005
FBgn0029662	FBgn0030960	FBgn0051641		FBgn0260935							FBgn0051169
FBgn0029663	FBgn0030991	FBgn0013303		FBgn0052939							FBgn0051665
FBgn0029700	FBgn0031038	FBgn0002431		FBgn0037731							FBgn0051676
FBgn0029702	FBgn0031039	FBgn0035945		FBgn0037736							FBgn0051845
FBgn0029720	FBgn0031051	FBgn0038293		FBgn0037763							FBgn0052233
FBgn0029723	FBgn0031057	FBgn0003435		FBgn0037782							FBgn0052573
FBgn0029726	FBgn0031069	FBgn0039068		FBgn0037829							FBgn0052694
FBgn0029762	FBgn0031144	FBgn0053474		FBgn0037849							FBgn0052813
FBgn0029818	FBgn0031184	FBgn0015844		FBgn0037890							FBgn0053082
FBgn0029819	FBgn0031190	FBgn0014963		FBgn0037949							FBgn0053097
FBgn0029820	FBgn0031217	FBgn0035936		FBgn0037956							FBgn0053964
FBgn0029828	FBgn0031220	FBgn0039923		FBgn0037972							FBgn0053993
FBgn0029837	FBgn0031261	FBgn0010382		FBgn0038058							FBgn0061356
FBgn0029846	FBgn0031367	FBgn0035124		FBgn0038188							FBgn0061359
FBgn0029849	FBgn0031424	FBgn0003074		FBgn0038344							FBgn0061360
FBgn0029854	FBgn0031456	FBgn0010379		FBgn0051183							FBgn0064116
FBgn0029870	FBgn0031530	FBgn0003612		FBgn0038404							FBgn0064117
FBgn0029891	FBgn0031550	FBgn0037018		FBgn0044826							FBgn0065059
FBgn0029912	FBgn0031646	FBgn0005634		FBgn0038432							FBgn0067622
FBgn0029932	FBgn0031683	FBgn0004102		FBgn0027562							FBgn0067782
FBgn0029935	FBgn0031698	FBgn0022288		FBgn0038453							FBgn0083959
FBgn0029944	FBgn0031721	FBgn0030482		FBgn0038463							FBgn0085353
FBgn0029969	FBgn0031725	FBgn0017448		FBgn0038471							FBgn0085430
FBgn0029970	FBgn0031737	FBgn0029950		FBgn0038549							FBgn0086134
FBgn0029979	FBgn0031739	FBgn0031998		FBgn0028499							FBgn0086372
FBgn0029980	FBgn0031858	FBgn0034494		FBgn0038588							FBgn0086676
FBgn0029996	FBgn0031897	FBgn0035293		FBgn0038593							FBgn0086680
FBgn0030085	FBgn0031950	FBgn0037895		FBgn0051232							FBgn0086768
FBgn0030089	FBgn0031970	FBgn0039872		FBgn0044871							FBgn0086778
FBgn0030090	FBgn0032025	FBgn0039873		FBgn0038652							FBgn0086896
FBgn0030098	FBgn0032036	FBgn0051668		FBgn0038680							FBgn0086910
FBgn0030114	FBgn0032061	FBgn0052669		FBgn0038682							FBgn0250851
FBgn0030141	FBgn0032074	FBgn0053124		FBgn0038752							FBgn0250910
FBgn0030160	FBgn0032075	FBgn0250757		FBgn0038761							FBgn0259139
FBgn0030161	FBgn0032135	FBgn0035103		FBgn0038815							FBgn0259166
FBgn0030207	FBgn0032215	FBgn0020622		FBgn0038818							FBgn0259685
FBgn0030208	FBgn0032341	FBgn0010220		FBgn0038865							FBgn0259794
FBgn0030228	FBgn0032364	FBgn0016131		FBgn0038973							FBgn0260401
FBgn0030263	FBgn0032365	FBgn0038672		FBgn0039002							FBgn0260458
FBgn0030266	FBgn0032391	FBgn0067895		FBgn0039041							FBgn0260642
FBgn0030281	FBgn0032431	FBgn0013343		FBgn0027539							FBgn0261238
FBgn0030286	FBgn0032450	FBgn0036143		FBgn0039232							FBgn0261279
FBgn0030289	FBgn0032480	FBgn0026404		FBgn0039246							FBgn0261349
FBgn0030294	FBgn0032494	FBgn0036515		FBgn0039296							FBgn0261362
FBgn0030299	FBgn0032554	FBgn0003204		FBgn0039321							FBgn0261382
FBgn0030323	FBgn0032702	FBgn0020304		FBgn0039335							FBgn0262647
FBgn0030330	FBgn0032731	FBgn0039132		FBgn0039352							FBgn0001250
FBgn0030332	FBgn0032775	FBgn0000629		FBgn0039367							FBgn0030788
FBgn0030345	FBgn0032787	FBgn0003513		FBgn0051323							FBgn0036814
FBgn0030351	FBgn0032797	FBgn0010256		FBgn0039420							FBgn0001085
FBgn0030366	FBgn0032798	FBgn0039797		FBgn0039590							FBgn0031261
FBgn0030411	FBgn0032833	FBgn0013751		FBgn0039594							FBgn0032025
FBgn0030431	FBgn0032840	FBgn0031089		FBgn0027578							FBgn0032494
FBgn0030432	FBgn0032845	FBgn0022709		FBgn0041780							FBgn0034243
FBgn0030448	FBgn0032883	FBgn0030559		FBgn0039696							FBgn0036298
FBgn0030452	FBgn0032921	FBgn0035916		FBgn0039734							FBgn0036565
FBgn0030482	FBgn0033061	FBgn0028500		FBgn0039759							FBgn0037911
FBgn0030484	FBgn0033095	FBgn0033233		FBgn0039789							FBgn0039994
FBgn0030485	FBgn0033109	FBgn0053182		FBgn0039799							FBgn0043884
FBgn0030528	FBgn0033170	FBgn0027596		FBgn0039800							FBgn0051286
FBgn0030555	FBgn0033199	FBgn0039039		FBgn0039832							FBgn0052756
FBgn0030574	FBgn0033212	FBgn0259228		FBgn0039854
FBgn0030576	FBgn0033214	FBgn0259109		FBgn0011013
FBgn0030590	FBgn0033460	FBgn0053936		FBgn0039882
FBgn0030613	FBgn0033464	FBgn0010317		FBgn0013948
FBgn0030627	FBgn0033474	FBgn0041195		FBgn0046763
FBgn0030671	FBgn0033476	FBgn0034013		FBgn0040606
FBgn0030672	FBgn0033478	FBgn0003716		FBgn0040687
FBgn0030680	FBgn0033564	FBgn0032154		FBgn0040723
FBgn0030693	FBgn0033572	FBgn0037239		FBgn0040734
FBgn0030701	FBgn0033631	FBgn0035938		FBgn0040928
FBgn0030703	FBgn0033661	FBgn0005355		FBgn0040992
FBgn0030743	FBgn0033693	FBgn0031478		FBgn0040238
FBgn0030745	FBgn0033702	FBgn0035424		FBgn0040280
FBgn0030747	FBgn0033712	FBgn0038183		FBgn0260451
FBgn0030798	FBgn0033739	FBgn0024360		FBgn0031671
FBgn0030803	FBgn0033784	FBgn0032509		FBgn0260470
FBgn0030809	FBgn0033860	FBgn0032378		FBgn0041702
FBgn0030826	FBgn0033886	FBgn0035422		FBgn0027561
FBgn0030833	FBgn0033990	FBgn0026160		FBgn0037238
FBgn0030838	FBgn0034072	FBgn0031760		FBgn0031229
FBgn0030843	FBgn0034081	FBgn0053520		FBgn0043364
FBgn0030884	FBgn0034231	FBgn0085421		FBgn0016926
FBgn0030890	FBgn0034243	FBgn0000986		FBgn0031449
FBgn0030892	FBgn0034263	FBgn0260856		FBgn0031474
FBgn0030894	FBgn0034304	FBgn0003607		FBgn0040280
FBgn0030898	FBgn0034435	FBgn0030082		FBgn0260451
FBgn0030900	FBgn0034518	FBgn0031613		FBgn0031671
FBgn0030904	FBgn0034573	FBgn0039019		FBgn0260470
FBgn0030926	FBgn0034628	FBgn0030038		FBgn0031858
FBgn0030928	FBgn0034634	FBgn0044871		FBgn0022201
FBgn0030932	FBgn0034708	FBgn0037262		FBgn0260479
FBgn0030960	FBgn0034713	FBgn0040079		FBgn0051904
FBgn0030961	FBgn0034789	FBgn0003261		FBgn0032036
FBgn0030973	FBgn0034810	FBgn0029979		FBgn0032084
FBgn0030975	FBgn0034854	FBgn0035720		FBgn0051871
FBgn0030985	FBgn0034860	FBgn0028689		FBgn0004579
FBgn0031003	FBgn0034894	FBgn0036008		FBgn0259176
FBgn0031016	FBgn0035041	FBgn0039566		FBgn0051849
FBgn0031022	FBgn0035087	FBgn0016694		FBgn0004002
FBgn0031038	FBgn0035192	FBgn0259243		FBgn0002939
FBgn0031039	FBgn0035197	FBgn0040324		FBgn0004145
FBgn0031059	FBgn0035239	FBgn0020238		FBgn0050363
FBgn0031065	FBgn0035240	FBgn0261524		FBgn0050366
FBgn0031069	FBgn0035283	FBgn0039859		FBgn0016047
FBgn0031097	FBgn0035411	FBgn0028419		FBgn0050051
FBgn0031098	FBgn0035416	FBgn0036967		FBgn0050055
FBgn0031119	FBgn0035461	FBgn0046247		FBgn0004435
FBgn0031139	FBgn0035490	FBgn0037215		FBgn0085341
FBgn0031144	FBgn0035612	FBgn0000567		FBgn0050058
FBgn0031190	FBgn0035620	FBgn0037347		FBgn0050472
FBgn0031191	FBgn0035636	FBgn0041171		FBgn0034031
FBgn0031220	FBgn0035697	FBgn0039559		FBgn0050096
FBgn0031232	FBgn0035766	FBgn0037248		FBgn0024315
FBgn0031275	FBgn0036056	FBgn0031711		FBgn0003091
FBgn0031285	FBgn0036105	FBgn0000524		FBgn0021818
FBgn0031300	FBgn0036169	FBgn0020626		FBgn0034408
FBgn0031310	FBgn0036180	FBgn0025639		FBgn0050147
FBgn0031343	FBgn0036213	FBgn0002021		FBgn0015844
FBgn0031362	FBgn0036298	FBgn0033093		FBgn0043070
FBgn0031384	FBgn0036565	FBgn0029503		FBgn0034644
FBgn0031397	FBgn0036589	FBgn0015247		FBgn0050403
FBgn0031423	FBgn0036814	FBgn0032467		FBgn0005631
FBgn0031428	FBgn0036900	FBgn0004419		FBgn0034894
FBgn0031435	FBgn0037021	FBgn0020224		FBgn0034979
FBgn0031449	FBgn0037070	FBgn0026438		FBgn0085442
FBgn0031454	FBgn0037230	FBgn0039687		FBgn0050429
FBgn0031455	FBgn0037336	FBgn0039120		FBgn0039908
FBgn0031466	FBgn0037338	FBgn0030460		FBgn0026199
FBgn0031473	FBgn0037358	FBgn0042134		FBgn0026199
FBgn0031474	FBgn0037365	FBgn0011672		FBgn0004655
FBgn0031490	FBgn0037374	FBgn0028485		FBgn0052791
FBgn0031498	FBgn0037386	FBgn0040056		FBgn0261383
FBgn0031515	FBgn0037525	FBgn0027356		FBgn0027321
FBgn0031526	FBgn0037623	FBgn0026149		FBgn0029849
FBgn0031528	FBgn0037652	FBgn0035617		FBgn0086133
FBgn0031537	FBgn0037715	FBgn0025117		FBgn0004646
FBgn0031558	FBgn0037720	FBgn0010194		FBgn0027342
FBgn0031562	FBgn0037724	FBgn0002736		FBgn0030160
FBgn0031590	FBgn0037731	FBgn0038369		FBgn0001624
FBgn0031619	FBgn0037758	FBgn0065032		FBgn0030299
FBgn0031636	FBgn0037847	FBgn0004198		FBgn0004370
FBgn0031661	FBgn0037856	FBgn0030654		FBgn0030345
FBgn0031681	FBgn0037899	FBgn0027568		FBgn0005410
FBgn0031698	FBgn0037900	FBgn0014396		FBgn0052635
FBgn0031734	FBgn0037911	FBgn0038118		FBgn0030706
FBgn0031747	FBgn0037912	FBgn0032516		FBgn0259700
FBgn0031760	FBgn0037913	FBgn0039904		FBgn0259699
FBgn0031770	FBgn0037949	FBgn0004860		FBgn0004598
FBgn0031779	FBgn0037974	FBgn0004861		FBgn0000257
FBgn0031801	FBgn0038028	FBgn0031378		FBgn0031119
FBgn0031804	FBgn0038130	FBgn0054015		FBgn0035111
FBgn0031812	FBgn0038160	FBgn0032486		FBgn0052281
FBgn0031817	FBgn0038325	FBgn0028699		FBgn0065097
FBgn0031820	FBgn0038351	FBgn0035107		FBgn0015766
FBgn0031835	FBgn0038353	FBgn0028554		FBgn0052406
FBgn0031858	FBgn0038419	FBgn0035687		FBgn0061492
FBgn0031885	FBgn0038425	FBgn0024734		FBgn0005658
FBgn0031896	FBgn0038478	FBgn0004666		FBgn0035720
FBgn0031897	FBgn0038499	FBgn0038344		FBgn0052038
FBgn0031914	FBgn0038504	FBgn0031150		FBgn0045770
FBgn0031927	FBgn0038512	FBgn0041781		FBgn0052091
FBgn0031948	FBgn0038577	FBgn0039349		FBgn0036187
FBgn0031971	FBgn0038638	FBgn0042712		FBgn0052085
FBgn0031979	FBgn0038682	FBgn0029834		FBgn0052105
FBgn0031988	FBgn0038683	FBgn0001296		FBgn0027593
FBgn0031995	FBgn0038740	FBgn0052264		FBgn0036821
FBgn0031997	FBgn0038829	FBgn0038404		FBgn0052208
FBgn0031998	FBgn0038860	FBgn0063649		FBgn0052213
FBgn0032036	FBgn0038870	FBgn0036369		FBgn0052207
FBgn0032051	FBgn0038921	FBgn0030420		FBgn0052226
FBgn0032076	FBgn0038926	FBgn0035713		FBgn0036992
FBgn0032077	FBgn0039064	FBgn0085644		FBgn0037138
FBgn0032078	FBgn0039081	FBgn0010611		FBgn0037381
FBgn0032079	FBgn0039089	FBgn0033624		FBgn0003261
FBgn0032116	FBgn0039196	FBgn0030573		FBgn0046875
FBgn0032120	FBgn0039209	FBgn0034660		FBgn0037442
FBgn0032123	FBgn0039214	FBgn0039848		FBgn0037556
FBgn0032166	FBgn0039226	FBgn0026562		FBgn0003015
FBgn0032170	FBgn0039260	FBgn0001205		FBgn0037890
FBgn0032262	FBgn0039281	FBgn0025608		FBgn0037944
FBgn0032283	FBgn0039286	FBgn0032209		FBgn0025802
FBgn0032297	FBgn0039596	FBgn0259220		FBgn0038139
FBgn0032305	FBgn0039639	FBgn0033763		FBgn0038220
FBgn0032310	FBgn0039688	FBgn0011725		FBgn0051313
FBgn0032314	FBgn0039711	FBgn0002525		FBgn0003117
FBgn0032358	FBgn0039844	FBgn0010397		FBgn0044826
FBgn0032363	FBgn0039852	FBgn0015299		FBgn0025456
FBgn0032378	FBgn0039900	FBgn0038380		FBgn0025456
FBgn0032390	FBgn0039908	FBgn0026778		FBgn0042693
FBgn0032455	FBgn0039946	FBgn0025698		FBgn0038745
FBgn0032467	FBgn0039994	FBgn0004177		FBgn0038762
FBgn0032469	FBgn0040259	FBgn0053967		FBgn0259222
FBgn0032479	FBgn0040359	FBgn0020261		FBgn0039141
FBgn0032480	FBgn0040366	FBgn0038331		FBgn0039186
FBgn0032538	FBgn0040397	FBgn0001105		FBgn0039209
FBgn0032618	FBgn0040508	FBgn0003257		FBgn0051118
FBgn0032633	FBgn0040688	FBgn0020367		FBgn0039321
FBgn0032656	FBgn0040780	FBgn0020368		FBgn0051087
FBgn0032673	FBgn0041585	FBgn0032464		FBgn0039354
FBgn0032684	FBgn0041605	FBgn0033052		FBgn0039637
FBgn0032688	FBgn0043884	FBgn0003169		FBgn0051202
FBgn0032689	FBgn0044419	FBgn0038586		FBgn0039831
FBgn0032694	FBgn0044823	FBgn0039581		FBgn0028968
FBgn0032702	FBgn0045476	FBgn0051116		FBgn0003870
FBgn0032703	FBgn0047178	FBgn0028741		FBgn0005630
FBgn0032713	FBgn0050001	FBgn0050011		FBgn0035989
FBgn0032800	FBgn0050147	FBgn0035676		FBgn0004811
FBgn0032821	FBgn0050217	FBgn0041096		FBgn0033236
FBgn0032833	FBgn0050395	FBgn0028516		FBgn0053144
FBgn0032856	FBgn0050420	FBgn0051860		FBgn0029082
FBgn0032865	FBgn0050424	FBgn0027497		FBgn0053197
FBgn0032867	FBgn0050431	FBgn0250788		FBgn0260457
FBgn0032878	FBgn0050438	FBgn0259821		FBgn0035114
FBgn0032880	FBgn0051005	FBgn0052373		FBgn0036391
FBgn0032894	FBgn0051053	FBgn0031697		FBgn0036663
FBgn0032916	FBgn0051091	FBgn0035287		FBgn0004648
FBgn0032923	FBgn0051145	FBgn0259483		FBgn0030114
FBgn0032926	FBgn0051169	FBgn0038376		FBgn0020445
FBgn0032956	FBgn0051286	FBgn0037808		FBgn0032120
FBgn0033121	FBgn0051337	FBgn0051935		FBgn0028985
FBgn0033129	FBgn0051665	FBgn0014380		FBgn0033232
FBgn0033159	FBgn0051676	FBgn0039663		FBgn0033473
FBgn0033177	FBgn0051845	FBgn0015288		FBgn0005630
FBgn0033188	FBgn0052017	FBgn0034837		FBgn0034180
FBgn0033195	FBgn0052233	FBgn0013591		FBgn0034181
FBgn0033208	FBgn0052372	FBgn0023395		FBgn0016059
FBgn0033214	FBgn0052425	FBgn0033883		FBgn0036505
FBgn0033224	FBgn0052573	FBgn0005386		FBgn0036672
FBgn0033226	FBgn0052694	FBgn0004227		FBgn0036672
FBgn0033232	FBgn0052756	FBgn0015520		FBgn0037475
FBgn0033234	FBgn0052813	FBgn0037218		FBgn0001624
FBgn0033236	FBgn0053082	FBgn0019890		FBgn0004370
FBgn0033244	FBgn0053097	FBgn0024285		FBgn0011764
FBgn0033257	FBgn0053472	FBgn0032243		FBgn0004598
FBgn0033259	FBgn0053964	FBgn0260946		FBgn0083228
FBgn0033267	FBgn0053993	FBgn0000337		FBgn0064225
FBgn0033269	FBgn0058191	FBgn0035050		FBgn0261015
FBgn0033288	FBgn0061356	FBgn0032408		FBgn0037248
FBgn0033289	FBgn0061359	FBgn0031081		FBgn0259994
FBgn0033337	FBgn0061360	FBgn0000575
FBgn0033342	FBgn0064116	FBgn0036915
FBgn0033347	FBgn0064117	FBgn0028662
FBgn0033355	FBgn0064126	FBgn0038276
FBgn0033356	FBgn0065059	FBgn0037846
FBgn0033368	FBgn0066303	FBgn0031308
FBgn0033382	FBgn0067622	FBgn0028926
FBgn0033391	FBgn0067782	FBgn0011285
FBgn0033392	FBgn0083959	FBgn0033451
FBgn0033453	FBgn0085253	FBgn0037698
FBgn0033460	FBgn0085353	FBgn0039337
FBgn0033465	FBgn0085383	FBgn0034277
FBgn0033473	FBgn0085384	FBgn0033748
FBgn0033478	FBgn0085392	FBgn0033749
FBgn0033484	FBgn0085412	FBgn0030887
FBgn0033495	FBgn0085430	FBgn0035763
FBgn0033502	FBgn0086134	FBgn0005596
FBgn0033515	FBgn0086372	FBgn0010315
FBgn0033518	FBgn0086605	FBgn0014037
FBgn0033524	FBgn0086676	FBgn0004436
FBgn0033538	FBgn0086680	FBgn0261436
FBgn0033550	FBgn0086758	FBgn0086451
FBgn0033579	FBgn0086768	FBgn0011224
FBgn0033589	FBgn0086778	FBgn0026777
FBgn0033607	FBgn0086896	FBgn0014879
FBgn0033610	FBgn0086910	FBgn0015791
FBgn0033638	FBgn0250851	FBgn0003139
FBgn0033667	FBgn0250910	FBgn0039304
FBgn0033673	FBgn0259139	FBgn0028996
FBgn0033698	FBgn0259166	FBgn0028858
FBgn0033707	FBgn0259685	FBgn0033408
FBgn0033728	FBgn0259794	FBgn0051108
FBgn0033731	FBgn0259994	FBgn0033196
FBgn0033772	FBgn0260241	FBgn0037891
FBgn0033777	FBgn0260401	FBgn0028474
FBgn0033799	FBgn0260458	FBgn0013954
FBgn0033806	FBgn0260466	FBgn0029939
FBgn0033814	FBgn0260642	FBgn0027579
FBgn0033836	FBgn0260874	FBgn0039380
FBgn0033848	FBgn0261238	FBgn0261569
FBgn0033867	FBgn0261279	FBgn0001124
FBgn0033868	FBgn0261349	FBgn0000384
FBgn0033883	FBgn0261362	FBgn0003267
FBgn0033912	FBgn0261382	FBgn0004619
FBgn0033925	FBgn0261641	FBgn0028431
FBgn0033943	FBgn0262647	FBgn0038609
FBgn0033949	FBgn0262732	FBgn0020385
FBgn0033970	FBgn0263037	FBgn0030342
FBgn0033971	FBgn0263047	FBgn0000581
FBgn0033984	FBgn0263108	FBgn0038100
FBgn0033988	FBgn0263112	FBgn0028375
FBgn0034025	FBgn0263116	FBgn0036537
FBgn0034027	FBgn0263980	FBgn0036538
FBgn0034031	FBgn0264491	FBgn0042138
FBgn0034032	FBgn0264754	FBgn0027053
FBgn0034045	FBgn0264907	FBgn0030700
FBgn0034046	FBgn0032240	FBgn0031005
FBgn0034063		FBgn0036039
FBgn0034068		FBgn0085212
FBgn0034081		FBgn0039889
FBgn0034083		FBgn0038666
FBgn0034094		FBgn0024958
FBgn0034110		FBgn0039601
FBgn0034179		FBgn0023097
FBgn0034181		FBgn0003270
FBgn0034184		FBgn0036018
FBgn0034225		FBgn0003415
FBgn0034229		FBgn0030343
FBgn0034240		FBgn0014859
FBgn0034242		FBgn0004107
FBgn0034282		FBgn0034276
FBgn0034304		FBgn0022344
FBgn0034307		FBgn0035769
FBgn0034308		FBgn0259743
FBgn0034328		FBgn0024542
FBgn0034355		FBgn0028538
FBgn0034356		FBgn0022213
FBgn0034363		FBgn0035601
FBgn0034378		FBgn0031106
FBgn0034389		FBgn0000455
FBgn0034394		FBgn0033452
FBgn0034400		FBgn0013717
FBgn0034408		FBgn0015542
FBgn0034418		FBgn0019985
FBgn0034420		FBgn0050361
FBgn0034421		FBgn0027494
FBgn0034464		FBgn0031035
FBgn0034468		FBgn0005612
FBgn0034470		FBgn0033162
FBgn0034484		FBgn0003053
FBgn0034490		FBgn0036695
FBgn0034517		FBgn0029907
FBgn0034521		FBgn0003300
FBgn0034527		FBgn0030699
FBgn0034540		FBgn0032292
FBgn0034541		FBgn0033337
FBgn0034542		FBgn0014029
FBgn0034577		FBgn0026361
FBgn0034603		FBgn0032236
FBgn0034606		FBgn0032156
FBgn0034634		FBgn0020272
FBgn0034639		FBgn0003278
FBgn0034644		FBgn0025519
FBgn0034655		FBgn0037109
FBgn0034674		FBgn0037434
FBgn0034709		FBgn0031566
FBgn0034716		FBgn0036837
FBgn0034718		FBgn0250791
FBgn0034725		FBgn0017414
FBgn0034741		FBgn0029816
FBgn0034753		FBgn0033669
FBgn0034784		FBgn0037898
FBgn0034794		FBgn0003028
FBgn0034802		FBgn0036774
FBgn0034846		FBgn0038424
FBgn0034853		FBgn0259935
FBgn0034861		FBgn0004926
FBgn0034862		FBgn0039282
FBgn0034876		FBgn0039116
FBgn0034887		FBgn0039636
FBgn0034889		FBgn0033845
FBgn0034903		FBgn0039140
FBgn0034909		FBgn0030806
FBgn0034911		FBgn0015622
FBgn0034940		FBgn0030377
FBgn0034958		FBgn0030755
FBgn0034959		FBgn0004636
FBgn0034976		FBgn0036414
FBgn0034979		FBgn0086693
FBgn0034997		FBgn0031183
FBgn0035001		FBgn0033355
FBgn0035010		FBgn0013733
FBgn0035023		FBgn0036309
FBgn0035041		FBgn0001104
FBgn0035060		FBgn0051849
FBgn0035090		FBgn0014011
FBgn0035092		FBgn0037735
FBgn0035101		FBgn0035437
FBgn0035111		FBgn0033757
FBgn0035113		FBgn0025682
FBgn0035140		FBgn0040011
FBgn0035144		FBgn0261477
FBgn0035145		FBgn0000015
FBgn0035146		FBgn0051075
FBgn0035148		FBgn0061515
FBgn0035157		FBgn0033194
FBgn0035169		FBgn0050378
FBgn0035186		FBgn0000318
FBgn0035197		FBgn0040396
FBgn0035198		FBgn0014395
FBgn0035199		FBgn0030530
FBgn0035228		FBgn0035500
FBgn0035229		FBgn0000139
FBgn0035236		FBgn0038300
FBgn0035244		FBgn0086901
FBgn0035252		FBgn0038473
FBgn0035265		FBgn0032633
FBgn0035266		FBgn0039229
FBgn0035296		FBgn0034155
FBgn0035331		FBgn0021953
FBgn0035385		FBgn0034999
FBgn0035398		FBgn0050194
FBgn0035416		FBgn0259212
FBgn0035422		FBgn0037702
FBgn0035425		FBgn0047178
FBgn0035431		FBgn0033887
FBgn0035440		FBgn0034887
FBgn0035454		FBgn0034888
FBgn0035475		FBgn0037665
FBgn0035486		FBgn0050476
FBgn0035488		FBgn0041156
FBgn0035490		FBgn0039179
FBgn0035505		FBgn0003575
FBgn0035540		FBgn0259937
FBgn0035557		FBgn0028467
FBgn0035591		FBgn0004878
FBgn0035610		FBgn0036168
FBgn0035612		FBgn0023143
FBgn0035636		FBgn0038590
FBgn0035643		FBgn0034791
FBgn0035648		FBgn0031599
FBgn0035656		FBgn0030057
FBgn0035677		FBgn0035244
FBgn0035687		FBgn0030572
FBgn0035688		FBgn0261064
FBgn0035696		FBgn0003386
FBgn0035700		FBgn0085395
FBgn0035720		FBgn0004380
FBgn0035733		FBgn0022027
FBgn0035763		FBgn0031463
FBgn0035776		FBgn0260972
FBgn0035789		FBgn0033378
FBgn0035793		FBgn0042083
FBgn0035807		FBgn0031050
FBgn0035811		FBgn0015657
FBgn0035825		FBgn0030207
FBgn0035833		FBgn0031322
FBgn0035859		FBgn0037151
FBgn0035875		FBgn0033246
FBgn0035876		FBgn0014462
FBgn0035880		FBgn0038923
FBgn0035902		FBgn0010173
FBgn0035907		FBgn0058045
FBgn0035914		FBgn0034627
FBgn0035922		FBgn0260749
FBgn0035942		FBgn0039727
FBgn0035953		FBgn0024841
FBgn0035954		FBgn0053558
FBgn0035959		FBgn0023172
FBgn0035975		FBgn0028400
FBgn0035976		FBgn0038272
FBgn0035978		FBgn0037624
FBgn0035983		FBgn0033269
FBgn0035989		FBgn0036862
FBgn0036004		FBgn0038606
FBgn0036043		FBgn0067864
FBgn0036053		FBgn0035410
FBgn0036075		FBgn0015278
FBgn0036101		FBgn0000723
FBgn0036102		FBgn0003255
FBgn0036108		FBgn0037874
FBgn0036116		FBgn0036659
FBgn0036162		FBgn0053113
FBgn0036165		FBgn0028397
FBgn0036183		FBgn0026252
FBgn0036211		FBgn0023094
FBgn0036248		FBgn0052626
FBgn0036259		FBgn0025802
FBgn0036260		FBgn0002973
FBgn0036264		FBgn0004925
FBgn0036309		FBgn0004647
FBgn0036341		FBgn0010348
FBgn0036349		FBgn0030641
FBgn0036360		FBgn0020371
FBgn0036402		FBgn0031164
FBgn0036411		FBgn0067318
FBgn0036428		FBgn0010198
FBgn0036446		FBgn0033555
FBgn0036454		FBgn0034636
FBgn0036463		FBgn0027581
FBgn0036476		FBgn0086736
FBgn0036481		FBgn0000181
FBgn0036485		FBgn0031264
FBgn0036496		FBgn0051139
FBgn0036505		FBgn0038146
FBgn0036509		FBgn0039490
FBgn0036569		FBgn0039491
FBgn0036600		FBgn0046323
FBgn0036605		FBgn0035762
FBgn0036616		FBgn0038826
FBgn0036621		FBgn0027330
FBgn0036627		FBgn0033352
FBgn0036640		FBgn0036770
FBgn0036656		FBgn0033836
FBgn0036659		FBgn0260475
FBgn0036660		FBgn0030778
FBgn0036661		FBgn0037084
FBgn0036663		FBgn0001147
FBgn0036665		FBgn0001148
FBgn0036684		FBgn0003145
FBgn0036689		FBgn0260486
FBgn0036709		FBgn0026147
FBgn0036732		FBgn0031574
FBgn0036735		FBgn0053100
FBgn0036741		FBgn0029688
FBgn0036763		FBgn0039623
FBgn0036770		FBgn0014141
FBgn0036786		FBgn0086785
FBgn0036817		FBgn0261261
FBgn0036834		FBgn0037643
FBgn0036842		FBgn0033058
FBgn0036872		FBgn0050106
FBgn0036881		FBgn0001565
FBgn0036882		FBgn0015558
FBgn0036888		FBgn0029791
FBgn0036890		FBgn0040284
FBgn0036904		FBgn0031186
FBgn0036906		FBgn0003742
FBgn0036922		FBgn0046222
FBgn0036939		FBgn0027363
FBgn0036953		FBgn0020510
FBgn0036975		FBgn0030724
FBgn0036980		FBgn0027783
FBgn0037016		FBgn0034158
FBgn0037024		FBgn0261570
FBgn0037070		FBgn0062412
FBgn0037094		FBgn0035540
FBgn0037109		FBgn0030407
FBgn0037116		FBgn0001078
FBgn0037134		FBgn0034495
FBgn0037135		FBgn0020279
FBgn0037138		FBgn0260442
FBgn0037142		FBgn0037370
FBgn0037156		FBgn0033259
FBgn0037163		FBgn0003887
FBgn0037203		FBgn0003889
FBgn0037248		FBgn0053144
FBgn0037288		FBgn0053556
FBgn0037326		FBgn0031882
FBgn0037354		FBgn0036990
FBgn0037363		FBgn0011661
FBgn0037368		FBgn0031850
FBgn0037381		FBgn0031374
FBgn0037384		FBgn0011692
FBgn0037391		FBgn0026431
FBgn0037442		FBgn0259984
FBgn0037447		FBgn0028970
FBgn0037461		FBgn0030612
FBgn0037475		FBgn0035317
FBgn0037485		FBgn0039421
FBgn0037515		FBgn0086361
FBgn0037536		FBgn0024555
FBgn0037546		FBgn0039773
FBgn0037553		FBgn0038916
FBgn0037556		FBgn0058042
FBgn0037603		FBgn0033475
FBgn0037606		FBgn0035376
FBgn0037646		FBgn0026199
FBgn0037697		FBgn0005640
FBgn0037718		FBgn0031458
FBgn0037726		FBgn0035207
FBgn0037734		FBgn0086897
FBgn0037736		FBgn0034230
FBgn0037746		FBgn0037188
FBgn0037747		FBgn0038237
FBgn0037758		FBgn0085370
FBgn0037763		FBgn0030693
FBgn0037766		FBgn0052581
FBgn0037770		FBgn0052847
FBgn0037782		FBgn0003090
FBgn0037808		FBgn0028642
FBgn0037829		FBgn0037344
FBgn0037849		FBgn0020312
FBgn0037872		FBgn0026869
FBgn0037890		FBgn0033539
FBgn0037895		FBgn0036493
FBgn0037933		FBgn0036764
FBgn0037944		FBgn0037203
FBgn0037949		FBgn0039710
FBgn0037956		FBgn0035871
FBgn0037972		FBgn0034281
FBgn0037980		FBgn0050429
FBgn0037994		FBgn0030802
FBgn0038033		FBgn0036340
FBgn0038058		FBgn0003002
FBgn0038095		FBgn0015372
FBgn0038110		FBgn0033260
FBgn0038139		FBgn0004583
FBgn0038160		FBgn0250755
FBgn0038166		FBgn0010803
FBgn0038181		FBgn0038220
FBgn0038194		FBgn0035488
FBgn0038208		FBgn0052529
FBgn0038237		FBgn0003721
FBgn0038286		FBgn0004117
FBgn0038295		FBgn0013984
FBgn0038296		FBgn0014906
FBgn0038315		FBgn0032752
FBgn0038344		FBgn0038279
FBgn0038357		FBgn0010812
FBgn0038360		FBgn0038659
FBgn0038371		FBgn0026567
FBgn0038376		FBgn0036300
FBgn0038396		FBgn0027945
FBgn0038404		FBgn0046296
FBgn0038432		FBgn0260401
FBgn0038438		FBgn0029157
FBgn0038453		FBgn0000319
FBgn0038454		FBgn0031681
FBgn0038460		FBgn0031782
FBgn0038463		FBgn0027509
FBgn0038471		FBgn0036134
FBgn0038512		FBgn0003042
FBgn0038549		FBgn0037944
FBgn0038570		FBgn0027607
FBgn0038571		FBgn0005563
FBgn0038588		FBgn0004656
FBgn0038593		FBgn0038286
FBgn0038603		FBgn0032387
FBgn0038606		FBgn0035528
FBgn0038652		FBgn0000108
FBgn0038680		FBgn0038968
FBgn0038682		FBgn0032721
FBgn0038683		FBgn0010825
FBgn0038686		FBgn0045852
FBgn0038736		FBgn0261547
FBgn0038745		FBgn0261563
FBgn0038747		FBgn0024183
FBgn0038752		FBgn0046214
FBgn0038761		FBgn0085787
FBgn0038762		FBgn0000504
FBgn0038799		FBgn0024250
FBgn0038809		FBgn0035523
FBgn0038815		FBgn0034308
FBgn0038816		FBgn0015776
FBgn0038818		FBgn0032946
FBgn0038826		FBgn0031094
FBgn0038828		FBgn0025456
FBgn0038839		FBgn0032746
FBgn0038853		FBgn0036405
FBgn0038865		FBgn0039743
FBgn0038877		FBgn0000448
FBgn0038880		FBgn0052758
FBgn0038912		FBgn0086908
FBgn0038917		FBgn0034282
FBgn0038922		FBgn0015014
FBgn0038928		FBgn0261086
FBgn0038938		FBgn0037989
FBgn0038965		FBgn0017549
FBgn0039002		FBgn0003178
FBgn0039041		FBgn0031462
FBgn0039054		FBgn0038258
FBgn0039066		FBgn0038952
FBgn0039068		FBgn0033486
FBgn0039074		FBgn0036005
FBgn0039130		FBgn0085388
FBgn0039141		FBgn0023081
FBgn0039157		FBgn0019947
FBgn0039178		FBgn0039938
FBgn0039182		FBgn0004242
FBgn0039187		FBgn0002985
FBgn0039190		FBgn0004892
FBgn0039203		FBgn0004893
FBgn0039209		FBgn0259099
FBgn0039246		FBgn0086698
FBgn0039252		FBgn0036548
FBgn0039260		FBgn0038856
FBgn0039283		FBgn0039136
FBgn0039296		FBgn0033309
FBgn0039321		FBgn0028836
FBgn0039335		FBgn0035111
FBgn0039339		FBgn0038827
FBgn0039354		FBgn0033882
FBgn0039356		FBgn0028888
FBgn0039402		FBgn0260748
FBgn0039415		FBgn0004047
FBgn0039430		FBgn0005391
FBgn0039431		FBgn0030162
FBgn0039449		FBgn0030827
FBgn0039489		FBgn0030828
FBgn0039492		FBgn0031405
FBgn0039525		FBgn0031426
FBgn0039540		FBgn0031976
FBgn0039590		FBgn0032029
FBgn0039594		FBgn0032289
FBgn0039619		FBgn0032612
FBgn0039637		FBgn0032973
FBgn0039644		FBgn0034166
FBgn0039664		FBgn0035453
FBgn0039696		FBgn0036367
FBgn0039727		FBgn0036977
FBgn0039738		FBgn0038398
FBgn0039740		FBgn0039344
FBgn0039741		FBgn0039470
FBgn0039742		FBgn0039471
FBgn0039756		FBgn0039472
FBgn0039759		FBgn0039473
FBgn0039789		FBgn0039474
FBgn0039799		FBgn0039475
FBgn0039804		FBgn0039476
FBgn0039805		FBgn0085476
FBgn0039854		FBgn0085477
FBgn0039882		FBgn0250847
FBgn0039883		FBgn0036813
FBgn0039890		FBgn0001324
FBgn0039897		FBgn0035181
FBgn0039902		FBgn0030055
FBgn0039904		FBgn0051004
FBgn0039905		FBgn0033192
FBgn0039908		FBgn0032120
FBgn0039923		FBgn0031189
FBgn0039966		FBgn0000404
FBgn0040005		FBgn0031684
FBgn0040009		FBgn0035333
FBgn0040031		FBgn0027279
FBgn0040056		FBgn0039525
FBgn0040071		FBgn0030631
FBgn0040076		FBgn0004449
FBgn0040077		FBgn0259240
FBgn0040236		FBgn0027597
FBgn0040238		FBgn0051158
FBgn0040297		FBgn0031877
FBgn0040298		FBgn0030349
FBgn0040299		FBgn0038721
FBgn0040305		FBgn0014163
FBgn0040319		FBgn0024432
FBgn0040339		FBgn0038926
FBgn0040344		FBgn0025936
FBgn0040347		FBgn0035336
FBgn0040368		FBgn0085408
FBgn0040375		FBgn0036734
FBgn0040383		FBgn0039014
FBgn0040487		FBgn0010355
FBgn0040496		FBgn0011202
FBgn0040505		FBgn0036030
FBgn0040508		FBgn0259216
FBgn0040571		FBgn0039561
FBgn0040590		FBgn0026620
FBgn0040606		FBgn0039427
FBgn0040687		FBgn0017482
FBgn0040723		FBgn0031589
FBgn0040752		FBgn0042094
FBgn0040755		FBgn0035400
FBgn0040777		FBgn0037003
FBgn0040809		FBgn0037004
FBgn0040832		FBgn0037005
FBgn0040992		FBgn0032469
FBgn0040995		FBgn0032473
FBgn0041094		FBgn0038746
FBgn0041156		FBgn0086445
FBgn0041160		FBgn0033457
FBgn0041585		FBgn0052103
FBgn0041604		FBgn0030037
FBgn0042094		FBgn0000163
FBgn0042103		FBgn0030687
FBgn0042135		FBgn0004573
FBgn0042174		FBgn0022246
FBgn0042182		FBgn0004873
FBgn0042185		FBgn0038833
FBgn0042696		FBgn0037606
FBgn0043002		FBgn0010356
FBgn0043070		FBgn0011569
FBgn0043364		FBgn0039269
FBgn0043904		FBgn0031284
FBgn0044328		FBgn0261549
FBgn0044419		FBgn0004362
FBgn0044452		FBgn0010228
FBgn0044826		FBgn0010278
FBgn0044871		FBgn0034085
FBgn0045035		FBgn0031973
FBgn0045064		FBgn0039228
FBgn0045073		FBgn0051294
FBgn0045476		FBgn0085303
FBgn0046113		FBgn0085326
FBgn0046763		FBgn0036932
FBgn0046875		FBgn0027951
FBgn0050015		FBgn0035872
FBgn0050035		FBgn0035802
FBgn0050055		FBgn0039261
FBgn0050158		FBgn0028480
FBgn0050185		FBgn0010395
FBgn0050343		FBgn0036715
FBgn0050361		FBgn0037963
FBgn0050377		FBgn0024491
FBgn0050389		FBgn0010621
FBgn0050412		FBgn0038871
FBgn0050458		FBgn0027359
FBgn0050472		FBgn0031408
FBgn0050490		FBgn0024985
FBgn0050503		FBgn0001991
FBgn0051038		FBgn0039681
FBgn0051064		FBgn0005278
FBgn0051072		FBgn0015218
FBgn0051092		FBgn0035709
FBgn0051122		FBgn0035823
FBgn0051140		FBgn0035860
FBgn0051163		FBgn0039622
FBgn0051183		FBgn0040368
FBgn0051204		FBgn0003749
FBgn0051211		FBgn0050051
FBgn0051217		FBgn0032986
FBgn0051224		FBgn0039702
FBgn0051313		FBgn0050372
FBgn0051323		FBgn0032221
FBgn0051337		FBgn0033000
FBgn0051342		FBgn0038651
FBgn0051463		FBgn0020392
FBgn0051475		FBgn0035397
FBgn0051481		FBgn0033373
FBgn0051495		FBgn0003970
FBgn0051530		FBgn0036499
FBgn0051531		FBgn0019662
FBgn0051637		FBgn0030466
FBgn0051643		FBgn0040929
FBgn0051647		FBgn0050410
FBgn0051712		FBgn0000464
FBgn0051729		FBgn0039831
FBgn0051739		FBgn0030467
FBgn0051760		FBgn0024230
FBgn0051782		FBgn0002543
FBgn0051846		FBgn0005631
FBgn0051849		FBgn0041097
FBgn0051870		FBgn0032397
FBgn0051871		FBgn0040918
FBgn0051973		FBgn0000578
FBgn0051998		FBgn0002441
FBgn0052062		FBgn0035202
FBgn0052085		FBgn0051812
FBgn0052091		FBgn0261111
FBgn0052105		FBgn0015797
FBgn0052111		FBgn0036622
FBgn0052118		FBgn0037339
FBgn0052121		FBgn0036239
FBgn0052138		FBgn0034269
FBgn0052159		FBgn0000256
FBgn0052160		FBgn0037647
FBgn0052177		FBgn0031397
FBgn0052206		FBgn0029830
FBgn0052207		FBgn0001308
FBgn0052219		FBgn0023522
FBgn0052226		FBgn0042185
FBgn0052227		FBgn0003390
FBgn0052262		FBgn0003429
FBgn0052264		FBgn0030946
FBgn0052281		FBgn0050338
FBgn0052306		FBgn0085447
FBgn0052406		FBgn0034598
FBgn0052447		FBgn0038902
FBgn0052451		FBgn0085478
FBgn0052473		FBgn0027335
FBgn0052512		FBgn0035073
FBgn0052594		FBgn0001942
FBgn0052600		FBgn0037857
FBgn0052613		FBgn0051679
FBgn0052627		FBgn0035383
FBgn0052635		FBgn0028859
FBgn0052647		FBgn0028863
FBgn0052662		FBgn0261041
FBgn0052683		FBgn0038524
FBgn0052694		FBgn0033054
FBgn0052707		FBgn0052138
FBgn0052758		FBgn0035122
FBgn0052791		FBgn0003308
FBgn0052823		FBgn0039208
FBgn0052843		FBgn0036214
FBgn0052850		FBgn0010905
FBgn0053007		FBgn0003654
FBgn0053057		FBgn0052823
FBgn0053080		FBgn0053497
FBgn0053097		FBgn0053499
FBgn0053144		FBgn0067861
FBgn0053147		FBgn0031377
FBgn0053170		FBgn0030009
FBgn0053182		FBgn0037716
FBgn0053192		FBgn0029896
FBgn0053193		FBgn0030331
FBgn0053197		FBgn0037829
FBgn0053203		FBgn0038448
FBgn0053208		FBgn0040350
FBgn0053214		FBgn0051103
FBgn0053340		FBgn0051106
FBgn0053531		FBgn0051272
FBgn0053542		FBgn0053234
FBgn0053543		FBgn0030235
FBgn0053635		FBgn0036211
FBgn0053653		FBgn0034503
FBgn0053969		FBgn0261112
FBgn0053970		FBgn0035076
FBgn0053993		FBgn0020269
FBgn0058006		FBgn0025836
FBgn0061492		FBgn0033429
FBgn0062412		FBgn0031054
FBgn0063485		FBgn0010768
FBgn0064115		FBgn0032934
FBgn0064119		FBgn0259737
FBgn0064126		FBgn0024277
FBgn0065097		FBgn0034611
FBgn0067895		FBgn0017457
FBgn0083940		FBgn0032329
FBgn0083949		FBgn0036533
FBgn0083954		FBgn0040080
FBgn0083962		FBgn0032488
FBgn0083963		FBgn0043458
FBgn0083967		FBgn0023528
FBgn0083976		FBgn0039223
FBgn0083992		FBgn0030832
FBgn0085342		FBgn0033679
FBgn0085370		FBgn0028331
FBgn0085373		FBgn0033088
FBgn0085387		FBgn0052441
FBgn0085395		FBgn0034962
FBgn0085408		FBgn0032901
FBgn0085421		FBgn0035830
FBgn0085424		FBgn0011276
FBgn0085428		FBgn0028833
FBgn0085432		FBgn0086675
FBgn0085434		FBgn0260400
FBgn0085442		FBgn0031437
FBgn0086358		FBgn0039234
FBgn0086364		FBgn0036274
FBgn0086370		FBgn0052105
FBgn0086445		FBgn0013987
FBgn0086656		FBgn0037094
FBgn0086657		FBgn0260450
FBgn0086708		FBgn0261269
FBgn0086711		FBgn0000577
FBgn0086757		FBgn0001269
FBgn0086758		FBgn0038042
FBgn0086779		FBgn0016797
FBgn0086899		FBgn0038256
FBgn0087013		FBgn0039765
FBgn0243486		FBgn0033813
FBgn0243517		FBgn0037849
FBgn0250851		FBgn0051460
FBgn0250910		FBgn0001079
FBgn0259109		FBgn0260746
FBgn0259144		FBgn0022131
FBgn0259166		FBgn0034763
FBgn0259168		FBgn0043362
FBgn0259176		FBgn0015756
FBgn0259221		FBgn0034572
FBgn0259226		FBgn0037855
FBgn0259227		FBgn0033915
FBgn0259482		FBgn0031735
FBgn0259678		FBgn0036939
FBgn0259699		FBgn0031975
FBgn0259700		FBgn0034057
FBgn0259708		FBgn0039943
FBgn0259711		FBgn0027564
FBgn0259736		FBgn0039227
FBgn0259994		FBgn0031664
FBgn0260398		FBgn0039219
FBgn0260451		FBgn0014388
FBgn0260458		FBgn0000640
FBgn0260466		FBgn0011693
FBgn0260467		FBgn0036620
FBgn0260470		FBgn0042137
FBgn0260475		FBgn0086706
FBgn0260634		FBgn0003023
FBgn0260642		FBgn0031622
FBgn0260744		FBgn0039280
FBgn0260934		FBgn0026401
FBgn0260935		FBgn0034002
FBgn0260938		FBgn0014877
FBgn0260942		FBgn0031006
FBgn0260944		FBgn0036728
FBgn0260945		FBgn0004403
FBgn0260964		FBgn0004404
FBgn0260966		FBgn0028428
FBgn0260986		FBgn0035035
FBgn0261015		FBgn0038960
FBgn0261085		FBgn0003301
FBgn0261086		FBgn0260987
FBgn0261239		FBgn0033107
FBgn0261259		FBgn0013576
FBgn0261360		FBgn0034964
FBgn0261383		FBgn0051643
FBgn0261397		FBgn0015907
FBgn0261549		FBgn0032820
FBgn0261552		FBgn0033068
FBgn0261553		FBgn0030286
FBgn0261554		FBgn0034346
FBgn0261555		FBgn0011785
FBgn0261556		FBgn0261383
FBgn0261557		FBgn0035643
FBgn0261558		FBgn0035983
FBgn0261563		FBgn0030951
FBgn0261565		FBgn0033377
FBgn0261787		FBgn0026317
FBgn0261794		FBgn0011829
FBgn0261808		FBgn0036686
FBgn0261823		FBgn0037321
FBgn0261836		FBgn0039714
FBgn0263097		FBgn0032394
FBgn0263112		FBgn0030478
FBgn0263289		FBgn0027550
FBgn0264493		FBgn0032042
		FBgn0051729
		FBgn0036579
		FBgn0003091
		FBgn0004784
		FBgn0039522
		FBgn0032151
		FBgn0040228
		FBgn0030768
		FBgn0030582
		FBgn0053276
		FBgn0045073
		FBgn0011703
		FBgn0029720
		FBgn0030013
		FBgn0050503
		FBgn0250862
		FBgn0011272
		FBgn0015872
		FBgn0033635
		FBgn0002924
		FBgn0032395
		FBgn0003326
		FBgn0037299
		FBgn0051155
		FBgn0052425
		FBgn0036398
		FBgn0001202
		FBgn0031428
		FBgn0040513
		FBgn0036775
		FBgn0016917
		FBgn0034059
		FBgn0027599
		FBgn0260994
		FBgn0054001
		FBgn0037130
		FBgn0002931
		FBgn0028535
		FBgn0033984
		FBgn0034753
		FBgn0034542
		FBgn0250823
		FBgn0022764
		FBgn0010415
		FBgn0037822
		FBgn0037492
		FBgn0011582
		FBgn0011591
		FBgn0020249
		FBgn0038569
		FBgn0033500
		FBgn0031903
		FBgn0043364
		FBgn0003963
		FBgn0029801
		FBgn0001297
		FBgn0015904
		FBgn0015919
		FBgn0259978
		FBgn0034459
		FBgn0039501
		FBgn0040634
		FBgn0022768
		FBgn0050108
		FBgn0050109
		FBgn0005613
		FBgn0028663
		FBgn0028664
		FBgn0035521
		FBgn0038458
		FBgn0003093
		FBgn0041184
		FBgn0025640
		FBgn0032424
		FBgn0036566
		FBgn0085433
		FBgn0030569
		FBgn0032050
		FBgn0000541
		FBgn0259234
		FBgn0036478
		FBgn0038269
		FBgn0026379
		FBgn0033089
		FBgn0037703
		FBgn0027932
		FBgn0038421
		FBgn0030876
		FBgn0086907
		FBgn0000071
		FBgn0017590
		FBgn0025878
		FBgn0031627
		FBgn0037107
		FBgn0053543
		FBgn0085382
		FBgn0042135
		FBgn0020762
		FBgn0025683
		FBgn0031362
		FBgn0031449
		FBgn0031516
		FBgn0032167
		FBgn0052091
		FBgn0010620
		FBgn0037391
		FBgn0032451
		FBgn0028509
		FBgn0032117
		FBgn0031020
		FBgn0036534
		FBgn0040007
		FBgn0023458
		FBgn0050105
		FBgn0038407
		FBgn0011768
		FBgn0040294
		FBgn0039273
		FBgn0037469
		FBgn0037555
		FBgn0260798
		FBgn0000459
		FBgn0042650
		FBgn0034239
		FBgn0037659
		FBgn0031079
		FBgn0260387
		FBgn0037613
		FBgn0015838
		FBgn0030477
		FBgn0002783
		FBgn0038965
		FBgn0032683
		FBgn0250786
		FBgn0027580
		FBgn0035677
		FBgn0039254
		FBgn0037845
		FBgn0036928
		FBgn0037828
		FBgn0035272
		FBgn0034959
		FBgn0043010
		FBgn0260462
		FBgn0005511
		FBgn0016660
		FBgn0033187
		FBgn0004551
		FBgn0035741
		FBgn0010246
		FBgn0039411
		FBgn0016762
		FBgn0036544
		FBgn0029756
		FBgn0034075
		FBgn0035392
		FBgn0026238
		FBgn0035944
		FBgn0032702
		FBgn0021825
		FBgn0036556
		FBgn0027948
		FBgn0261108
		FBgn0037819
		FBgn0030058
		FBgn0033069
		FBgn0037270
		FBgn0034650
		FBgn0032940
		FBgn0039225
		FBgn0052082
		FBgn0025381
		FBgn0003559
		FBgn0034744
		FBgn0050036
		FBgn0050037
		FBgn0053145
		FBgn0086347
		FBgn0029945
		FBgn0024920
		FBgn0039930
		FBgn0037710
		FBgn0045064
		FBgn0031768
		FBgn0029095
		FBgn0023525
		FBgn0029608
		FBgn0029863
		FBgn0033434
		FBgn0033437
		FBgn0035636
		FBgn0036289
		FBgn0037323
		FBgn0038966
		FBgn0039106
		FBgn0039864
		FBgn0050339
		FBgn0051636
		FBgn0053514
		FBgn0053965
		FBgn0053966
		FBgn0015268
		FBgn0025186
		FBgn0260743
		FBgn0046706
		FBgn0022153
		FBgn0033569
		FBgn0050020
		FBgn0028292
		FBgn0034537
		FBgn0034051
		FBgn0030855
		FBgn0013948
		FBgn0053172
		FBgn0033807
		FBgn0000964
		FBgn0038736
		FBgn0020887
		FBgn0034367
		FBgn0031769
		FBgn0027574
		FBgn0036735
		FBgn0033880
		FBgn0032515
		FBgn0027546
		FBgn0035593
		FBgn0037185
		FBgn0035283
		FBgn0023507
		FBgn0038354
		FBgn0040372
		FBgn0039827
		FBgn0037445
		FBgn0037567
		FBgn0037610
		FBgn0038330
		FBgn0033785
		FBgn0034071
		FBgn0051151
		FBgn0031401
		FBgn0020245
		FBgn0259481
		FBgn0031519
		FBgn0035892
		FBgn0031575
		FBgn0030790
		FBgn0037743
		FBgn0031318
		FBgn0031319
		FBgn0037328
		FBgn0035189
		FBgn0063667
		FBgn0011571
		FBgn0037939
		FBgn0036318
		FBgn0035519
		FBgn0015399
		FBgn0015400
		FBgn0028370
		FBgn0031016
		FBgn0032484
		FBgn0039862
		FBgn0039920
		FBgn0052732
		FBgn0034894
		FBgn0032647
		FBgn0032648
		FBgn0032649
		FBgn0003285
		FBgn0028369
		FBgn0000489
		FBgn0011474
		FBgn0011589
		FBgn0030347
		FBgn0259923
		FBgn0053105
		FBgn0069242
		FBgn0034535
		FBgn0031716
		FBgn0013435
		FBgn0041100
		FBgn0010407
		FBgn0000721
		FBgn0033692
		FBgn0002283
		FBgn0086359
		FBgn0011837
		FBgn0039955
		FBgn0046873
		FBgn0000183
		FBgn0004390
		FBgn0016984
		FBgn0030034
		FBgn0086447
		FBgn0029911
		FBgn0035057
		FBgn0036302
		FBgn0052296
		FBgn0003132
		FBgn0003134
		FBgn0004103
		FBgn0038506
		FBgn0027338
		FBgn0004896
		FBgn0086384
		FBgn0083986
		FBgn0027791
		FBgn0259824
		FBgn0053111
		FBgn0051617
		FBgn0053801
		FBgn0053804
		FBgn0053807
		FBgn0053810
		FBgn0053813
		FBgn0053816
		FBgn0053819
		FBgn0053822
		FBgn0053825
		FBgn0053828
		FBgn0053831
		FBgn0053834
		FBgn0053837
		FBgn0053840
		FBgn0053843
		FBgn0053846
		FBgn0053849
		FBgn0053852
		FBgn0053855
		FBgn0053858
		FBgn0053861
		FBgn0053864
		FBgn0035878
		FBgn0031855
		FBgn0034137
		FBgn0030366
		FBgn0030886
		FBgn0032330
		FBgn0032252
		FBgn0035390
		FBgn0052056
		FBgn0004360
		FBgn0010014
		FBgn0015614
		FBgn0053108
		FBgn0259244
		FBgn0002962
		FBgn0035997
		FBgn0034447
		FBgn0036206
		FBgn0005617
		FBgn0032524
		FBgn0052230
		FBgn0039135
		FBgn0040273
		FBgn0031093
		FBgn0260481
		FBgn0031866
		FBgn0083963
		FBgn0083975
		FBgn0034274
		FBgn0040066
		FBgn0036111
		FBgn0003138
		FBgn0061361
		FBgn0035849
		FBgn0031492
		FBgn0026059
		FBgn0035140
		FBgn0000413
		FBgn0032470
		FBgn0033177
		FBgn0015770
		FBgn0032095
		FBgn0259142
		FBgn0030894
		FBgn0039429
		FBgn0028894
		FBgn0034534
		FBgn0034355
		FBgn0029789
		FBgn0030403
		FBgn0028690
		FBgn0028904
		FBgn0028906
		FBgn0035347
		FBgn0259749
		FBgn0027655
		FBgn0030391
		FBgn0034410
		FBgn0024947
		FBgn0030810
		FBgn0031741
		FBgn0031835
		FBgn0040017
		FBgn0259175
		FBgn0250789
		FBgn0036348
		FBgn0031875
		FBgn0035966
		FBgn0003392
		FBgn0030067
		FBgn0036451
		FBgn0040346
		FBgn0023083
		FBgn0037894
		FBgn0025726
		FBgn0029006
		FBgn0051915
		FBgn0053513
		FBgn0025592
		FBgn0033673
		FBgn0035266
		FBgn0261276
		FBgn0031529
		FBgn0037980
		FBgn0004924
		FBgn0037338
		FBgn0034110
		FBgn0261555
		FBgn0012051
		FBgn0037341
		FBgn0024993
		FBgn0037603
		FBgn0023508
		FBgn0039936
		FBgn0260660
		FBgn0000611
		FBgn0030330
		FBgn0000259
		FBgn0030321
		FBgn0053180
		FBgn0034692
		FBgn0003475
		FBgn0029849
		FBgn0039641
		FBgn0039858
		FBgn0026376
		FBgn0027842
		FBgn0037611
		FBgn0020386
		FBgn0003744
		FBgn0033528
		FBgn0020496
		FBgn0036219
		FBgn0030676
		FBgn0030679
		FBgn0034249
		FBgn0050010
		FBgn0041629
		FBgn0041630
		FBgn0045063
		FBgn0050423
		FBgn0003410
		FBgn0030995
		FBgn0038149
		FBgn0001319
		FBgn0024365
		FBgn0040394
		FBgn0023216
		FBgn0003900
		FBgn0040335
		FBgn0032881
		FBgn0036921
		FBgn0037182
		FBgn0260467
		FBgn0259991
		FBgn0040319
		FBgn0037116
		FBgn0037880
		FBgn0034421
		FBgn0037467
		FBgn0005696
		FBgn0051251
		FBgn0052451
		FBgn0035232
		FBgn0034876
		FBgn0037726
		FBgn0003366
		FBgn0035965
		FBgn0024194
		FBgn0020660
		FBgn0036279
		FBgn0051547
		FBgn0000320
		FBgn0015025
		FBgn0028475
		FBgn0243505
		FBgn0014861
		FBgn0038744
		FBgn0034060
		FBgn0035165
		FBgn0034491
		FBgn0035440
		FBgn0032671
		FBgn0051612
		FBgn0028479
		FBgn0033247
		FBgn0037220
		FBgn0032005
		FBgn0036564
		FBgn0038686
		FBgn0086532
		FBgn0002968
		FBgn0022355
		FBgn0036299
		FBgn0023167
		FBgn0034261
		FBgn0033155
		FBgn0036624
		FBgn0028471
		FBgn0033209
		FBgn0086656
		FBgn0036305
		FBgn0087012
		FBgn0003319
		FBgn0031619
		FBgn0033359
		FBgn0033362
		FBgn0033363
		FBgn0033365
		FBgn0035501
		FBgn0036427
		FBgn0036891
		FBgn0039272
		FBgn0052260
		FBgn0085379
		FBgn0029094
		FBgn0035831
		FBgn0000473
		FBgn0013771
		FBgn0013772
		FBgn0013773
		FBgn0015038
		FBgn0015039
		FBgn0015040
		FBgn0015714
		FBgn0025454
		FBgn0028940
		FBgn0030339
		FBgn0031126
		FBgn0031182
		FBgn0031432
		FBgn0031688
		FBgn0031689
		FBgn0033065
		FBgn0033121
		FBgn0033304
		FBgn0033696
		FBgn0033697
		FBgn0033775
		FBgn0033978
		FBgn0033979
		FBgn0033981
		FBgn0033982
		FBgn0034756
		FBgn0038037
		FBgn0038194
		FBgn0039006
		FBgn0039519
		FBgn0041337
		FBgn0045862
[truncated: 283 more rows]
