# Supplementary material for: An Intronic microRNA Links Rb/E2F and EGFR Signaling
Source: PLoS Genet. 2014 Jul 24;10(7):e1004493. doi: 10.1371/journal.pgen.1004493 (PMC4109884; doi:10.1371/journal.pgen.1004493)
Supplement: Table S2 — GOBP enrichment analysis of DE genes in mir-998 mutants. (XLSX) [file pgen.1004493.s006.xlsx]

## Sheet: Table S2 GOBP enrichment
Experimental Condition	Process/Term	Total Number of genes with this term	Expected average (by chance) number of genes with this term in this condition	Expected Standard Deviation	Observed Number of genes for the term in this condition	p-value	corrected p-value
mir11	eye_photoreceptor_cell_differentiation	117	10.3496	3.07149	25	2.8764198781286598E-5	0.00101825
mir11	transmembrane_receptor_protein_tyrosine_kinase_signaling_pathway	117	10.3496	3.07149	25	2.8764198781286598E-5	0.00101825
mir11	response_to_light_stimulus	83	7.34201	2.587	20	2.8761765977713296E-5	0.00107175
mir11	female_meiosis	59	5.21902	2.18114	16	3.780192150457922E-5	0.00121653
mir11	positive_regulation_of_developmental_process	59	5.21902	2.18114	16	3.780192150457922E-5	0.00121653
mir11	antennal_development	21	1.85762	1.30127	9	3.620659939130265E-5	0.00122068
mir11	head_segmentation	22	1.94608	1.33189	9	5.6449535980755365E-5	0.00159865
mir11	regulation_of_hemocyte_differentiation	22	1.94608	1.33189	9	5.6449535980755365E-5	0.00159865
mir11	compound_eye_photoreceptor_cell_differentiation	114	10.0842	3.03186	24	5.290926424040258E-5	0.00162869
mir11	midgut_development	27	2.38837	1.4755	10	6.005820604031521E-5	0.00163543
mir11	peripheral_nervous_system_development	80	7.07664	2.53981	19	5.578852801093771E-5	0.00164576
mir11	morphogenesis_of_embryonic_epithelium	102	9.02271	2.86785	22	7.264552765556736E-5	0.00190493
mir11	organ_formation	44	3.89215	1.88358	13	7.55345581339398E-5	0.00190995
mir11	formation_of_organ_boundary	44	3.89215	1.88358	13	7.55345581339398E-5	0.00190995
mir11	negative_regulation_of_cell_proliferation	28	2.47682	1.50257	10	8.601372301812766E-5	0.00209992
mir11	hemocyte_differentiation	34	3.00757	1.65576	11	1.077527935732368E-4	0.00254297
mir11	induction_of_apoptosis	24	2.12299	1.39111	9	1.2597426201952275E-4	0.00287709
mir11	regulation_of_apoptosis	86	7.60739	2.63333	19	1.5686158583193513E-4	0.00347056
mir11	cation_homeostasis	30	2.65374	1.55531	10	1.6696498512553626E-4	0.0034768
mir11	positive_regulation_of_apoptosis	30	2.65374	1.55531	10	1.6696498512553626E-4	0.0034768
mir11	hemopoietic_or_lymphoid_organ_development	66	5.83823	2.3069	16	1.622337146013022E-4	0.00348065
mir11	immune_system_development	66	5.83823	2.3069	16	1.622337146013022E-4	0.00348065
mir11	cellularization	67	5.92669	2.32431	16	1.957405615829711E-4	0.00384956
mir11	hemopoiesis	54	4.77673	2.08667	14	1.9169932124311616E-4	0.0038778
mir11	head_involution	37	3.27295	1.72726	11	2.5098514134656093E-4	0.00467625
mir11	Wnt_receptor_signaling_pathway	75	6.63435	2.45916	17	2.4620976140703513E-4	0.00471126
mir11	di-,_tri-valent_inorganic_cation_transport	38	3.3614	1.75045	11	3.251279882834272E-4	0.00590232
mir11	dephosphorylation	113	9.99575	3.01853	22	3.4466305869650533E-4	0.00610054
mir11	torso_signaling_pathway	33	2.91911	1.63122	10	4.018150678179058E-4	0.00677345
mir11	dorsal_closure	85	7.51893	2.61798	18	4.0097674762536655E-4	0.00692418
mir11	regulation_of_Wnt_receptor_signaling_pathway	28	2.47682	1.50257	9	4.8017481415860744E-4	0.00790613
mir11	M_phase_of_meiotic_cell_cycle	116	10.2611	3.05834	22	5.031100760141393E-4	0.0080955
mir11	meiosis	116	10.2611	3.05834	22	5.031100760141393E-4	0.0080955
mir11	retinal_cell_programmed_cell_death	23	2.03453	1.36182	8	5.43610095634144E-4	0.00836687
mir11	sperm_individualization	23	2.03453	1.36182	8	5.43610095634144E-4	0.00836687
mir11	response_to_steroid_hormone_stimulus	23	2.03453	1.36182	8	5.43610095634144E-4	0.00836687
mir11	response_to_ecdysone	23	2.03453	1.36182	8	5.43610095634144E-4	0.00836687
mir11	protein_amino_acid_dephosphorylation	87	7.69584	2.6486	18	5.390103982529592E-4	0.00848043
mir11	detection_of_external_stimulus	60	5.30748	2.19954	14	6.179944910984822E-4	0.00930936
mir11	developmental_programmed_cell_death	29	2.56528	1.52917	9	6.4185729165468E-4	0.0094674
mir11	regulation_of_cell_proliferation	48	4.24598	1.96733	12	7.704487775305943E-4	0.0106956
mir11	gut_development	68	6.01514	2.34159	15	7.553945903189113E-4	0.0106964
mir11	regulation_of_antimicrobial_peptide_biosynthetic_process	24	2.12299	1.39111	8	7.524280124414547E-4	0.0108718
mir11	positive_regulation_of_antimicrobial_peptide_biosynthetic_process	24	2.12299	1.39111	8	7.524280124414547E-4	0.0108718
mir11	antimicrobial_peptide_biosynthetic_process	24	2.12299	1.39111	8	7.524280124414547E-4	0.0108718
mir11	antimicrobial_peptide_production	24	2.12299	1.39111	8	7.524280124414547E-4	0.0108718
mir11	production_of_molecular_mediator_of_immune_response	24	2.12299	1.39111	8	7.524280124414547E-4	0.0108718
mir11	ectoderm_development	70	6.19206	2.37578	15	0.0010378	0.0133593
mir11	positive_regulation_of_catalytic_activity	43	3.80369	1.86205	11	0.0010278	0.0134757
mir11	response_to_hormone_stimulus	25	2.21145	1.4198	8	0.00102115	0.0136411
mir11	peptide_biosynthetic_process	25	2.21145	1.4198	8	0.00102115	0.0136411
mir11	negative_regulation_of_cell_differentiation	56	4.95365	2.12496	13	0.00100483	0.0136811
mir11	regulation_of_localization	85	7.51893	2.61798	17	0.00113148	0.0143051
mir11	regulation_of_photoreceptor_cell_differentiation	20	1.76916	1.26991	7	0.0011634	0.0144507
mir11	embryonic_axis_specification	64	5.66131	2.27168	14	0.00121853	0.0148745
mir11	negative_regulation_of_transcription,_DNA-dependent	116	10.2611	3.05834	21	0.00124173	0.0149007
mir11	response_to_endogenous_stimulus	26	2.29991	1.44792	8	0.00136137	0.0158008
mir11	actin_filament_organization	79	6.98818	2.52389	16	0.00135772	0.016021
mir11	regulation_of_cellular_biosynthetic_process	87	7.69584	2.6486	17	0.00147926	0.0168922
mir11	regulation_of_cell_morphogenesis	111	9.81884	2.9917	20	0.00169729	0.0190743
mir11	R7_cell_differentiation	33	2.91911	1.63122	9	0.00178695	0.0197681
mir11	positive_regulation_of_cellular_biosynthetic_process	33	2.91911	1.63122	9	0.00178695	0.0197681
mir11	photoreceptor_cell_morphogenesis	60	5.30748	2.19954	13	0.00196793	0.0211105
mir11	ovarian_follicle_cell_migration	60	5.30748	2.19954	13	0.00196793	0.0211105
mir11	spermatid_differentiation	53	4.68827	2.06726	12	0.00194846	0.0212232
mir11	tissue_death	75	6.63435	2.45916	15	0.00215334	0.0227547
mir11	histolysis	75	6.63435	2.45916	15	0.00215334	0.0227547
mir11	response_to_bacterium	75	6.63435	2.45916	15	0.00215334	0.0227547
mir11	salivary_gland_boundary_specification	22	1.94608	1.33189	7	0.0021858	0.022758
mir11	regulation_of_proteolysis	34	3.00757	1.65576	9	0.00224148	0.0229996
mir11	asymmetric_protein_localization	34	3.00757	1.65576	9	0.00224148	0.0229996
mir11	border_follicle_cell_migration	54	4.77673	2.08667	12	0.00230619	0.0233254
mir11	membrane_lipid_metabolic_process	91	8.04968	2.7088	17	0.00244889	0.0244199
mir11	neuron_recognition	48	4.24598	1.96733	11	0.0026753	0.0263071
mir11	tripartite_regional_subdivision	55	4.86519	2.1059	12	0.00271569	0.0263385
mir11	determination_of_anterior/posterior_axis,_embryo	55	4.86519	2.1059	12	0.00271569	0.0263385
mir11	carbohydrate_biosynthetic_process	55	4.86519	2.1059	12	0.00271569	0.0263385
mir11	detection_of_abiotic_stimulus	55	4.86519	2.1059	12	0.00271569	0.0263385
mir11	negative_regulation_of_transcription_from_RNA_polymerase_II_promoter	55	4.86519	2.1059	12	0.00271569	0.0263385
mir11	positive_regulation_of_macromolecule_metabolic_process	108	9.55346	2.951	19	0.00288968	0.0276472
mir11	adult_locomotory_behavior	42	3.71524	1.84027	10	0.00305897	0.0288766
mir11	compound_eye_photoreceptor_development	56	4.95365	2.12496	12	0.00318229	0.0292606
mir11	cell_recognition	49	4.33444	1.98772	11	0.00317793	0.0296049
mir11	chemosensory_behavior	86	7.60739	2.63333	16	0.00337254	0.0306123
mir11	imaginal_disc_pattern_formation	94	8.31505	2.75309	17	0.0034827	0.0312121
mir11	eye_photoreceptor_cell_development	57	5.04211	2.14385	12	0.00371159	0.0312834
mir11	photoreceptor_cell_development	64	5.66131	2.27168	13	0.00358818	0.0313634
mir11	anterior/posterior_axis_specification	118	10.438	3.08459	20	0.00356017	0.0315075
mir11	calcium_ion_transport	30	2.65374	1.55531	8	0.00370532	0.0316068
mir11	positive_regulation_of_signal_transduction	43	3.80369	1.86205	10	0.00367447	0.0317259
mir11	heart_development	72	6.36898	2.40948	14	0.00389772	0.0324657
mir11	immune_effector_process	37	3.27295	1.72726	9	0.00417386	0.0343616
mir11	morphogenesis_of_a_polarized_epithelium	73	6.45743	2.42615	14	0.00443702	0.0361082
mir11	autophagic_cell_death	73	6.45743	2.42615	14	0.00443702	0.0361082
mir11	salivary_gland_histolysis	73	6.45743	2.42615	14	0.00443702	0.0361082
mir11	salivary_gland_cell_autophagic_cell_death	73	6.45743	2.42615	14	0.00443702	0.0361082
mir11	detection_of_stimulus	81	7.1651	2.55564	15	0.00465142	0.0370023
mir11	female_meiosis_chromosome_segregation	31	2.7422	1.58102	8	0.00461209	0.0371063
mir11	peptide_metabolic_process	31	2.7422	1.58102	8	0.00461209	0.0371063
mir11	ovarian_nurse_cell_to_oocyte_transport	38	3.3614	1.75045	9	0.0050465	0.0396991
mir11	olfactory_behavior	82	7.25355	2.57137	15	0.00523614	0.0407383
mir11	positive_regulation_of_transcription	91	8.04968	2.7088	16	0.0059709	0.0449723
mir11	protein_kinase_cascade	83	7.34201	2.587	15	0.00587888	0.0452418
mir11	establishment_and/or_maintenance_of_cell_polarity	107	9.465	2.9373	18	0.0059503	0.045299
mir11	cellular_cation_homeostasis	26	2.29991	1.44792	7	0.00615881	0.0454213
mir11	regulation_of_cell_fate_specification	20	1.76916	1.26991	6	0.00624125	0.0455547
mir11	detection_of_stimulus_involved_in_sensory_perception	68	6.01514	2.34159	13	0.0061513	0.0458434
mir11	phospholipid_metabolic_process	76	6.72281	2.4755	14	0.00642584	0.0464234
mir11	positive_regulation_of_gene_expression	92	8.13813	2.72365	16	0.00664679	0.0470592
mir11	positive_regulation_of_macromolecule_biosynthetic_process	100	8.8458	2.8396	17	0.00663437	0.0474458
mir11	innate_immune_response	54	4.77673	2.08667	11	0.00693555	0.0486175
mir11	leg_morphogenesis	40	3.53832	1.79592	9	0.00720953	0.0495567
mir11	smoothened_signaling_pathway	40	3.53832	1.79592	9	0.00720953	0.0495567
mir11	ion_homeostasis	47	4.15753	1.94673	10	0.00717364	0.0497935
mir11	glycerophospholipid_metabolic_process	47	4.15753	1.94673	10	0.00717364	0.0497935
mir11	tracheal_outgrowth,_open_tracheal_system	21	1.85762	1.30127	6	0.00809272	0.0550927
mir11	regulation_of_growth	94	8.31505	2.75309	16	0.00818295	0.0551764
mir11	positive_regulation_of_nucleobase,_nucleoside,_nucleotide_and_nucleic_acid_metabolic_process	94	8.31505	2.75309	16	0.00818295	0.0551764
mir11	exocytosis	63	5.57285	2.25386	12	0.00854825	0.0555244
mir11	imaginal_disc-derived_wing_margin_morphogenesis	34	3.00757	1.65576	8	0.00836662	0.0558827
mir11	antibacterial_humoral_response	41	3.62678	1.81823	9	0.00852608	0.0558932
mir11	limb_morphogenesis	41	3.62678	1.81823	9	0.00852608	0.0558932
mir11	protein_ubiquitination	41	3.62678	1.81823	9	0.00852608	0.0558932
mir11	limb_development	41	3.62678	1.81823	9	0.00852608	0.0558932
mir11	secretion_by_cell	119	10.5265	3.09764	19	0.00846736	0.056027
mir11	developmental_growth	79	6.98818	2.52389	14	0.00906939	0.0583739
mir11	cyclic_nucleotide_metabolic_process	28	2.47682	1.50257	7	0.0094832	0.0604874
mir11	zygotic_determination_of_anterior/posterior_axis,_embryo	28	2.47682	1.50257	7	0.0094832	0.0604874
mir11	neuroblast_differentiation	28	2.47682	1.50257	7	0.0094832	0.0604874
mir11	detection_of_light_stimulus_involved_in_visual_perception	49	4.33444	1.98772	10	0.00968549	0.0612261
mir11	detection_of_light_stimulus_involved_in_sensory_perception	49	4.33444	1.98772	10	0.00968549	0.0612261
mir11	phosphoinositide_metabolic_process	42	3.71524	1.84027	9	0.0100171	0.0627621
mir11	multicellular_organismal_aging	80	7.07664	2.53981	14	0.0101191	0.0628449
mir11	aging	80	7.07664	2.53981	14	0.0101191	0.0628449
mir11	determination_of_adult_life_span	80	7.07664	2.53981	14	0.0101191	0.0628449
mir11	sensory_organ_boundary_specification	22	1.94608	1.33189	6	0.0103078	0.0634603
mir11	detection_of_light_stimulus	50	4.4229	2.0079	10	0.0111685	0.0681662
mir11	detection_of_visible_light	50	4.4229	2.0079	10	0.0111685	0.0681662
mir11	locomotion	29	2.56528	1.52917	7	0.0115643	0.0699787
mir11	mushroom_body_development	43	3.80369	1.86205	9	0.0116961	0.0701763
mir11	regulation_of_neurogenesis	43	3.80369	1.86205	9	0.0116961	0.0701763
mir11	adult_behavior	66	5.83823	2.3069	12	0.0123352	0.0733895
mir11	endosome_transport	23	2.03453	1.36182	6	0.0129208	0.0756029
mir11	positive_regulation_of_protein_kinase_activity	23	2.03453	1.36182	6	0.0129208	0.0756029
mir11	positive_regulation_of_kinase_activity	23	2.03453	1.36182	6	0.0129208	0.0756029
mir11	cellular_di-,_tri-valent_inorganic_cation_homeostasis	23	2.03453	1.36182	6	0.0129208	0.0756029
mir11	positive_regulation_of_transferase_activity	23	2.03453	1.36182	6	0.0129208	0.0756029
mir11	spermatid_development	51	4.51136	2.02788	10	0.012817	0.0756203
mir11	protein_modification_by_small_protein_conjugation	44	3.89215	1.88358	9	0.0135763	0.078787
mir11	amine_transport	37	3.27295	1.72726	8	0.0140389	0.0795162
mir11	establishment_and/or_maintenance_of_apical/basal_cell_polarity	30	2.65374	1.55531	7	0.0139561	0.079685
mir11	positive_regulation_of_transcription,_DNA-dependent	67	5.92669	2.32431	12	0.0138474	0.079707
mir11	sensory_perception_of_light_stimulus	60	5.30748	2.19954	11	0.0152432	0.0856525
mir11	chemical_homeostasis	60	5.30748	2.19954	11	0.0152432	0.0856525
mir11	visual_perception	60	5.30748	2.19954	11	0.0152432	0.0856525
mir11	defense_response_to_bacterium	68	6.01514	2.34159	12	0.0154966	0.0863903
mir11	positive_regulation_of_RNA_metabolic_process	68	6.01514	2.34159	12	0.0154966	0.0863903
mir11	carboxylic_acid_transport	45	3.98061	1.90486	9	0.0156711	0.0866806
mir11	phototransduction	45	3.98061	1.90486	9	0.0156711	0.0866806
mir11	olfactory_learning	45	3.98061	1.90486	9	0.0156711	0.0866806
mir11	organic_acid_transport	45	3.98061	1.90486	9	0.0156711	0.0866806
mir11	epidermal_growth_factor_receptor_signaling_pathway	45	3.98061	1.90486	9	0.0156711	0.0866806
mir11	phosphoinositide-mediated_signaling	24	2.12299	1.39111	6	0.0159643	0.0876183
mir11	di-,_tri-valent_inorganic_cation_homeostasis	24	2.12299	1.39111	6	0.0159643	0.0876183
mir11	meiotic_recombination	24	2.12299	1.39111	6	0.0159643	0.0876183
mir11	mesoderm_development	93	8.22659	2.73841	15	0.0164272	0.0894651
mir11	defense_response_to_Gram-negative_bacterium	31	2.7422	1.58102	7	0.0166815	0.0894734
mir11	regulation_of_organelle_organization_and_biogenesis	53	4.68827	2.06726	10	0.0166532	0.0900033
mir11	Toll_signaling_pathway	39	3.44986	1.77333	8	0.0191163	0.101762
mir11	neuroblast_fate_determination	25	2.21145	1.4198	6	0.0194687	0.102865
mir11	cyclic_nucleotide_biosynthetic_process	25	2.21145	1.4198	6	0.0194687	0.102865
mir11	regulation_of_organ_growth	32	2.83066	1.60632	7	0.019762	0.103641
mir11	regulation_of_transport	47	4.15753	1.94673	9	0.020556	0.107012
mir11	establishment_of_planar_polarity	63	5.57285	2.25386	11	0.0214881	0.111048
mir11	establishment_of_tissue_polarity	63	5.57285	2.25386	11	0.0214881	0.111048
mir11	second-messenger-mediated_signaling	40	3.53832	1.79592	8	0.022093	0.113347
mir11	tissue_morphogenesis	72	6.36898	2.40948	12	0.0236067	0.118536
mir11	epithelial_cell_migration,_open_tracheal_system	26	2.29991	1.44792	6	0.0234617	0.118649
mir11	epithelial_cell_migration	26	2.29991	1.44792	6	0.0234617	0.118649
mir11	compound_eye_photoreceptor_fate_commitment	48	4.24598	1.96733	9	0.023371	0.119041
mir11	eye_photoreceptor_cell_fate_commitment	48	4.24598	1.96733	9	0.023371	0.119041
mir11	meiotic_chromosome_segregation	48	4.24598	1.96733	9	0.023371	0.119041
mir11	synaptic_vesicle_transport	89	7.87276	2.67887	14	0.0243754	0.121534
mir11	potassium_ion_transport	41	3.62678	1.81823	8	0.0253819	0.125667
mir11	learning_and/or_memory	73	6.45743	2.42615	12	0.0260477	0.128068
mir11	regulation_of_protein_kinase_activity	49	4.33444	1.98772	9	0.0264503	0.12915
mir11	regulation_of_kinase_activity	49	4.33444	1.98772	9	0.0264503	0.12915
mir11	learning	49	4.33444	1.98772	9	0.0264503	0.12915
mir11	regulation_of_transferase_activity	49	4.33444	1.98772	9	0.0264503	0.12915
mir11	male_gamete_generation	116	10.2611	3.05834	17	0.0267537	0.129737
mir11	spermatogenesis	116	10.2611	3.05834	17	0.0267537	0.129737
mir11	axon_choice_point_recognition	20	1.76916	1.26991	5	0.0271717	0.130868
mir11	regulation_of_transcription_factor_import_into_nucleus	20	1.76916	1.26991	5	0.0271717	0.130868
mir11	transcription_factor_import_into_nucleus	20	1.76916	1.26991	5	0.0271717	0.130868
mir11	neuroblast_fate_commitment	27	2.38837	1.4755	6	0.027968	0.133793
mir11	gastrulation	66	5.83823	2.3069	11	0.02943	0.139842
mir11	protein_import_into_nucleus	58	5.13056	2.16257	10	0.0298656	0.140032
mir11	photoreceptor_cell_fate_commitment	50	4.4229	2.0079	9	0.0298048	0.140679
mir11	leg_disc_development	50	4.4229	2.0079	9	0.0298048	0.140679
mir11	amino_acid_transport	35	3.09603	1.67993	7	0.0313302	0.145933
mir11	wing_disc_pattern_formation	67	5.92669	2.32431	11	0.0324909	0.15035
mir11	nuclear_import	59	5.21902	2.18114	10	0.0332055	0.150702
mir11	circadian_rhythm	59	5.21902	2.18114	10	0.0332055	0.150702
mir11	germarium-derived_egg_chamber_formation	59	5.21902	2.18114	10	0.0332055	0.150702
mir11	bristle_development	51	4.51136	2.02788	9	0.0334451	0.150822
mir11	terminal_region_determination	21	1.85762	1.30127	5	0.0331339	0.151347
mir11	imaginal_disc-derived_wing_vein_specification	28	2.47682	1.50257	6	0.0330094	0.151757
mir11	dorsal_appendage_formation	28	2.47682	1.50257	6	0.0330094	0.151757
mir11	oocyte_development	102	9.02271	2.86785	15	0.0348993	0.156384
mir11	synaptic_vesicle_endocytosis	36	3.18449	1.70376	7	0.0360188	0.159383
mir11	regulation_of_multicellular_organismal_process	85	7.51893	2.61798	13	0.0359208	0.159949
mir11	sodium_ion_transport	60	5.30748	2.19954	10	0.0367979	0.161819
mir11	rhythmic_process	60	5.30748	2.19954	10	0.0367979	0.161819
mir11	meiosis_I	44	3.89215	1.88358	8	0.0372573	0.162828
mir11	regulation_of_protein_modification_process	29	2.56528	1.52917	6	0.0386037	0.167678
mir11	regulation_of_protein_import_into_nucleus	29	2.56528	1.52917	6	0.0386037	0.167678
mir11	imaginal_disc-derived_wing_vein_morphogenesis	29	2.56528	1.52917	6	0.0386037	0.167678
mir11	regulation_of_cell_shape	95	8.40351	2.7677	14	0.0399324	0.171346
mir11	establishment_and/or_maintenance_of_epithelial_cell_apical/basal_polarity	22	1.94608	1.33189	5	0.0398475	0.172025
mir11	oocyte_differentiation	113	9.99575	3.01853	16	0.0407911	0.173977
mir11	neuroblast_proliferation	37	3.27295	1.72726	7	0.0411474	0.174445
mir11	methylation	53	4.68827	2.06726	9	0.0416203	0.1754
mir11	establishment_of_ommatidial_polarity	45	3.98061	1.90486	8	0.0419246	0.175637
mir11	organ_growth	45	3.98061	1.90486	8	0.0419246	0.175637
mir11	regulation_of_intracellular_protein_transport	30	2.65374	1.55531	6	0.0447656	0.186436
mir11	regulation_of_protein_transport	30	2.65374	1.55531	6	0.0447656	0.186436
mir11	dorsal/ventral_pattern_formation,_imaginal_disc	54	4.77673	2.08667	9	0.0461721	0.191169
mir11	membrane_lipid_biosynthetic_process	46	4.06907	1.92591	8	0.0469628	0.192195
mir11	instar_larval_development	46	4.06907	1.92591	8	0.0469628	0.192195
mir11	morphogenesis_of_a_branching_structure	38	3.3614	1.75045	7	0.0467272	0.192342
mir11	periodic_partitioning	38	3.3614	1.75045	7	0.0467272	0.192342
mir11	regulation_of_cytoskeleton_organization_and_biogenesis	38	3.3614	1.75045	7	0.0467272	0.192342
mir11	regulation_of_G-protein_coupled_receptor_protein_signaling_pathway	23	2.03453	1.36182	5	0.0473271	0.192572
mir11	positive_regulation_of_transport	23	2.03453	1.36182	5	0.0473271	0.192572
mir11	protein_amino_acid_alkylation	23	2.03453	1.36182	5	0.0473271	0.192572
mir11	protein_amino_acid_methylation	23	2.03453	1.36182	5	0.0473271	0.192572
mir11	synapse_organization_and_biogenesis	63	5.57285	2.25386	10	0.0491629	0.198899
mir11	MAPKKK_cascade	63	5.57285	2.25386	10	0.0491629	0.198899
mir11	oocyte_construction	98	8.66888	2.81106	14	0.0499106	0.200777
mir11	establishment_of_RNA_localization	55	4.86519	2.1059	9	0.0510428	0.204171
mir11	regulation_of_intracellular_transport	31	2.7422	1.58102	6	0.0515058	0.204866
mir11	cofactor_catabolic_process	31	2.7422	1.58102	6	0.0515058	0.204866
mir11	regulation_of_nucleocytoplasmic_transport	31	2.7422	1.58102	6	0.0515058	0.204866
mir11	biopolymer_glycosylation	47	4.15753	1.94673	8	0.0523796	0.207177
mir11	protein_amino_acid_glycosylation	47	4.15753	1.94673	8	0.0523796	0.207177
mir11	stress-activated_protein_kinase_signaling_pathway	47	4.15753	1.94673	8	0.0523796	0.207177
mir11	DNA_recombination	39	3.44986	1.77333	7	0.0527671	0.207551
mir11	tube_development	108	9.55346	2.951	15	0.0535754	0.209566
mir11	regulation_of_actin_filament-based_process	24	2.12299	1.39111	5	0.0555805	0.216214
mir11	lipid_modification	24	2.12299	1.39111	5	0.0555805	0.216214
mir11	regulation_of_actin_cytoskeleton_organization_and_biogenesis	24	2.12299	1.39111	5	0.0555805	0.216214
mir11	pigment_metabolic_process	56	4.95365	2.12496	9	0.0562383	0.217578
mir11	RNA_localization	109	9.64192	2.96463	15	0.0572514	0.220294
mir11	energy_derivation_by_oxidation_of_organic_compounds	40	3.53832	1.79592	7	0.0592738	0.226842
mir11	sex_determination	25	2.21145	1.4198	5	0.0646084	0.242025
mir11	regulation_of_pole_plasm_oskar_mRNA_localization	25	2.21145	1.4198	5	0.0646084	0.242025
mir11	regulation_of_multicellular_organism_growth	25	2.21145	1.4198	5	0.0646084	0.242025
mir11	glycoprotein_biosynthetic_process	49	4.33444	1.98772	8	0.0643727	0.242425
mir11	regulation_of_catalytic_activity	120	10.615	3.11062	16	0.0642756	0.243354
mir11	protein_import	66	5.83823	2.3069	10	0.0640325	0.243737
mir11	epidermis_morphogenesis	41	3.62678	1.81823	7	0.0662515	0.245582
mir11	phospholipid_biosynthetic_process	41	3.62678	1.81823	7	0.0662515	0.245582
mir11	Golgi_vesicle_transport	41	3.62678	1.81823	7	0.0662515	0.245582
mir11	biopolymer_methylation	41	3.62678	1.81823	7	0.0662515	0.245582
mir11	extracellular_structure_organization_and_biogenesis	84	7.43047	2.60253	12	0.0659534	0.245763
mir11	taxis	33	2.91911	1.63122	6	0.0667454	0.246124
mir11	spindle_assembly	33	2.91911	1.63122	6	0.0667454	0.246124
mir11	nucleobase,_nucleoside,_nucleotide_and_nucleic_acid_transport	58	5.13056	2.16257	9	0.0676224	0.248066
mir11	larval_development	67	5.92669	2.32431	10	0.0695661	0.253881
mir11	glycoprotein_metabolic_process	50	4.4229	2.0079	8	0.0709571	0.257629
mir11	regulation_of_translation	59	5.21902	2.18114	9	0.0738174	0.266647
mir11	regulation_of_RNA_splicing	59	5.21902	2.18114	9	0.0738174	0.266647
mir11	regulation_of_nuclear_mRNA_splicing,_via_spliceosome	59	5.21902	2.18114	9	0.0738174	0.266647
mir11	neurotransmitter_secretion	104	9.19963	2.89583	14	0.0747531	0.267299
mir11	multicellular_organism_growth	26	2.29991	1.44792	5	0.0744053	0.267406
mir11	dsRNA_transport	26	2.29991	1.44792	5	0.0744053	0.267406
mir11	lymph_gland_development	26	2.29991	1.44792	5	0.0744053	0.267406
mir11	oocyte_axis_determination	95	8.40351	2.7677	13	0.0755827	0.267563
mir11	anion_transport	34	3.00757	1.65576	6	0.0752477	0.267715
mir11	oocyte_dorsal/ventral_axis_determination	34	3.00757	1.65576	6	0.0752477	0.267715
mir11	epidermis_development	51	4.51136	2.02788	8	0.077936	0.274521
mir11	regulation_of_alternative_nuclear_mRNA_splicing,_via_spliceosome	51	4.51136	2.02788	8	0.077936	0.274521
mir11	regulation_of_mRNA_processing	60	5.30748	2.19954	9	0.0803503	0.281624
mir11	cellular_ion_homeostasis	43	3.80369	1.86205	7	0.0816262	0.284686
mir11	synaptogenesis	43	3.80369	1.86205	7	0.0816262	0.284686
mir11	alternative_nuclear_mRNA_splicing,_via_spliceosome	52	4.59982	2.04766	8	0.0853097	0.291784
mir11	regulation_of_cell_size	52	4.59982	2.04766	8	0.0853097	0.291784
mir11	morphogenesis_of_follicular_epithelium	27	2.38837	1.4755	5	0.0849592	0.291996
mir11	segment_polarity_determination	27	2.38837	1.4755	5	0.0849592	0.291996
mir11	genital_disc_development	27	2.38837	1.4755	5	0.0849592	0.291996
mir11	nucleus_localization	27	2.38837	1.4755	5	0.0849592	0.291996
mir11	glycerophospholipid_biosynthetic_process	27	2.38837	1.4755	5	0.0849592	0.291996
mir11	generation_of_a_signal_involved_in_cell-cell_signaling	106	9.37655	2.92355	14	0.0845535	0.292019
mir11	branching_morphogenesis_of_a_tube	35	3.09603	1.67993	6	0.0843341	0.292689
mir11	organelle_localization	79	6.98818	2.52389	11	0.0878092	0.298889
mir11	peptidyl-amino_acid_modification	44	3.89215	1.88358	7	0.0900203	0.303497
mir11	bristle_morphogenesis	44	3.89215	1.88358	7	0.0900203	0.303497
mir11	lipid_biosynthetic_process	107	9.465	2.9373	14	0.0897452	0.304017
mir11	rhodopsin_mediated_signaling_pathway	20	1.76916	1.26991	4	0.0945732	0.317336
mir11	sulfur_compound_biosynthetic_process	20	1.76916	1.26991	4	0.0945732	0.317336
mir11	protein_depolymerization	20	1.76916	1.26991	4	0.0945732	0.317336
mir11	germ-line_cyst_formation	20	1.76916	1.26991	4	0.0945732	0.317336
mir11	chromatin_modification	108	9.55346	2.951	14	0.0951322	0.317706
mir11	amino_acid_biosynthetic_process	28	2.47682	1.50257	5	0.0962526	0.319938
mir11	establishment_and/or_maintenance_of_cytoskeleton_polarity	28	2.47682	1.50257	5	0.0962526	0.319938
mir11	establishment_and/or_maintenance_of_microtubule_cytoskeleton_polarity	28	2.47682	1.50257	5	0.0962526	0.319938
mir11	oocyte_microtubule_cytoskeleton_organization	28	2.47682	1.50257	5	0.0962526	0.319938
mir11	regulation_of_neurotransmitter_levels	118	10.438	3.08459	15	0.0981515	0.324725
mir11	nitrogen_compound_biosynthetic_process	45	3.98061	1.90486	7	0.09888	0.325614
mir11	JNK_cascade	45	3.98061	1.90486	7	0.09888	0.325614
mir11	RNA_transport	54	4.77673	2.08667	8	0.101234	0.331823
mir11	nucleic_acid_transport	54	4.77673	2.08667	8	0.101234	0.331823
mir11	positive_regulation_of_transcription_from_RNA_polymerase_II_promoter	37	3.27295	1.72726	6	0.104226	0.340056
mir11	vesicle_docking	29	2.56528	1.52917	5	0.108263	0.35
mir11	protein_polymerization	29	2.56528	1.52917	5	0.108263	0.35
mir11	membrane_docking	29	2.56528	1.52917	5	0.108263	0.35
mir11	vesicle_docking_during_exocytosis	29	2.56528	1.52917	5	0.108263	0.35
mir11	acetyl-CoA_catabolic_process	29	2.56528	1.52917	5	0.108263	0.35
mir11	tricarboxylic_acid_cycle	29	2.56528	1.52917	5	0.108263	0.35
mir11	proximal/distal_pattern_formation,_imaginal_disc	21	1.85762	1.30127	4	0.109029	0.350877
mir11	maintenance_of_location	46	4.06907	1.92591	7	0.108198	0.351397
mir11	asymmetric_cell_division	55	4.86519	2.1059	8	0.109777	0.351685
mir11	nuclear_transport	92	8.13813	2.72365	12	0.112004	0.357201
mir11	nucleocytoplasmic_transport	92	8.13813	2.72365	12	0.112004	0.357201
mir11	tRNA_metabolic_process	92	8.13813	2.72365	12	0.112004	0.357201
mir11	negative_regulation_of_cellular_protein_metabolic_process	65	5.74977	2.28936	9	0.118059	0.373149
mir11	tube_morphogenesis	93	8.22659	2.73841	12	0.118814	0.373867
mir11	cell_growth	47	4.15753	1.94673	7	0.117967	0.374531
mir11	imaginal_disc-derived_leg_morphogenesis	30	2.65374	1.55531	5	0.120962	0.378944
mir11	positive_regulation_of_growth	30	2.65374	1.55531	5	0.120962	0.378944
mir11	aerobic_respiration	30	2.65374	1.55531	5	0.120962	0.378944
mir11	coenzyme_catabolic_process	30	2.65374	1.55531	5	0.120962	0.378944
mir11	rhabdomere_development	22	1.94608	1.33189	4	0.124403	0.388006
mir11	response_to_toxin	22	1.94608	1.33189	4	0.124403	0.388006
mir11	response_to_wounding	22	1.94608	1.33189	4	0.124403	0.388006
mir11	negative_regulation_of_protein_metabolic_process	66	5.83823	2.3069	9	0.126589	0.393092
mir11	cell-cell_adhesion	66	5.83823	2.3069	9	0.126589	0.393092
mir11	wing_disc_dorsal/ventral_pattern_formation	48	4.24598	1.96733	7	0.128174	0.396276
mir11	cytoskeleton-dependent_intracellular_transport	104	9.19963	2.89583	13	0.129053	0.397259
mir11	stem_cell_differentiation	31	2.7422	1.58102	5	0.134319	0.41168
mir11	stem_cell_maintenance	31	2.7422	1.58102	5	0.134319	0.41168
mir11	cellular_respiration	31	2.7422	1.58102	5	0.134319	0.41168
mir11	stem_cell_development	31	2.7422	1.58102	5	0.134319	0.41168
mir11	germarium-derived_oocyte_fate_determination	23	2.03453	1.36182	4	0.14063	0.429163
mir11	cardiac_cell_differentiation	23	2.03453	1.36182	4	0.14063	0.429163
mir11	cuticle_pattern_formation	23	2.03453	1.36182	4	0.14063	0.429163
mir11	proximal/distal_pattern_formation	23	2.03453	1.36182	4	0.14063	0.429163
mir11	acetyl-CoA_metabolic_process	32	2.83066	1.60632	5	0.148299	0.448698
mir11	gastrulation_with_mouth_forming_first	32	2.83066	1.60632	5	0.148299	0.448698
mir11	leg_disc_morphogenesis	32	2.83066	1.60632	5	0.148299	0.448698
mir11	gastrulation_involving_germ_band_extension	32	2.83066	1.60632	5	0.148299	0.448698
mir11	sulfur_metabolic_process	32	2.83066	1.60632	5	0.148299	0.448698
mir11	imaginal_disc-derived_limb_morphogenesis	32	2.83066	1.60632	5	0.148299	0.448698
mir11	ventral_cord_development	32	2.83066	1.60632	5	0.148299	0.448698
mir11	dorsal/ventral_axis_specification	59	5.21902	2.18114	8	0.14767	0.448714
mir11	negative_regulation_of_cellular_component_organization_and_biogenesis	41	3.62678	1.81823	6	0.150482	0.449542
mir11	histone_modification	50	4.4229	2.0079	7	0.149853	0.449559
mir11	pole_plasm_assembly	50	4.4229	2.0079	7	0.149853	0.449559
mir11	covalent_chromatin_modification	50	4.4229	2.0079	7	0.149853	0.449559
mir11	cellular_chemical_homeostasis	50	4.4229	2.0079	7	0.149853	0.449559
mir11	negative_regulation_of_programmed_cell_death	50	4.4229	2.0079	7	0.149853	0.449559
mir11	hexose_metabolic_process	78	6.89972	2.50787	10	0.149718	0.451065
mir11	one-carbon_compound_metabolic_process	69	6.1036	2.35875	9	0.154059	0.458293
mir11	posttranscriptional_regulation_of_gene_expression	108	9.55346	2.951	13	0.15824	0.464872
mir11	pigmentation	60	5.30748	2.19954	8	0.158027	0.466179
mir11	oocyte_fate_determination	24	2.12299	1.39111	4	0.15764	0.466983
mir11	phosphoinositide_biosynthetic_process	24	2.12299	1.39111	4	0.15764	0.466983
mir11	germarium-derived_oocyte_differentiation	24	2.12299	1.39111	4	0.15764	0.466983
mir11	regulation_of_cell_growth	24	2.12299	1.39111	4	0.15764	0.466983
mir11	germ-line_stem_cell_maintenance	24	2.12299	1.39111	4	0.15764	0.466983
mir11	glutamine_family_amino_acid_metabolic_process	24	2.12299	1.39111	4	0.15764	0.466983
mir11	response_to_nutrient_levels	24	2.12299	1.39111	4	0.15764	0.466983
mir11	response_to_extracellular_stimulus	24	2.12299	1.39111	4	0.15764	0.466983
mir11	anatomical_structure_homeostasis	70	6.19206	2.37578	9	0.163815	0.479262
mir11	monosaccharide_metabolic_process	80	7.07664	2.53981	10	0.16792	0.489249
mir11	synaptic_vesicle_exocytosis	52	4.59982	2.04766	7	0.173114	0.502315
mir11	negative_regulation_of_growth	25	2.21145	1.4198	4	0.17536	0.506754
mir11	actin_polymerization_and/or_depolymerization	25	2.21145	1.4198	4	0.17536	0.506754
mir11	synaptic_growth_at_neuromuscular_junction	25	2.21145	1.4198	4	0.17536	0.506754
mir11	pole_plasm_mRNA_localization	43	3.80369	1.86205	6	0.17652	0.508033
mir11	cellular_protein_complex_assembly	81	7.1651	2.55564	10	0.1774	0.5085
mir11	secondary_metabolic_process	81	7.1651	2.55564	10	0.1774	0.5085
mir11	regulation_of_gene_expression,_epigenetic	101	8.93426	2.85376	12	0.181308	0.517604
mir11	microtubule-based_movement	101	8.93426	2.85376	12	0.181308	0.517604
mir11	cytokinesis	72	6.36898	2.40948	9	0.184172	0.523668
mir11	monocarboxylic_acid_metabolic_process	82	7.25355	2.57137	10	0.187122	0.52993
mir11	amine_biosynthetic_process	44	3.89215	1.88358	6	0.190178	0.534309
mir11	pole_plasm_RNA_localization	44	3.89215	1.88358	6	0.190178	0.534309
mir11	response_to_DNA_damage_stimulus	102	9.02271	2.86785	12	0.190057	0.536097
mir11	mesoderm_formation	26	2.29991	1.44792	4	0.193715	0.539962
mir11	negative_regulation_of_translation	35	3.09603	1.67993	5	0.193573	0.541698
mir11	cell-cell_junction_assembly_and_maintenance	35	3.09603	1.67993	5	0.193573	0.541698
mir11	protein_processing	35	3.09603	1.67993	5	0.193573	0.541698
mir11	cell_junction_assembly_and_maintenance	35	3.09603	1.67993	5	0.193573	0.541698
mir11	Ras_protein_signal_transduction	94	8.31505	2.75309	11	0.208019	0.57756
mir11	imaginal_disc-derived_wing_hair_organization_and_biogenesis	36	3.18449	1.70376	5	0.209634	0.579768
mir11	membrane_fusion	36	3.18449	1.70376	5	0.209634	0.579768
mir11	negative_regulation_of_cellular_biosynthetic_process	36	3.18449	1.70376	5	0.209634	0.579768
mir11	eggshell_chorion_formation	55	4.86519	2.1059	7	0.210652	0.580317
mir11	eye_pigment_biosynthetic_process	27	2.38837	1.4755	4	0.212629	0.583494
mir11	mesoderm_morphogenesis	27	2.38837	1.4755	4	0.212629	0.583494
mir11	oocyte_anterior/posterior_axis_determination	65	5.74977	2.28936	8	0.214493	0.586337
mir11	transcription_initiation	75	6.63435	2.45916	9	0.216646	0.589943
mir11	interphase	37	3.27295	1.72726	5	0.226103	0.613338
mir11	eye_pigmentation	37	3.27295	1.72726	5	0.226103	0.613338
mir11	interphase_of_mitotic_cell_cycle	37	3.27295	1.72726	5	0.226103	0.613338
mir11	non-sensory_hair_organization_and_biogenesis	37	3.27295	1.72726	5	0.226103	0.613338
mir11	hair_cell_differentiation	37	3.27295	1.72726	5	0.226103	0.613338
mir11	reproductive_developmental_process	76	6.72281	2.4755	9	0.227939	0.615957
mir11	cellular_protein_complex_disassembly	28	2.47682	1.50257	4	0.232025	0.624616
mir11	eye_pigment_metabolic_process	28	2.47682	1.50257	4	0.232025	0.624616
mir11	protein_complex_disassembly	28	2.47682	1.50257	4	0.232025	0.624616
mir11	formation_of_primary_germ_layer	28	2.47682	1.50257	4	0.232025	0.624616
mir11	organic_acid_biosynthetic_process	28	2.47682	1.50257	4	0.232025	0.624616
mir11	carboxylic_acid_biosynthetic_process	28	2.47682	1.50257	4	0.232025	0.624616
mir11	regulation_of_response_to_stimulus	47	4.15753	1.94673	6	0.233358	0.625824
mir11	cytoplasm_organization_and_biogenesis	57	5.04211	2.14385	7	0.237199	0.633723
mir11	pigmentation_during_development	57	5.04211	2.14385	7	0.237199	0.633723
mir11	mitochondrion_organization_and_biogenesis	77	6.81127	2.49174	9	0.239444	0.634931
mir11	transcription_initiation_from_RNA_polymerase_II_promoter	67	5.92669	2.32431	8	0.238982	0.636086
mir11	neuromuscular_junction_development	38	3.3614	1.75045	5	0.242936	0.641787
mir11	lipid_catabolic_process	38	3.3614	1.75045	5	0.242936	0.641787
mir11	gland_morphogenesis	48	4.24598	1.96733	6	0.248384	0.651319
mir11	salivary_gland_morphogenesis	48	4.24598	1.96733	6	0.248384	0.651319
mir11	regulation_of_hydrolase_activity	58	5.13056	2.16257	7	0.250861	0.652977
mir11	defense_response_to_fungus	29	2.56528	1.52917	4	0.251827	0.653091
mir11	larval_behavior	29	2.56528	1.52917	4	0.251827	0.653091
mir11	macromolecular_complex_disassembly	29	2.56528	1.52917	4	0.251827	0.653091
mir11	vesicle_organization_and_biogenesis	29	2.56528	1.52917	4	0.251827	0.653091
mir11	cell-cell_junction_assembly	29	2.56528	1.52917	4	0.251827	0.653091
mir11	cellular_macromolecular_complex_disassembly	29	2.56528	1.52917	4	0.251827	0.653091
mir11	cell_junction_assembly	29	2.56528	1.52917	4	0.251827	0.653091
mir11	regulation_of_small_GTPase_mediated_signal_transduction	88	7.7843	2.66378	10	0.249986	0.653101
mir11	DNA_replication	98	8.66888	2.81106	11	0.24832	0.653572
mir11	nucleotide-excision_repair	20	1.76916	1.26991	3	0.257999	0.666653
mir11	epidermal_cell_differentiation	39	3.44986	1.77333	5	0.260085	0.669601
mir11	germ_cell_migration	39	3.44986	1.77333	5	0.260085	0.669601
mir11	pole_plasm_oskar_mRNA_localization	39	3.44986	1.77333	5	0.260085	0.669601
mir11	protein-DNA_complex_assembly	120	10.615	3.11062	13	0.263053	0.674787
mir11	tRNA_aminoacylation_for_protein_translation	59	5.21902	2.18114	7	0.264752	0.676696
mir11	tRNA_aminoacylation	59	5.21902	2.18114	7	0.264752	0.676696
mir11	cellular_homeostasis	110	9.73038	2.9782	12	0.266303	0.678212
mir11	imaginal_disc_growth	30	2.65374	1.55531	4	0.271961	0.690136
mir11	response_to_oxidative_stress	50	4.4229	2.0079	6	0.279195	0.703452
mir11	amino_acid_activation	60	5.30748	2.19954	7	0.278848	0.705088
mir11	intracellular_mRNA_localization	60	5.30748	2.19954	7	0.278848	0.705088
mir11	nuclear_migration	21	1.85762	1.30127	3	0.282827	0.710076
mir11	actin_filament_bundle_formation	21	1.85762	1.30127	3	0.282827	0.710076
mir11	muscle_fiber_development	81	7.1651	2.55564	9	0.287303	0.718766
mir11	eggshell_formation	71	6.28052	2.39269	8	0.290466	0.724119
mir11	chorion-containing_eggshell_formation	71	6.28052	2.39269	8	0.290466	0.724119
mir11	cuticle_development	61	5.39594	2.2178	7	0.293125	0.725638
mir11	nuclear_organization_and_biogenesis	31	2.7422	1.58102	4	0.292352	0.726263
mir11	response_to_fungus	31	2.7422	1.58102	4	0.292352	0.726263
mir11	regulation_of_mitosis	41	3.62678	1.81823	5	0.295146	0.728094
mir11	neuroblast_division	22	1.94608	1.33189	3	0.307841	0.756776
mir11	asymmetric_neuroblast_division	22	1.94608	1.33189	3	0.307841	0.756776
mir11	regulation_of_Ras_protein_signal_transduction	73	6.45743	2.42615	8	0.317169	0.777008
mir11	response_to_temperature_stimulus	63	5.57285	2.25386	7	0.322125	0.786428
mir11	gut_morphogenesis	43	3.80369	1.86205	5	0.330919	0.805122
mir11	ectodermal_gut_morphogenesis	43	3.80369	1.86205	5	0.330919	0.805122
mir11	ectodermal_gut_development	43	3.80369	1.86205	5	0.330919	0.805122
mir11	male_meiosis	33	2.91911	1.63122	4	0.33363	0.806178
mir11	tRNA_processing	33	2.91911	1.63122	4	0.33363	0.806178
mir11	axon_extension	23	2.03453	1.36182	3	0.332923	0.807224
mir11	synaptic_vesicle_docking_during_exocytosis	23	2.03453	1.36182	3	0.332923	0.807224
mir11	regulation_of_circadian_rhythm	23	2.03453	1.36182	3	0.332923	0.807224
mir11	reproductive_behavior	64	5.66131	2.27168	7	0.3368	0.81107
mir11	skeletal_muscle_fiber_development	75	6.63435	2.45916	8	0.344312	0.82635
mir11	digestive_tract_morphogenesis	44	3.89215	1.88358	5	0.348963	0.834681
mir11	mating	65	5.74977	2.28936	7	0.351561	0.838065
mir11	establishment_of_nucleus_localization	24	2.12299	1.39111	3	0.357963	0.850463
mir11	regulation_of_mitotic_cell_cycle	88	7.7843	2.66378	9	0.375848	0.884056
mir11	fatty_acid_metabolic_process	56	4.95365	2.12496	6	0.375394	0.885931
mir11	rRNA_metabolic_process	35	3.09603	1.67993	4	0.375135	0.88828
mir11	chromatin_remodeling	67	5.92669	2.32431	7	0.381249	0.893788
mir11	regulation_of_Rho_protein_signal_transduction	25	2.21145	1.4198	3	0.382864	0.894612
mir11	germ-line_stem_cell_division	25	2.21145	1.4198	3	0.382864	0.894612
mir11	cytokinesis_during_cell_cycle	25	2.21145	1.4198	3	0.382864	0.894612
mir11	ATP_biosynthetic_process	89	7.87276	2.67887	9	0.388755	0.905391
mir11	regulation_of_developmental_growth	36	3.18449	1.70376	4	0.395823	0.918828
mir11	actomyosin_structure_organization_and_biogenesis	36	3.18449	1.70376	4	0.395823	0.918828
mir11	ATP_metabolic_process	90	7.96122	2.69388	9	0.401683	0.929383
mir11	response_to_heat	58	5.13056	2.16257	6	0.407898	0.937636
mir11	mitotic_cell_cycle,_embryonic	26	2.29991	1.44792	3	0.407535	0.939853
mir11	polyol_metabolic_process	26	2.29991	1.44792	3	0.407535	0.939853
mir11	stem_cell_division	26	2.29991	1.44792	3	0.407535	0.939853
mir11	RNA_interference	26	2.29991	1.44792	3	0.407535	0.939853
mir11	molting_cycle_process	26	2.29991	1.44792	3	0.407535	0.939853
mir11	establishment_of_organelle_localization	69	6.1036	2.35875	7	0.411008	0.941728
mir11	mating_behavior	59	5.21902	2.18114	6	0.424103	0.968597
mir11	behavioral_interaction_between_organisms	59	5.21902	2.18114	6	0.424103	0.968597
mir11	regulation_of_cell_cycle_process	59	5.21902	2.18114	6	0.424103	0.968597
mir11	fatty_acid_biosynthetic_process	27	2.38837	1.4755	3	0.431898	0.983229
mir11	Rho_protein_signal_transduction	27	2.38837	1.4755	3	0.431898	0.983229
mir11	cellular_lipid_catabolic_process	27	2.38837	1.4755	3	0.431898	0.983229
mir11	ncRNA_processing	71	6.28052	2.39269	7	0.440671	0.99046
mir11	chitin-based_cuticle_development	38	3.3614	1.75045	4	0.436802	0.991204
mir11	purine_ribonucleoside_triphosphate_biosynthetic_process	93	8.22659	2.73841	9	0.440446	0.993107
mir11	purine_nucleoside_triphosphate_biosynthetic_process	93	8.22659	2.73841	9	0.440446	0.993107
mir11	reproductive_behavior_in_a_multicellular_organism	49	4.33444	1.98772	5	0.439136	0.993318
mir11	mRNA_transport	22	1.94608	1.33189	2	0.591385	1
mir11	cell_cycle_checkpoint	23	2.03453	1.36182	2	0.616	1
mir11	negative_regulation_of_gene_expression,_epigenetic	38	3.3614	1.75045	2	0.861176	1
mir11	microtubule_organizing_center_organization_and_biogenesis	53	4.68827	2.06726	4	0.700827	1
mir11	posttranscriptional_gene_silencing	35	3.09603	1.67993	3	0.609005	1
mir11	glial_cell_migration	21	1.85762	1.30127	1	0.857008	1
mir11	biogenic_amine_metabolic_process	31	2.7422	1.58102	2	0.772993	1
mir11	multicellular_organism_reproduction	57	5.04211	2.14385	5	0.575301	1
mir11	electron_transport_chain	74	6.54589	2.44271	2	0.991364	1
mir11	mRNA_catabolic_process	23	2.03453	1.36182	2	0.616	1
mir11	embryonic_organ_development	43	3.80369	1.86205	3	0.745098	1
mir11	regulation_of_tube_size,_open_tracheal_system	21	1.85762	1.30127	0	1	1
mir11	regulation_of_synapse_structure_and_activity	40	3.53832	1.79592	4	0.476942	1
mir11	molting_cycle	48	4.24598	1.96733	3	0.809036	1
mir11	syncytium_formation_by_plasma_membrane_fusion	23	2.03453	1.36182	2	0.616	1
mir11	pole_cell_migration	20	1.76916	1.26991	2	0.538676	1
mir11	hormone_metabolic_process	29	2.56528	1.52917	3	0.479428	1
mir11	amino_sugar_metabolic_process	105	9.28809	2.90972	9	0.589294	1
mir11	embryonic_gut_morphogenesis	25	2.21145	1.4198	2	0.661771	1
mir11	male_courtship_behavior	28	2.47682	1.50257	2	0.722054	1
mir11	lipoprotein_biosynthetic_process	29	2.56528	1.52917	2	0.740026	1
mir11	mitotic_sister_chromatid_segregation	46	4.06907	1.92591	0	1	1
mir11	muscle_attachment	20	1.76916	1.26991	1	0.843132	1
mir11	gene_silencing_by_RNA	35	3.09603	1.67993	3	0.609005	1
mir11	maintenance_of_protein_location	33	2.91911	1.63122	3	0.568262	1
mir11	cellular_polysaccharide_metabolic_process	111	9.81884	2.9917	8	0.77539	1
mir11	steroid_metabolic_process	30	2.65374	1.55531	2	0.756994	1
mir11	cellular_carbohydrate_catabolic_process	62	5.4844	2.2359	2	0.977495	1
mir11	glucose_catabolic_process	41	3.62678	1.81823	1	0.977569	1
mir11	ATP_synthesis_coupled_proton_transport	68	6.01514	2.34159	3	0.946546	1
mir11	chitin_metabolic_process	95	8.40351	2.7677	5	0.930407	1
mir11	transmembrane_transport	83	7.34201	2.587	6	0.753299	1
mir11	molting_cycle,_protein-based_cuticle	48	4.24598	1.96733	3	0.809036	1
mir11	nucleosome_assembly	24	2.12299	1.39111	1	0.891697	1
mir11	cell_projection_biogenesis	71	6.28052	2.39269	4	0.8836	1
mir11	sister_chromatid_segregation	47	4.15753	1.94673	0	1	1
mir11	ATP_synthesis_coupled_electron_transport	68	6.01514	2.34159	1	0.99816	1
mir11	nucleoside_metabolic_process	21	1.85762	1.30127	0	1	1
mir11	myoblast_maturation	37	3.27295	1.72726	3	0.647091	1
mir11	energy_coupled_proton_transport,_down_electrochemical_gradient	68	6.01514	2.34159	3	0.946546	1
mir11	nucleoside_monophosphate_biosynthetic_process	23	2.03453	1.36182	0	1	1
mir11	N-acetylglucosamine_metabolic_process	104	9.19963	2.89583	9	0.577543	1
mir11	skeletal_muscle_development	95	8.40351	2.7677	9	0.466139	1
mir11	translational_elongation	20	1.76916	1.26991	1	0.843132	1
mir11	memory	35	3.09603	1.67993	3	0.609005	1
mir11	ribonucleoside_monophosphate_biosynthetic_process	21	1.85762	1.30127	0	1	1
mir11	gonad_development	29	2.56528	1.52917	1	0.931841	1
mir11	nuclear_export	29	2.56528	1.52917	1	0.931841	1
mir11	regulation_of_synaptogenesis	22	1.94608	1.33189	1	0.869657	1
mir11	nucleoside_monophosphate_metabolic_process	23	2.03453	1.36182	0	1	1
mir11	neuropeptide_signaling_pathway	34	3.00757	1.65576	3	0.588959	1
mir11	embryonic_ectodermal_gut_morphogenesis	25	2.21145	1.4198	2	0.661771	1
mir11	maintenance_of_location_in_cell	30	2.65374	1.55531	3	0.50248	1
mir11	embryonic_organ_morphogenesis	25	2.21145	1.4198	2	0.661771	1
mir11	centrosome_duplication	21	1.85762	1.30127	1	0.857008	1
mir11	chromatin_assembly	66	5.83823	2.3069	4	0.846268	1
mir11	alcohol_catabolic_process	45	3.98061	1.90486	1	0.984514	1
mir11	nucleoside_triphosphate_metabolic_process	96	8.49197	2.78223	9	0.478902	1
mir11	proteolysis_involved_in_cellular_protein_catabolic_process	110	9.73038	2.9782	6	0.931128	1
mir11	maintenance_of_protein_location_in_cell	29	2.56528	1.52917	2	0.740026	1
mir11	chromatin_silencing	38	3.3614	1.75045	2	0.861176	1
mir11	courtship_behavior	42	3.71524	1.84027	4	0.515925	1
mir11	molting_cycle,_chitin-based_cuticle	43	3.80369	1.86205	3	0.745098	1
mir11	nuclear-transcribed_mRNA_catabolic_process	22	1.94608	1.33189	2	0.591385	1
mir11	DNA-dependent_DNA_replication	58	5.13056	2.16257	5	0.591094	1
mir11	embryonic_gut_development	26	2.29991	1.44792	2	0.682957	1
mir11	calcium-dependent_cell-cell_adhesion	21	1.85762	1.30127	1	0.857008	1
mir11	aromatic_compound_metabolic_process	79	6.98818	2.52389	7	0.555395	1
mir11	posttranscriptional_gene_silencing_by_RNA	35	3.09603	1.67993	3	0.609005	1
mir11	coenzyme_biosynthetic_process	38	3.3614	1.75045	2	0.861176	1
mir11	GPI_anchor_metabolic_process	23	2.03453	1.36182	2	0.616	1
mir11	single_fertilization	20	1.76916	1.26991	2	0.538676	1
mir11	ribonucleoside_triphosphate_biosynthetic_process	94	8.31505	2.75309	9	0.453316	1
mir11	ribonucleoside_monophosphate_metabolic_process	21	1.85762	1.30127	0	1	1
mir11	sensory_perception_of_taste	64	5.66131	2.27168	2	0.980783	1
mir11	cofactor_metabolic_process	101	8.93426	2.85376	9	0.541427	1
mir11	monosaccharide_catabolic_process	41	3.62678	1.81823	1	0.977569	1
mir11	hexose_catabolic_process	41	3.62678	1.81823	1	0.977569	1
mir11	centrosome_cycle	41	3.62678	1.81823	3	0.715111	1
mir11	embryonic_digestive_tract_morphogenesis	25	2.21145	1.4198	2	0.661771	1
mir11	nucleoside_triphosphate_biosynthetic_process	94	8.31505	2.75309	9	0.453316	1
mir11	transmembrane_ion_transport	69	6.1036	2.35875	3	0.950038	1
mir11	purine_nucleotide_biosynthetic_process	115	10.1727	3.04513	10	0.570198	1
mir11	fertilization	21	1.85762	1.30127	2	0.565608	1
mir11	amino_acid_derivative_metabolic_process	51	4.51136	2.02788	4	0.671403	1
mir11	reproductive_process_in_a_multicellular_organism	57	5.04211	2.14385	5	0.575301	1
mir11	regulation_of_Rab_protein_signal_transduction	25	2.21145	1.4198	2	0.661771	1
mir11	myoblast_development	37	3.27295	1.72726	3	0.647091	1
mir11	mitochondrial_transport	47	4.15753	1.94673	4	0.60677	1
mir11	circadian_behavior	38	3.3614	1.75045	3	0.665115	1
mir11	embryonic_ectodermal_gut_development	25	2.21145	1.4198	2	0.661771	1
mir11	rhythmic_behavior	41	3.62678	1.81823	3	0.715111	1
mir11	nitrogen_compound_catabolic_process	35	3.09603	1.67993	3	0.609005	1
mir11	response_to_organic_substance	31	2.7422	1.58102	3	0.524994	1
mir11	myoblast_differentiation	38	3.3614	1.75045	3	0.665115	1
mir11	ribonucleotide_metabolic_process	119	10.5265	3.09764	10	0.614341	1
mir11	plasma_membrane_fusion	23	2.03453	1.36182	2	0.616	1
mir11	purine_nucleotide_metabolic_process	117	10.3496	3.07149	10	0.592547	1
mir11	polysaccharide_metabolic_process	111	9.81884	2.9917	8	0.77539	1
mir11	sensory_perception_of_smell	70	6.19206	2.37578	5	0.752518	1
mir11	sex_differentiation	58	5.13056	2.16257	4	0.76589	1
mir11	amino_acid_catabolic_process	32	2.83066	1.60632	2	0.788064	1
mir11	motor_axon_guidance	20	1.76916	1.26991	2	0.538676	1
mir11	locomotor_rhythm	27	2.38837	1.4755	2	0.703042	1
mir11	establishment_of_imaginal_disc-derived_wing_hair_orientation	20	1.76916	1.26991	1	0.843132	1
mir11	purine_ribonucleoside_triphosphate_metabolic_process	94	8.31505	2.75309	9	0.453316	1
mir11	RNA_modification	30	2.65374	1.55531	3	0.50248	1
mir11	carbohydrate_catabolic_process	77	6.81127	2.49174	5	0.821806	1
mir11	DNA_packaging	95	8.40351	2.7677	5	0.930407	1
mir11	ribonucleoprotein_complex_assembly	91	8.04968	2.7088	8	0.560737	1
mir11	ribosome_biogenesis	54	4.77673	2.08667	4	0.714806	1
mir11	spindle_elongation	80	7.07664	2.53981	3	0.976674	1
mir11	development_of_primary_sexual_characteristics	35	3.09603	1.67993	2	0.828095	1
mir11	mitochondrial_electron_transport,_NADH_to_ubiquinone	33	2.91911	1.63122	0	1	1
mir11	regulation_of_JNK_cascade	24	2.12299	1.39111	1	0.891697	1
mir11	glucose_metabolic_process	56	4.95365	2.12496	5	0.559192	1
mir11	homophilic_cell_adhesion	30	2.65374	1.55531	1	0.93787	1
mir11	syncytium_formation	23	2.03453	1.36182	2	0.616	1
mir11	gliogenesis	39	3.44986	1.77333	4	0.456998	1
mir11	regulation_of_Rab_GTPase_activity	25	2.21145	1.4198	2	0.661771	1
mir11	protein_targeting_to_membrane	20	1.76916	1.26991	0	1	1
mir11	purine_ribonucleotide_metabolic_process	114	10.0842	3.03186	10	0.558832	1
mir11	regulation_of_GTPase_activity	37	3.27295	1.72726	2	0.850857	1
mir11	RNA_export_from_nucleus	21	1.85762	1.30127	1	0.857008	1
mir11	Malpighian_tubule_morphogenesis	24	2.12299	1.39111	2	0.639458	1
mir11	purine_nucleoside_triphosphate_metabolic_process	94	8.31505	2.75309	9	0.453316	1
mir11	mitotic_spindle_elongation	79	6.98818	2.52389	3	0.974969	1
mir11	cilium_biogenesis	32	2.83066	1.60632	0	1	1
mir11	hindgut_morphogenesis	39	3.44986	1.77333	3	0.682458	1
mir11	respiratory_electron_transport_chain	71	6.28052	2.39269	1	0.998606	1
mir11	coenzyme_metabolic_process	87	7.69584	2.6486	7	0.658448	1
mir11	proton_transport	75	6.63435	2.45916	4	0.907517	1
mir11	heterocycle_metabolic_process	81	7.1651	2.55564	7	0.582479	1
mir11	ommatidial_rotation	25	2.21145	1.4198	2	0.661771	1
mir11	protein_folding	96	8.49197	2.78223	7	0.755284	1
mir11	regulation_of_Ras_GTPase_activity	33	2.91911	1.63122	2	0.802245	1
mir11	protein_amino_acid_lipidation	29	2.56528	1.52917	2	0.740026	1
mir11	centrosome_organization_and_biogenesis	50	4.4229	2.0079	4	0.655961	1
mir11	anti-apoptosis	24	2.12299	1.39111	2	0.639458	1
mir11	DNA_repair	88	7.7843	2.66378	7	0.670261	1
mir11	myotube_differentiation	23	2.03453	1.36182	2	0.616	1
mir11	protein_targeting_to_mitochondrion	28	2.47682	1.50257	2	0.722054	1
mir11	cofactor_biosynthetic_process	45	3.98061	1.90486	2	0.916886	1
mir11	regulation_of_synapse_organization_and_biogenesis	28	2.47682	1.50257	2	0.722054	1
mir11	glycolysis	33	2.91911	1.63122	0	1	1
mir11	amine_catabolic_process	35	3.09603	1.67993	3	0.609005	1
mir11	regulation_of_MAPKKK_cascade	26	2.29991	1.44792	1	0.91001	1
mir11	karyosome_formation	21	1.85762	1.30127	2	0.565608	1
mir11	gene_silencing	76	6.72281	2.4755	6	0.673531	1
mir11	pigment_biosynthetic_process	45	3.98061	1.90486	4	0.571683	1
mir11	regulation_of_tube_size	24	2.12299	1.39111	0	1	1
mir11	hydrogen_transport	75	6.63435	2.45916	4	0.907517	1
mir11	striated_muscle_development	102	9.02271	2.86785	9	0.553601	1
mir11	organelle_ATP_synthesis_coupled_electron_transport	64	5.66131	2.27168	1	0.997335	1
mir11	regulation_of_behavior	30	2.65374	1.55531	3	0.50248	1
mir11	modification-dependent_protein_catabolic_process	109	9.64192	2.96463	6	0.927458	1
mir11	regulation_of_tube_architecture,_open_tracheal_system	40	3.53832	1.79592	4	0.476942	1
mir11	Rab_protein_signal_transduction	25	2.21145	1.4198	2	0.661771	1
mir11	chromosome_condensation	33	2.91911	1.63122	1	0.952942	1
mir11	modification-dependent_macromolecule_catabolic_process	110	9.73038	2.9782	6	0.931128	1
mir11	heterochromatin_formation	42	3.71524	1.84027	2	0.896218	1
mir11	ribonucleoside_triphosphate_metabolic_process	95	8.40351	2.7677	9	0.466139	1
mir11	defense_response_to_Gram-positive_bacterium	26	2.29991	1.44792	2	0.682957	1
mir11	male_mating_behavior	28	2.47682	1.50257	2	0.722054	1
mir11	chromosome_segregation	109	9.64192	2.96463	9	0.634675	1
mir11	regulation_of_synaptic_growth_at_neuromuscular_junction	21	1.85762	1.30127	1	0.857008	1
mir11	negative_regulation_of_apoptosis	44	3.89215	1.88358	4	0.553493	1
mir11	cell_redox_homeostasis	55	4.86519	2.1059	5	0.542781	1
mir11	developmental_maturation	52	4.59982	2.04766	4	0.686359	1
mir11	muscle_cell_differentiation	45	3.98061	1.90486	4	0.571683	1
mir11	cell_maturation	44	3.89215	1.88358	4	0.553493	1
mir11	purine_ribonucleotide_biosynthetic_process	113	9.99575	3.01853	10	0.547347	1
mir11	ribonucleotide_biosynthetic_process	118	10.438	3.08459	10	0.603516	1
mir11	embryonic_hindgut_morphogenesis	25	2.21145	1.4198	2	0.661771	1
mir11	detection_of_chemical_stimulus	21	1.85762	1.30127	1	0.857008	1
mir11	vitamin_metabolic_process	22	1.94608	1.33189	0	1	1
mir11	apical_junction_assembly	28	2.47682	1.50257	3	0.455883	1
mir11	lipoprotein_metabolic_process	30	2.65374	1.55531	2	0.756994	1
mir11	glucosamine_metabolic_process	104	9.19963	2.89583	9	0.577543	1
mir11	rRNA_processing	34	3.00757	1.65576	3	0.588959	1
mir11	RNA_catabolic_process	25	2.21145	1.4198	2	0.661771	1
mir11	ubiquitin-dependent_protein_catabolic_process	107	9.465	2.9373	6	0.919596	1
mir11	regulation_of_protein_kinase_cascade	36	3.18449	1.70376	3	0.628385	1
mir11	myoblast_fusion	23	2.03453	1.36182	2	0.616	1
mir11	long-term_memory	22	1.94608	1.33189	2	0.591385	1
mir11	cellular_protein_catabolic_process	110	9.73038	2.9782	6	0.931128	1
mir11	GPI_anchor_biosynthetic_process	21	1.85762	1.30127	2	0.565608	1
mir11	reproductive_structure_development	29	2.56528	1.52917	1	0.931841	1
mir11	translational_initiation	67	5.92669	2.32431	4	0.854459	1
mir11	regulation_of_Notch_signaling_pathway	24	2.12299	1.39111	11	2.167060653240537E-6	1.5342789424943002E-4
mir11	induction_of_programmed_cell_death	33	2.91911	1.63122	13	2.113506158760026E-6	1.6626248448912203E-4
mir11	response_to_radiation	97	8.58042	2.79668	24	2.9306950788991584E-6	1.8863019235096403E-4
mir11	cell_fate_specification	73	6.45743	2.42615	20	3.5933040028753025E-6	2.1200493616964288E-4
mir11	Notch_signaling_pathway	57	5.04211	2.14385	21	6.8606550057171194E-9	2.4286718720238602E-6
mir11	regulation_of_cell_differentiation	85	7.51893	2.61798	24	2.162139877520986E-7	3.061590066569716E-5
mir11	negative_regulation_of_signal_transduction	95	8.40351	2.7677	23	6.90764964834785E-6	3.260410634020185E-4
mir11	transforming_growth_factor_beta_receptor_signaling_pathway	36	3.18449	1.70376	13	6.607870788037221E-6	3.3416946556645376E-4
mir11	antimicrobial_humoral_response	88	7.7843	2.66378	22	6.216447041522941E-6	3.385572696460187E-4
mir11	positive_regulation_of_programmed_cell_death	42	3.71524	1.84027	14	8.631542353324351E-6	3.819457491346025E-4
mir11	segment_specification	30	2.65374	1.55531	15	6.749657791971367E-9	4.778757716715728E-6
mir11	cell_fate_determination	117	10.3496	3.07149	31	2.080756596011373E-8	4.91058556658684E-6
mir11	brain_development	94	8.31505	2.75309	25	4.2882077499011227E-7	5.060085144883325E-5
mir11	transmembrane_receptor_protein_serine/threonine_kinase_signaling_pathway	38	3.3614	1.75045	13	1.3073532354261488E-5	5.444741709892431E-4
mir11	blastoderm_segmentation	119	10.5265	3.09764	31	3.1963997916982E-8	5.657627631305814E-6
mir11	formation_of_anatomical_boundary	50	4.4229	2.0079	17	6.982389106908064E-7	6.179414359613636E-5
mir11	regulation_of_programmed_cell_death	102	9.02271	2.86785	26	6.249809793699611E-7	6.321236191341892E-5
mir11	humoral_immune_response	95	8.40351	2.7677	22	2.2937431509612175E-5	9.022056393780789E-4
mir998	peripheral_nervous_system_development	80	3.62942	1.86139	14	1.3861695692434141E-5	0.00163568
mir998	R7_cell_differentiation	33	1.49714	1.1955	9	1.1607225360988354E-5	0.00164358
mir998	cell_maturation	44	1.99618	1.38044	10	2.2092273737987106E-5	0.00223448
mir998	locomotion	29	1.31567	1.1207	8	3.260965594983094E-5	0.00288595
mir998	ovarian_follicle_cell_migration	60	2.72207	1.61201	11	7.287554256678905E-5	0.00515959
mir998	maintenance_of_protein_location	33	1.49714	1.1955	8	8.966273766034497E-5	0.0052901
mir998	developmental_maturation	52	2.35913	1.5007	10	1.0108544285138887E-4	0.00550527
mir998	leg_disc_development	50	2.26839	1.47156	10	7.130494910774167E-5	0.00560932
mir998	regulation_of_growth	94	4.26457	2.0177	14	8.83421561341338E-5	0.00568602
mir998	regulation_of_cell_differentiation	85	3.85626	1.91867	13	1.182699766925075E-4	0.00598108
mir998	border_follicle_cell_migration	54	2.44986	1.52929	10	1.4076671035139122E-4	0.00664419
mir998	maintenance_of_location	46	2.08692	1.41147	9	1.9436784556641214E-4	0.00860078
mir998	myoblast_maturation	37	1.67861	1.26588	8	2.1201695987272895E-4	0.00882988
mir998	myoblast_development	37	1.67861	1.26588	8	2.1201695987272895E-4	0.00882988
mir998	myoblast_differentiation	38	1.72398	1.28287	8	2.579061865302746E-4	0.0101443
mir998	tube_morphogenesis	93	4.21921	2.00694	13	2.966392288368156E-4	0.0110537
mir998	imaginal_disc-derived_leg_morphogenesis	30	1.36103	1.13986	7	3.1951677949069865E-4	0.0113109
mir998	maintenance_of_location_in_cell	30	1.36103	1.13986	7	3.1951677949069865E-4	0.0113109
mir998	segment_specification	30	1.36103	1.13986	7	3.1951677949069865E-4	0.0113109
mir998	blastoderm_segmentation	119	5.39877	2.27021	15	3.35993443883111E-4	0.0113278
mir998	tube_development	108	4.89972	2.16274	14	3.9165698741273257E-4	0.0126042
mir998	regulation_of_multicellular_organismal_process	85	3.85626	1.91867	12	4.5567695055206855E-4	0.0140269
mir998	leg_disc_morphogenesis	32	1.45177	1.17725	7	4.8783218290961026E-4	0.014391
mir998	imaginal_disc-derived_limb_morphogenesis	32	1.45177	1.17725	7	4.8783218290961026E-4	0.014391
mir998	photoreceptor_cell_development	64	2.90354	1.66488	10	5.89825408444283E-4	0.0167039
mir998	regulation_of_multicellular_organism_growth	25	1.1342	1.04055	6	7.312471696331313E-4	0.0199124
mir998	cell-cell_junction_assembly_and_maintenance	35	1.58787	1.23119	7	8.650983186226984E-4	0.0211203
mir998	cell_junction_assembly_and_maintenance	35	1.58787	1.23119	7	8.650983186226984E-4	0.0211203
mir998	negative_regulation_of_transcription,_DNA-dependent	116	5.26267	2.24141	14	8.097209288736477E-4	0.0212327
mir998	multicellular_organism_growth	26	1.17956	1.06115	6	9.142880020070493E-4	0.0215772
mir998	muscle_cell_differentiation	45	2.04155	1.39604	8	8.570534779111667E-4	0.0216712
mir998	establishment_and/or_maintenance_of_cell_polarity	107	4.85436	2.1527	13	0.00115053	0.024684
mir998	imaginal_disc_pattern_formation	94	4.26457	2.0177	12	0.00113646	0.0251441
mir998	brain_development	94	4.26457	2.0177	12	0.00113646	0.0251441
mir998	midgut_development	27	1.22493	1.08137	6	0.00113063	0.0258221
mir998	skeletal_muscle_development	95	4.30994	2.0284	12	0.00124775	0.0259826
mir998	neuron_recognition	48	2.17765	1.44182	8	0.00132986	0.0269011
mir998	apical_junction_assembly	28	1.2703	1.10121	6	0.00138409	0.0272205
mir998	cell_recognition	49	2.22302	1.45677	8	0.00152679	0.0277171
mir998	heart_development	72	3.26648	1.76587	10	0.00150335	0.0280098
mir998	photoreceptor_cell_morphogenesis	60	2.72207	1.61201	9	0.00147371	0.0281997
mir998	regulation_of_photoreceptor_cell_differentiation	20	0.907356	0.930694	5	0.00167957	0.0283128
mir998	larval_behavior	29	1.31567	1.1207	6	0.00167866	0.0289875
mir998	maintenance_of_protein_location_in_cell	29	1.31567	1.1207	6	0.00167866	0.0289875
mir998	cell-cell_junction_assembly	29	1.31567	1.1207	6	0.00167866	0.0289875
mir998	cell_junction_assembly	29	1.31567	1.1207	6	0.00167866	0.0289875
mir998	morphogenesis_of_a_polarized_epithelium	73	3.31185	1.77809	10	0.00167206	0.0295955
mir998	learning_and/or_memory	73	3.31185	1.77809	10	0.00167206	0.0295955
mir998	leg_morphogenesis	40	1.81471	1.3162	7	0.00196759	0.0323966
mir998	tracheal_outgrowth,_open_tracheal_system	21	0.952724	0.953678	5	0.00212258	0.0341542
mir998	striated_muscle_development	102	4.62752	2.1018	12	0.00230599	0.0354921
mir998	potassium_ion_transport	41	1.86008	1.33255	7	0.00228078	0.0358843
mir998	limb_morphogenesis	41	1.86008	1.33255	7	0.00228078	0.0358843
mir998	limb_development	41	1.86008	1.33255	7	0.00228078	0.0358843
mir998	adult_behavior	66	2.99428	1.69069	9	0.00289342	0.043586
mir998	cell-cell_adhesion	66	2.99428	1.69069	9	0.00289342	0.043586
mir998	developmental_growth	79	3.58406	1.84972	10	0.00303367	0.0438334
mir998	cellular_ion_homeostasis	43	1.95082	1.36467	7	0.00302109	0.044561
mir998	mesoderm_development	93	4.21921	2.00694	11	0.00330259	0.0458477
mir998	axon_extension	23	1.04346	0.998058	5	0.00325454	0.0460842
mir998	positive_regulation_of_macromolecule_metabolic_process	108	4.89972	2.16274	12	0.00371263	0.0486767
mir998	muscle_fiber_development	81	3.67479	1.87299	10	0.00364549	0.0486983
mir998	compound_eye_photoreceptor_development	56	2.5406	1.55735	8	0.00363367	0.0494738
mir998	regulation_of_cell_shape	95	4.30994	2.0284	11	0.00389635	0.0501566
mir998	eye_photoreceptor_cell_development	57	2.58596	1.57119	8	0.00406151	0.0513491
mir998	anatomical_structure_homeostasis	70	3.17575	1.74117	9	0.0043252	0.0537235
mir998	memory	35	1.58787	1.23119	6	0.00454719	0.055507
mir998	regulation_of_cell_morphogenesis	111	5.03583	2.19257	12	0.00463817	0.055658
mir998	ion_homeostasis	47	2.13229	1.42673	7	0.00503757	0.0594433
mir998	tissue_morphogenesis	72	3.26648	1.76587	9	0.00522212	0.0606108
mir998	chemosensory_behavior	86	3.90163	1.92993	10	0.00560643	0.0630056
mir998	chemical_homeostasis	60	2.72207	1.61201	8	0.00558014	0.0637216
mir998	M_phase_of_meiotic_cell_cycle	116	5.26267	2.24141	12	0.00658176	0.0728107
mir998	meiosis	116	5.26267	2.24141	12	0.00658176	0.0728107
mir998	nucleus_localization	27	1.22493	1.08137	5	0.00671748	0.0731689
mir998	skeletal_muscle_fiber_development	75	3.40259	1.80228	9	0.00682946	0.0732615
mir998	cellular_chemical_homeostasis	50	2.26839	1.47156	7	0.00711252	0.0740539
mir998	transmembrane_receptor_protein_tyrosine_kinase_signaling_pathway	117	5.30803	2.25105	12	0.00703803	0.074372
mir998	cell_fate_determination	117	5.30803	2.25105	12	0.00703803	0.074372
mir998	exocytosis	63	2.85817	1.65182	8	0.00749663	0.0769219
mir998	establishment_of_planar_polarity	63	2.85817	1.65182	8	0.00749663	0.0769219
mir998	establishment_of_tissue_polarity	63	2.85817	1.65182	8	0.00749663	0.0769219
mir998	DNA_recombination	39	1.76934	1.29964	6	0.00783545	0.07925
mir998	vesicle_organization_and_biogenesis	29	1.31567	1.1207	5	0.00916822	0.091424
mir998	protein_import	66	2.99428	1.69069	8	0.00987023	0.0970573
mir998	positive_regulation_of_growth	30	1.36103	1.13986	5	0.0105982	0.102788
mir998	establishment_and/or_maintenance_of_apical/basal_cell_polarity	30	1.36103	1.13986	5	0.0105982	0.102788
mir998	larval_development	67	3.03964	1.70345	8	0.0107733	0.103074
mir998	muscle_attachment	20	0.907356	0.930694	4	0.0114443	0.108035
mir998	axon_choice_point_recognition	20	0.907356	0.930694	4	0.0114443	0.108035
mir998	stem_cell_differentiation	31	1.4064	1.1587	5	0.0121733	0.109097
mir998	stem_cell_maintenance	31	1.4064	1.1587	5	0.0121733	0.109097
mir998	response_to_organic_substance	31	1.4064	1.1587	5	0.0121733	0.109097
mir998	stem_cell_development	31	1.4064	1.1587	5	0.0121733	0.109097
mir998	olfactory_behavior	82	3.72016	1.88451	9	0.0120344	0.109235
mir998	asymmetric_cell_division	55	2.49523	1.54338	7	0.0118854	0.109284
mir998	negative_regulation_of_transcription_from_RNA_polymerase_II_promoter	55	2.49523	1.54338	7	0.0118854	0.109284
mir998	gut_development	68	3.08501	1.71611	8	0.011736	0.10933
mir998	response_to_radiation	97	4.40068	2.04964	10	0.0127527	0.112861
mir998	negative_regulation_of_cell_differentiation	56	2.5406	1.55735	7	0.0130642	0.114191
mir998	proximal/distal_pattern_formation,_imaginal_disc	21	0.952724	0.953678	4	0.0136377	0.11775
mir998	organ_formation	44	1.99618	1.38044	6	0.0139978	0.117982
mir998	meiosis_I	44	1.99618	1.38044	6	0.0139978	0.117982
mir998	formation_of_organ_boundary	44	1.99618	1.38044	6	0.0139978	0.117982
mir998	regulation_of_organ_growth	32	1.45177	1.17725	5	0.0138997	0.118566
mir998	cytoplasm_organization_and_biogenesis	57	2.58596	1.57119	7	0.0143246	0.119315
mir998	protein_import_into_nucleus	58	2.63133	1.58491	7	0.0156693	0.126067
mir998	positive_regulation_of_macromolecule_biosynthetic_process	100	4.53678	2.0811	10	0.0155525	0.126565
mir998	head_segmentation	22	0.998092	0.97612	4	0.0160805	0.127921
mir998	regulation_of_hemocyte_differentiation	22	0.998092	0.97612	4	0.0160805	0.127921
mir998	establishment_and/or_maintenance_of_epithelial_cell_apical/basal_polarity	22	0.998092	0.97612	4	0.0160805	0.127921
mir998	long-term_memory	22	0.998092	0.97612	4	0.0160805	0.127921
mir998	establishment_of_ommatidial_polarity	45	2.04155	1.39604	6	0.0155464	0.127986
mir998	organ_growth	45	2.04155	1.39604	6	0.0155464	0.127986
mir998	olfactory_learning	45	2.04155	1.39604	6	0.0155464	0.127986
mir998	instar_larval_development	46	2.08692	1.41147	6	0.0172095	0.133893
mir998	hemocyte_differentiation	34	1.54251	1.21348	5	0.0178293	0.134288
mir998	imaginal_disc-derived_wing_margin_morphogenesis	34	1.54251	1.21348	5	0.0178293	0.134288
mir998	morphogenesis_of_embryonic_epithelium	102	4.62752	2.1018	10	0.017657	0.134421
mir998	nuclear_import	59	2.6767	1.59852	7	0.0171012	0.134529
mir998	circadian_rhythm	59	2.6767	1.59852	7	0.0171012	0.134529
mir998	germarium-derived_egg_chamber_formation	59	2.6767	1.59852	7	0.0171012	0.134529
mir998	cell_fate_specification	73	3.31185	1.77809	8	0.017519	0.13482
mir998	syncytium_formation_by_plasma_membrane_fusion	23	1.04346	0.998058	4	0.0187807	0.135681
mir998	retinal_cell_programmed_cell_death	23	1.04346	0.998058	4	0.0187807	0.135681
mir998	plasma_membrane_fusion	23	1.04346	0.998058	4	0.0187807	0.135681
mir998	cuticle_pattern_formation	23	1.04346	0.998058	4	0.0187807	0.135681
mir998	syncytium_formation	23	1.04346	0.998058	4	0.0187807	0.135681
mir998	myotube_differentiation	23	1.04346	0.998058	4	0.0187807	0.135681
mir998	proximal/distal_pattern_formation	23	1.04346	0.998058	4	0.0187807	0.135681
mir998	myoblast_fusion	23	1.04346	0.998058	4	0.0187807	0.135681
mir998	stress-activated_protein_kinase_signaling_pathway	47	2.13229	1.42673	6	0.0189907	0.135812
mir998	anterior/posterior_axis_specification	118	5.3534	2.26065	11	0.0186751	0.136309
mir998	rhythmic_process	60	2.72207	1.61201	7	0.0186228	0.137343
mir998	antimicrobial_humoral_response	88	3.99237	1.95224	9	0.0184653	0.137615
mir998	synaptic_vesicle_transport	89	4.03773	1.9633	9	0.0197408	0.139765
mir998	branching_morphogenesis_of_a_tube	35	1.58787	1.23119	5	0.0200429	0.140499
mir998	gland_morphogenesis	48	2.17765	1.44182	6	0.0208936	0.145026
mir998	salivary_gland_morphogenesis	48	2.17765	1.44182	6	0.0208936	0.145026
mir998	germ-line_stem_cell_maintenance	24	1.08883	1.01952	4	0.0217451	0.149471
mir998	lipid_modification	24	1.08883	1.01952	4	0.0217451	0.149471
mir998	meiotic_recombination	24	1.08883	1.01952	4	0.0217451	0.149471
mir998	positive_regulation_of_transcription	91	4.12847	1.98524	9	0.0224804	0.151582
mir998	membrane_fusion	36	1.63324	1.24866	5	0.0224289	0.152689
mir998	synaptic_vesicle_endocytosis	36	1.63324	1.24866	5	0.0224289	0.152689
mir998	learning	49	2.22302	1.45677	6	0.0229213	0.153097
mir998	positive_regulation_of_gene_expression	92	4.17384	1.99612	9	0.0239476	0.158457
mir998	formation_of_anatomical_boundary	50	2.26839	1.47156	6	0.0250771	0.162886
mir998	amine_transport	37	1.67861	1.26588	5	0.0249912	0.163832
mir998	positive_regulation_of_nucleobase,_nucleoside,_nucleotide_and_nucleic_acid_metabolic_process	94	4.26457	2.0177	9	0.0270838	0.174321
mir998	morphogenesis_of_a_branching_structure	38	1.72398	1.28287	5	0.0277339	0.176897
mir998	lymph_gland_development	26	1.17956	1.06115	4	0.0284877	0.180083
mir998	humoral_immune_response	95	4.30994	2.0284	9	0.0287556	0.180168
mir998	regulation_of_cell_size	52	2.35913	1.5007	6	0.0297838	0.183365
mir998	gastrulation	66	2.99428	1.69069	7	0.0297762	0.184926
mir998	hemopoietic_or_lymphoid_organ_development	66	2.99428	1.69069	7	0.0297762	0.184926
mir998	immune_system_development	66	2.99428	1.69069	7	0.0297762	0.184926
mir998	morphogenesis_of_follicular_epithelium	27	1.22493	1.08137	4	0.0322738	0.196981
mir998	rhythmic_behavior	41	1.86008	1.33255	5	0.0370746	0.224349
mir998	tripartite_regional_subdivision	55	2.49523	1.54338	6	0.0378689	0.227213
mir998	determination_of_anterior/posterior_axis,_embryo	55	2.49523	1.54338	6	0.0378689	0.227213
mir998	developmental_programmed_cell_death	29	1.31567	1.1207	4	0.0406874	0.240056
mir998	imaginal_disc-derived_wing_vein_morphogenesis	29	1.31567	1.1207	4	0.0406874	0.240056
mir998	adult_locomotory_behavior	42	1.90545	1.3487	5	0.0405672	0.241358
mir998	oocyte_development	102	4.62752	2.1018	9	0.0425112	0.248743
mir998	embryonic_organ_development	43	1.95082	1.36467	5	0.0442524	0.254721
mir998	secretion_by_cell	119	5.39877	2.27021	10	0.0446791	0.255103
mir998	regulation_of_cellular_biosynthetic_process	87	3.947	1.94112	8	0.0440235	0.255481
mir998	imaginal_disc_growth	30	1.36103	1.13986	4	0.0453165	0.256673
mir998	regulation_of_behavior	30	1.36103	1.13986	4	0.0453165	0.256673
mir998	regulation_of_Ras_protein_signal_transduction	73	3.31185	1.77809	7	0.0476095	0.26752
mir998	female_meiosis_chromosome_segregation	31	1.4064	1.1587	4	0.0502266	0.280004
mir998	positive_regulation_of_developmental_process	59	2.6767	1.59852	6	0.0506414	0.28011
mir998	carboxylic_acid_transport	45	2.04155	1.39604	5	0.0522043	0.286516
mir998	alcohol_catabolic_process	45	2.04155	1.39604	5	0.0522043	0.286516
mir998	organic_acid_transport	45	2.04155	1.39604	5	0.0522043	0.286516
mir998	epidermal_growth_factor_receptor_signaling_pathway	45	2.04155	1.39604	5	0.0522043	0.286516
mir998	JNK_cascade	45	2.04155	1.39604	5	0.0522043	0.286516
mir998	Wnt_receptor_signaling_pathway	75	3.40259	1.80228	7	0.0537284	0.292613
mir998	ventral_cord_development	32	1.45177	1.17725	4	0.0554162	0.299501
mir998	nuclear_transport	92	4.17384	1.99612	8	0.0577597	0.309802
mir998	nucleocytoplasmic_transport	92	4.17384	1.99612	8	0.0577597	0.309802
mir998	cell_growth	47	2.13229	1.42673	5	0.060934	0.319565
mir998	regulation_of_response_to_stimulus	47	2.13229	1.42673	5	0.060934	0.319565
mir998	carbohydrate_catabolic_process	77	3.49332	1.82615	7	0.0603167	0.321084
mir998	cellular_carbohydrate_catabolic_process	62	2.8128	1.63866	6	0.0617566	0.321498
mir998	positive_regulation_of_cellular_biosynthetic_process	33	1.49714	1.1955	4	0.0608828	0.321679
mir998	taxis	33	1.49714	1.1955	4	0.0608828	0.321679
mir998	torso_signaling_pathway	33	1.49714	1.1955	4	0.0608828	0.321679
mir998	cellular_homeostasis	110	4.99046	2.18267	9	0.0629536	0.325337
mir998	Ras_protein_signal_transduction	94	4.26457	2.0177	8	0.0639339	0.328009
mir998	response_to_temperature_stimulus	63	2.85817	1.65182	6	0.0657571	0.334935
mir998	MAPKKK_cascade	63	2.85817	1.65182	6	0.0657571	0.334935
mir998	nuclear_migration	21	0.952724	0.953678	3	0.0674826	0.338849
mir998	actin_filament_bundle_formation	21	0.952724	0.953678	3	0.0674826	0.338849
mir998	organelle_localization	79	3.58406	1.84972	7	0.0673784	0.340742
mir998	actin_filament_organization	79	3.58406	1.84972	7	0.0673784	0.340742
mir998	embryonic_axis_specification	64	2.90354	1.66488	6	0.0699053	0.348542
mir998	multicellular_organismal_aging	80	3.62942	1.86139	7	0.0710873	0.351957
mir998	aging	80	3.62942	1.86139	7	0.0710873	0.351957
mir998	determination_of_adult_life_span	80	3.62942	1.86139	7	0.0710873	0.351957
mir998	oocyte_differentiation	113	5.12656	2.21223	9	0.0719888	0.353945
mir998	amino_acid_transport	35	1.58787	1.23119	4	0.0726337	0.354653
mir998	oocyte_anterior/posterior_axis_determination	65	2.94891	1.67783	6	0.074201	0.359824
mir998	salivary_gland_boundary_specification	22	0.998092	0.97612	3	0.0755987	0.361648
mir998	vitamin_metabolic_process	22	0.998092	0.97612	3	0.0755987	0.361648
mir998	sensory_organ_boundary_specification	22	0.998092	0.97612	3	0.0755987	0.361648
mir998	response_to_oxidative_stress	50	2.26839	1.47156	5	0.0754787	0.36353
mir998	regulation_of_developmental_growth	36	1.63324	1.24866	4	0.0789092	0.374951
mir998	actomyosin_structure_organization_and_biogenesis	36	1.63324	1.24866	4	0.0789092	0.374951
mir998	wing_disc_pattern_formation	67	3.03964	1.70345	6	0.083232	0.390253
mir998	positive_regulation_of_transcription,_DNA-dependent	67	3.03964	1.70345	6	0.083232	0.390253
mir998	response_to_light_stimulus	83	3.76553	1.89597	7	0.0829265	0.391413
mir998	regulation_of_circadian_rhythm	23	1.04346	0.998058	3	0.0841214	0.391829
mir998	cellular_di-,_tri-valent_inorganic_cation_homeostasis	23	1.04346	0.998058	3	0.0841214	0.391829
mir998	immune_effector_process	37	1.67861	1.26588	4	0.0854448	0.395391
mir998	synaptic_vesicle_exocytosis	52	2.35913	1.5007	5	0.0861261	0.395956
mir998	positive_regulation_of_RNA_metabolic_process	68	3.08501	1.71611	6	0.0879656	0.401804
mir998	regulation_of_antimicrobial_peptide_biosynthetic_process	24	1.08883	1.01952	3	0.0930323	0.414257
mir998	positive_regulation_of_antimicrobial_peptide_biosynthetic_process	24	1.08883	1.01952	3	0.0930323	0.414257
mir998	antimicrobial_peptide_biosynthetic_process	24	1.08883	1.01952	3	0.0930323	0.414257
mir998	di-,_tri-valent_inorganic_cation_homeostasis	24	1.08883	1.01952	3	0.0930323	0.414257
mir998	anti-apoptosis	24	1.08883	1.01952	3	0.0930323	0.414257
mir998	antimicrobial_peptide_production	24	1.08883	1.01952	3	0.0930323	0.414257
mir998	production_of_molecular_mediator_of_immune_response	24	1.08883	1.01952	3	0.0930323	0.414257
mir998	establishment_of_nucleus_localization	24	1.08883	1.01952	3	0.0930323	0.414257
mir998	dorsal_closure	85	3.85626	1.91867	7	0.0914095	0.414858
mir998	regulation_of_localization	85	3.85626	1.91867	7	0.0914095	0.414858
mir998	response_to_DNA_damage_stimulus	102	4.62752	2.1018	8	0.092584	0.41487
mir998	circadian_behavior	38	1.72398	1.28287	4	0.0922343	0.415935
mir998	ectoderm_development	70	3.17575	1.74117	6	0.0978632	0.430355
mir998	hemopoiesis	54	2.44986	1.52929	5	0.097514	0.431499
mir998	dorsal/ventral_pattern_formation,_imaginal_disc	54	2.44986	1.52929	5	0.097514	0.431499
mir998	gliogenesis	39	1.76934	1.29964	4	0.0992713	0.433852
mir998	regulation_of_Rho_protein_signal_transduction	25	1.1342	1.04055	3	0.102312	0.444399
mir998	germ-line_stem_cell_division	25	1.1342	1.04055	3	0.102312	0.444399
mir998	regulation_of_Rab_protein_signal_transduction	25	1.1342	1.04055	3	0.102312	0.444399
mir998	regulation_of_Rab_GTPase_activity	25	1.1342	1.04055	3	0.102312	0.444399
mir998	Rab_protein_signal_transduction	25	1.1342	1.04055	3	0.102312	0.444399
mir998	regulation_of_pole_plasm_oskar_mRNA_localization	25	1.1342	1.04055	3	0.102312	0.444399
mir998	peptide_biosynthetic_process	25	1.1342	1.04055	3	0.102312	0.444399
mir998	carbohydrate_biosynthetic_process	55	2.49523	1.54338	5	0.103478	0.446724
mir998	regulation_of_small_GTPase_mediated_signal_transduction	88	3.99237	1.95224	7	0.105007	0.450574
mir998	regulation_of_tube_architecture,_open_tracheal_system	40	1.81471	1.3162	4	0.106549	0.454438
mir998	glucose_metabolic_process	56	2.5406	1.55735	5	0.109619	0.464732
mir998	stem_cell_division	26	1.17956	1.06115	3	0.111942	0.471754
mir998	mesoderm_formation	26	1.17956	1.06115	3	0.111942	0.471754
mir998	cellular_cation_homeostasis	26	1.17956	1.06115	3	0.111942	0.471754
mir998	epidermis_morphogenesis	41	1.86008	1.33255	4	0.11406	0.477836
mir998	glucose_catabolic_process	41	1.86008	1.33255	4	0.11406	0.477836
mir998	monosaccharide_catabolic_process	41	1.86008	1.33255	4	0.11406	0.477836
mir998	hexose_catabolic_process	41	1.86008	1.33255	4	0.11406	0.477836
mir998	Notch_signaling_pathway	57	2.58596	1.57119	5	0.115932	0.482822
mir998	posttranscriptional_regulation_of_gene_expression	108	4.89972	2.16274	8	0.118187	0.489334
mir998	Rho_protein_signal_transduction	27	1.22493	1.08137	3	0.1219	0.501774
mir998	eye_pigment_biosynthetic_process	27	1.22493	1.08137	3	0.1219	0.501774
mir998	mesoderm_morphogenesis	27	1.22493	1.08137	3	0.1219	0.501774
mir998	mushroom_body_development	43	1.95082	1.36467	4	0.129749	0.527944
mir998	positive_regulation_of_signal_transduction	43	1.95082	1.36467	4	0.129749	0.527944
mir998	regulation_of_neurogenesis	43	1.95082	1.36467	4	0.129749	0.527944
mir998	regulation_of_translation	59	2.6767	1.59852	5	0.129059	0.52817
mir998	regulation_of_RNA_splicing	59	2.6767	1.59852	5	0.129059	0.52817
mir998	regulation_of_nuclear_mRNA_splicing,_via_spliceosome	59	2.6767	1.59852	5	0.129059	0.52817
mir998	female_meiosis	59	2.6767	1.59852	5	0.129059	0.52817
mir998	imaginal_disc-derived_wing_vein_specification	28	1.2703	1.10121	3	0.132167	0.534711
mir998	eye_pigment_metabolic_process	28	1.2703	1.10121	3	0.132167	0.534711
mir998	formation_of_primary_germ_layer	28	1.2703	1.10121	3	0.132167	0.534711
mir998	regulation_of_Wnt_receptor_signaling_pathway	28	1.2703	1.10121	3	0.132167	0.534711
mir998	protein_targeting_to_mitochondrion	28	1.2703	1.10121	3	0.132167	0.534711
mir998	dorsal_appendage_formation	28	1.2703	1.10121	3	0.132167	0.534711
mir998	regulation_of_mRNA_processing	60	2.72207	1.61201	5	0.135864	0.546544
mir998	bristle_morphogenesis	44	1.99618	1.38044	4	0.137911	0.551643
mir998	hexose_metabolic_process	78	3.53869	1.83797	6	0.142923	0.555985
mir998	cuticle_development	61	2.76744	1.62539	5	0.142825	0.558673
mir998	oocyte_axis_determination	95	4.30994	2.0284	7	0.14065	0.559438
mir998	negative_regulation_of_signal_transduction	95	4.30994	2.0284	7	0.14065	0.559438
mir998	regulation_of_protein_import_into_nucleus	29	1.31567	1.1207	3	0.142723	0.561375
mir998	dephosphorylation	113	5.12656	2.21223	8	0.142102	0.562059
mir998	cofactor_biosynthetic_process	45	2.04155	1.39604	4	0.146272	0.565906
mir998	pigment_biosynthetic_process	45	2.04155	1.39604	4	0.146272	0.565906
mir998	aromatic_compound_metabolic_process	79	3.58406	1.84972	6	0.149132	0.573834
mir998	regulation_of_intracellular_protein_transport	30	1.36103	1.13986	3	0.153545	0.587623
mir998	cation_homeostasis	30	1.36103	1.13986	3	0.153545	0.587623
mir998	regulation_of_protein_transport	30	1.36103	1.13986	3	0.153545	0.587623
mir998	monosaccharide_metabolic_process	80	3.62942	1.86139	6	0.15546	0.59175
mir998	oocyte_construction	98	4.44604	2.06018	7	0.157502	0.596316
mir998	heterocycle_metabolic_process	81	3.67479	1.87299	6	0.161903	0.609722
mir998	regulation_of_intracellular_transport	31	1.4064	1.1587	3	0.164615	0.616654
mir998	regulation_of_nucleocytoplasmic_transport	31	1.4064	1.1587	3	0.164615	0.616654
mir998	peptide_metabolic_process	31	1.4064	1.1587	3	0.164615	0.616654
mir998	regulation_of_neurotransmitter_levels	118	5.3534	2.26065	8	0.168208	0.626795
mir998	meiotic_chromosome_segregation	48	2.17765	1.44182	4	0.172465	0.639294
mir998	wing_disc_dorsal/ventral_pattern_formation	48	2.17765	1.44182	4	0.172465	0.639294
mir998	acetyl-CoA_metabolic_process	32	1.45177	1.17725	3	0.175912	0.641987
mir998	gastrulation_with_mouth_forming_first	32	1.45177	1.17725	3	0.175912	0.641987
mir998	gastrulation_involving_germ_band_extension	32	1.45177	1.17725	3	0.175912	0.641987
mir998	sulfur_metabolic_process	32	1.45177	1.17725	3	0.175912	0.641987
mir998	cofactor_metabolic_process	101	4.58215	2.09147	7	0.175222	0.642784
mir998	protein_kinase_cascade	83	3.76553	1.89597	6	0.175124	0.645771
mir998	glycoprotein_biosynthetic_process	49	2.22302	1.45677	4	0.181534	0.655745
mir998	regulation_of_programmed_cell_death	102	4.62752	2.1018	7	0.181311	0.658299
mir998	translational_initiation	67	3.03964	1.70345	5	0.187571	0.670709
mir998	spindle_assembly	33	1.49714	1.1955	3	0.187415	0.673551
mir998	regulation_of_Ras_GTPase_activity	33	1.49714	1.1955	3	0.187415	0.673551
mir998	glycolysis	33	1.49714	1.1955	3	0.187415	0.673551
mir998	induction_of_programmed_cell_death	33	1.49714	1.1955	3	0.187415	0.673551
mir998	glycoprotein_metabolic_process	50	2.26839	1.47156	4	0.190756	0.67867
mir998	pole_plasm_assembly	50	2.26839	1.47156	4	0.190756	0.67867
mir998	neurotransmitter_secretion	104	4.71825	2.12231	7	0.193748	0.685868
mir998	anion_transport	34	1.54251	1.21348	3	0.199104	0.701322
mir998	asymmetric_protein_localization	34	1.54251	1.21348	3	0.199104	0.701322
mir998	bristle_development	51	2.31376	1.4862	4	0.200122	0.701417
mir998	epidermis_development	51	2.31376	1.4862	4	0.200122	0.701417
mir998	protein_amino_acid_dephosphorylation	87	3.947	1.94112	6	0.202803	0.707311
mir998	coenzyme_metabolic_process	87	3.947	1.94112	6	0.202803	0.707311
mir998	generation_of_a_signal_involved_in_cell-cell_signaling	106	4.80899	2.14262	7	0.206512	0.71672
mir998	DNA_repair	88	3.99237	1.95224	6	0.209958	0.725125
mir998	lipid_biosynthetic_process	107	4.85436	2.1527	7	0.213011	0.732095
mir998	ubiquitin-dependent_protein_catabolic_process	107	4.85436	2.1527	7	0.213011	0.732095
mir998	eggshell_formation	71	3.22111	1.75356	5	0.219847	0.75194
mir998	chorion-containing_eggshell_formation	71	3.22111	1.75356	5	0.219847	0.75194
mir998	transforming_growth_factor_beta_receptor_signaling_pathway	36	1.63324	1.24866	3	0.222965	0.75894
mir998	modification-dependent_protein_catabolic_process	109	4.94509	2.17273	7	0.226226	0.766352
mir998	chromosome_segregation	109	4.94509	2.17273	7	0.226226	0.766352
mir998	sulfur_compound_biosynthetic_process	20	0.907356	0.930694	2	0.229341	0.773206
mir998	protein_depolymerization	20	0.907356	0.930694	2	0.229341	0.773206
mir998	motor_axon_guidance	20	0.907356	0.930694	2	0.229341	0.773206
mir998	establishment_of_imaginal_disc-derived_wing_hair_orientation	20	0.907356	0.930694	2	0.229341	0.773206
mir998	regulation_of_transcription_factor_import_into_nucleus	20	0.907356	0.930694	2	0.229341	0.773206
mir998	transcription_factor_import_into_nucleus	20	0.907356	0.930694	2	0.229341	0.773206
mir998	nucleotide-excision_repair	20	0.907356	0.930694	2	0.229341	0.773206
mir998	proteolysis_involved_in_cellular_protein_catabolic_process	110	4.99046	2.18267	7	0.232936	0.77792
mir998	modification-dependent_macromolecule_catabolic_process	110	4.99046	2.18267	7	0.232936	0.77792
mir998	cellular_protein_catabolic_process	110	4.99046	2.18267	7	0.232936	0.77792
mir998	ribonucleoprotein_complex_assembly	91	4.12847	1.98524	6	0.231931	0.778234
mir998	membrane_lipid_metabolic_process	91	4.12847	1.98524	6	0.231931	0.778234
mir998	eye_pigmentation	37	1.67861	1.26588	3	0.2351	0.781458
mir998	positive_regulation_of_transcription_from_RNA_polymerase_II_promoter	37	1.67861	1.26588	3	0.2351	0.781458
mir998	regulation_of_GTPase_activity	37	1.67861	1.26588	3	0.2351	0.781458
mir998	neuroblast_proliferation	37	1.67861	1.26588	3	0.2351	0.781458
mir998	head_involution	37	1.67861	1.26588	3	0.2351	0.781458
mir998	autophagic_cell_death	73	3.31185	1.77809	5	0.236582	0.78271
mir998	salivary_gland_histolysis	73	3.31185	1.77809	5	0.236582	0.78271
mir998	salivary_gland_cell_autophagic_cell_death	73	3.31185	1.77809	5	0.236582	0.78271
mir998	coenzyme_biosynthetic_process	38	1.72398	1.28287	3	0.247345	0.810743
mir998	transmembrane_receptor_protein_serine/threonine_kinase_signaling_pathway	38	1.72398	1.28287	3	0.247345	0.810743
mir998	periodic_partitioning	38	1.72398	1.28287	3	0.247345	0.810743
mir998	ovarian_nurse_cell_to_oocyte_transport	38	1.72398	1.28287	3	0.247345	0.810743
mir998	lipid_catabolic_process	38	1.72398	1.28287	3	0.247345	0.810743
mir998	glial_cell_migration	21	0.952724	0.953678	2	0.246378	0.81133
mir998	RNA_export_from_nucleus	21	0.952724	0.953678	2	0.246378	0.81133
mir998	pigment_metabolic_process	56	2.5406	1.55735	4	0.248767	0.811644
mir998	tissue_death	75	3.40259	1.80228	5	0.253652	0.823789
mir998	histolysis	75	3.40259	1.80228	5	0.253652	0.823789
mir998	epidermal_cell_differentiation	39	1.76934	1.29964	3	0.259685	0.839529
mir998	Toll_signaling_pathway	39	1.76934	1.29964	3	0.259685	0.839529
mir998	pole_plasm_oskar_mRNA_localization	39	1.76934	1.29964	3	0.259685	0.839529
mir998	mRNA_transport	22	0.998092	0.97612	2	0.263456	0.847851
mir998	rhabdomere_development	22	0.998092	0.97612	2	0.263456	0.847851
mir998	neuroblast_division	22	0.998092	0.97612	2	0.263456	0.847851
mir998	asymmetric_neuroblast_division	22	0.998092	0.97612	2	0.263456	0.847851
mir998	response_to_heat	58	2.63133	1.58491	4	0.268894	0.861435
mir998	regulation_of_synapse_structure_and_activity	40	1.81471	1.3162	3	0.272101	0.867782
mir998	smoothened_signaling_pathway	40	1.81471	1.3162	3	0.272101	0.867782
mir998	energy_derivation_by_oxidation_of_organic_compounds	40	1.81471	1.3162	3	0.272101	0.867782
mir998	dorsal/ventral_axis_specification	59	2.6767	1.59852	4	0.279064	0.885997
mir998	positive_regulation_of_transport	23	1.04346	0.998058	2	0.280536	0.886694
mir998	endosome_transport	23	1.04346	0.998058	2	0.280536	0.886694
mir998	cardiac_cell_differentiation	23	1.04346	0.998058	2	0.280536	0.886694
mir998	response_to_steroid_hormone_stimulus	23	1.04346	0.998058	2	0.280536	0.886694
mir998	response_to_ecdysone	23	1.04346	0.998058	2	0.280536	0.886694
mir998	protein_ubiquitination	41	1.86008	1.33255	3	0.284578	0.895473
mir998	intracellular_mRNA_localization	60	2.72207	1.61201	4	0.289293	0.906279
mir998	pigmentation	60	2.72207	1.61201	4	0.289293	0.906279
mir998	regulation_of_cell_growth	24	1.08883	1.01952	2	0.297582	0.92407
mir998	glutamine_family_amino_acid_metabolic_process	24	1.08883	1.01952	2	0.297582	0.92407
mir998	regulation_of_JNK_cascade	24	1.08883	1.01952	2	0.297582	0.92407
mir998	response_to_nutrient_levels	24	1.08883	1.01952	2	0.297582	0.92407
mir998	response_to_extracellular_stimulus	24	1.08883	1.01952	2	0.297582	0.92407
mir998	positive_regulation_of_programmed_cell_death	42	1.90545	1.3487	3	0.2971	0.926637
mir998	phosphoinositide_metabolic_process	42	1.90545	1.3487	3	0.2971	0.926637
mir998	cellular_protein_complex_assembly	81	3.67479	1.87299	5	0.30641	0.947328
mir998	pole_plasm_mRNA_localization	43	1.95082	1.36467	3	0.309651	0.953187
mir998	gut_morphogenesis	43	1.95082	1.36467	3	0.309651	0.953187
mir998	ectodermal_gut_morphogenesis	43	1.95082	1.36467	3	0.309651	0.953187
mir998	synaptogenesis	43	1.95082	1.36467	3	0.309651	0.953187
mir998	ectodermal_gut_development	43	1.95082	1.36467	3	0.309651	0.953187
mir998	embryonic_gut_morphogenesis	25	1.1342	1.04055	2	0.314562	0.964111
mir998	neuroblast_fate_determination	25	1.1342	1.04055	2	0.314562	0.964111
mir998	embryonic_ectodermal_gut_morphogenesis	25	1.1342	1.04055	2	0.314562	0.964111
mir998	embryonic_organ_morphogenesis	25	1.1342	1.04055	2	0.314562	0.964111
mir998	response_to_hormone_stimulus	25	1.1342	1.04055	2	0.314562	0.964111
mir998	embryonic_digestive_tract_morphogenesis	25	1.1342	1.04055	2	0.314562	0.964111
mir998	embryonic_ectodermal_gut_development	25	1.1342	1.04055	2	0.314562	0.964111
mir998	ommatidial_rotation	25	1.1342	1.04055	2	0.314562	0.964111
mir998	embryonic_hindgut_morphogenesis	25	1.1342	1.04055	2	0.314562	0.964111
mir998	synapse_organization_and_biogenesis	63	2.85817	1.65182	4	0.320243	0.977293
mir998	protein_modification_by_small_protein_conjugation	44	1.99618	1.38044	3	0.322218	0.979099
mir998	digestive_tract_morphogenesis	44	1.99618	1.38044	3	0.322218	0.979099
mir998	pole_plasm_RNA_localization	44	1.99618	1.38044	3	0.322218	0.979099
mir998	negative_regulation_of_apoptosis	44	1.99618	1.38044	3	0.322218	0.979099
mir998	transmembrane_transport	83	3.76553	1.89597	5	0.324358	0.98139
mir998	polyol_metabolic_process	26	1.17956	1.06115	2	0.331447	0.998571
mir998	RNA_interference	26	1.17956	1.06115	2	0.331447	0.998571
mir998	embryonic_gut_development	26	1.17956	1.06115	2	0.331447	0.998571
mir998	epithelial_cell_migration,_open_tracheal_system	26	1.17956	1.06115	2	0.331447	0.998571
mir998	regulation_of_MAPKKK_cascade	26	1.17956	1.06115	2	0.331447	0.998571
mir998	response_to_endogenous_stimulus	26	1.17956	1.06115	2	0.331447	0.998571
mir998	epithelial_cell_migration	26	1.17956	1.06115	2	0.331447	0.998571
mir998	cell_cycle_checkpoint	23	1.04346	0.998058	1	0.65626	1
mir998	purine_ribonucleoside_triphosphate_biosynthetic_process	93	4.21921	2.00694	5	0.414872	1
mir998	negative_regulation_of_gene_expression,_epigenetic	38	1.72398	1.28287	2	0.519333	1
mir998	microtubule_organizing_center_organization_and_biogenesis	53	2.40449	1.51506	0	1	1
mir998	rhodopsin_mediated_signaling_pathway	20	0.907356	0.930694	0	1	1
mir998	chromatin_modification	108	4.89972	2.16274	5	0.545482	1
mir998	nuclear_organization_and_biogenesis	31	1.4064	1.1587	2	0.413613	1
mir998	posttranscriptional_gene_silencing	35	1.58787	1.23119	2	0.475569	1
mir998	vesicle_docking	29	1.31567	1.1207	1	0.739837	1
mir998	chitin-based_cuticle_development	38	1.72398	1.28287	2	0.519333	1
mir998	fatty_acid_biosynthetic_process	27	1.22493	1.08137	1	0.714521	1
mir998	biogenic_amine_metabolic_process	31	1.4064	1.1587	1	0.762907	1
mir998	multicellular_organism_reproduction	57	2.58596	1.57119	2	0.737036	1
mir998	cyclic_nucleotide_metabolic_process	28	1.2703	1.10121	1	0.727473	1
mir998	electron_transport_chain	74	3.35722	1.79023	1	0.967799	1
mir998	mRNA_catabolic_process	23	1.04346	0.998058	1	0.65626	1
mir998	male_meiosis	33	1.49714	1.1955	2	0.445075	1
mir998	peptidyl-amino_acid_modification	44	1.99618	1.38044	2	0.599232	1
mir998	detection_of_light_stimulus	50	2.26839	1.47156	1	0.90187	1
mir998	calcium_ion_transport	30	1.36103	1.13986	1	0.75164	1
mir998	regulation_of_tube_size,_open_tracheal_system	21	0.952724	0.953678	1	0.622812	1
mir998	biopolymer_glycosylation	47	2.13229	1.42673	3	0.359871	1
mir998	cellularization	67	3.03964	1.70345	4	0.361818	1
mir998	molting_cycle	48	2.17765	1.44182	1	0.892321	1
mir998	pole_cell_migration	20	0.907356	0.930694	1	0.604887	1
mir998	protein_amino_acid_glycosylation	47	2.13229	1.42673	3	0.359871	1
mir998	segment_polarity_determination	27	1.22493	1.08137	2	0.34821	1
mir998	hormone_metabolic_process	29	1.31567	1.1207	1	0.739837	1
mir998	detection_of_stimulus_involved_in_sensory_perception	68	3.08501	1.71611	0	1	1
mir998	rRNA_metabolic_process	35	1.58787	1.23119	1	0.803092	1
mir998	amino_sugar_metabolic_process	105	4.76362	2.13249	3	0.860122	1
mir998	chromatin_remodeling	67	3.03964	1.70345	4	0.361818	1
mir998	male_courtship_behavior	28	1.2703	1.10121	0	1	1
mir998	regulation_of_G-protein_coupled_receptor_protein_signaling_pathway	23	1.04346	0.998058	0	1	1
mir998	lipoprotein_biosynthetic_process	29	1.31567	1.1207	1	0.739837	1
mir998	mitotic_sister_chromatid_segregation	46	2.08692	1.41147	3	0.34734	1
mir998	gene_silencing_by_RNA	35	1.58787	1.23119	2	0.475569	1
mir998	mating_behavior	59	2.6767	1.59852	2	0.754213	1
mir998	zygotic_determination_of_anterior/posterior_axis,_embryo	28	1.2703	1.10121	1	0.727473	1
mir998	reproductive_developmental_process	76	3.44795	1.81426	3	0.675773	1
mir998	cellular_polysaccharide_metabolic_process	111	5.03583	2.19257	4	0.746494	1
mir998	terminal_region_determination	21	0.952724	0.953678	0	1	1
mir998	nucleobase,_nucleoside,_nucleotide_and_nucleic_acid_transport	58	2.63133	1.58491	2	0.745749	1
mir998	male_gamete_generation	116	5.26267	2.24141	6	0.431071	1
mir998	steroid_metabolic_process	30	1.36103	1.13986	1	0.75164	1
mir998	oocyte_fate_determination	24	1.08883	1.01952	1	0.671855	1
mir998	defense_response_to_fungus	29	1.31567	1.1207	2	0.381281	1
mir998	ATP_synthesis_coupled_proton_transport	68	3.08501	1.71611	3	0.601071	1
mir998	negative_regulation_of_growth	25	1.1342	1.04055	1	0.686742	1
mir998	chitin_metabolic_process	95	4.30994	2.0284	2	0.933019	1
mir998	molting_cycle,_protein-based_cuticle	48	2.17765	1.44182	1	0.892321	1
mir998	nucleosome_assembly	24	1.08883	1.01952	0	1	1
mir998	negative_regulation_of_translation	35	1.58787	1.23119	1	0.803092	1
mir998	histone_modification	50	2.26839	1.47156	1	0.90187	1
mir998	cell_projection_biogenesis	71	3.22111	1.75356	4	0.403294	1
mir998	mitotic_cell_cycle,_embryonic	26	1.17956	1.06115	1	0.700954	1
mir998	cofactor_catabolic_process	31	1.4064	1.1587	2	0.413613	1
mir998	cellular_protein_complex_disassembly	28	1.2703	1.10121	2	0.364829	1
mir998	sister_chromatid_segregation	47	2.13229	1.42673	3	0.359871	1
mir998	germ_cell_migration	39	1.76934	1.29964	2	0.533368	1
mir998	ATP_synthesis_coupled_electron_transport	68	3.08501	1.71611	1	0.957455	1
mir998	nucleoside_metabolic_process	21	0.952724	0.953678	1	0.622812	1
mir998	amino_acid_activation	60	2.72207	1.61201	2	0.762433	1
mir998	regulation_of_proteolysis	34	1.54251	1.21348	1	0.793734	1
mir998	defense_response_to_bacterium	68	3.08501	1.71611	2	0.819964	1
mir998	energy_coupled_proton_transport,_down_electrochemical_gradient	68	3.08501	1.71611	3	0.601071	1
mir998	mitochondrion_organization_and_biogenesis	77	3.49332	1.82615	4	0.464391	1
mir998	nucleoside_monophosphate_biosynthetic_process	23	1.04346	0.998058	0	1	1
mir998	N-acetylglucosamine_metabolic_process	104	4.71825	2.12231	3	0.855733	1
mir998	glycerophospholipid_metabolic_process	47	2.13229	1.42673	3	0.359871	1
mir998	translational_elongation	20	0.907356	0.930694	0	1	1
mir998	fatty_acid_metabolic_process	56	2.5406	1.55735	3	0.469744	1
mir998	ribonucleoside_monophosphate_biosynthetic_process	21	0.952724	0.953678	0	1	1
mir998	sodium_ion_transport	60	2.72207	1.61201	2	0.762433	1
mir998	gonad_development	29	1.31567	1.1207	1	0.739837	1
mir998	establishment_of_organelle_localization	69	3.13038	1.72869	4	0.382597	1
mir998	nuclear_export	29	1.31567	1.1207	2	0.381281	1
mir998	mating	65	2.94891	1.67783	3	0.570291	1
mir998	regulation_of_synaptogenesis	22	0.998092	0.97612	1	0.639924	1
mir998	phosphoinositide_biosynthetic_process	24	1.08883	1.01952	1	0.671855	1
mir998	nucleoside_monophosphate_metabolic_process	23	1.04346	0.998058	0	1	1
mir998	neuropeptide_signaling_pathway	34	1.54251	1.21348	2	0.460448	1
mir998	macromolecular_complex_disassembly	29	1.31567	1.1207	2	0.381281	1
mir998	protein_polymerization	29	1.31567	1.1207	0	1	1
mir998	regulation_of_apoptosis	86	3.90163	1.92993	5	0.351466	1
mir998	cytokinesis	72	3.26648	1.76587	3	0.639784	1
mir998	innate_immune_response	54	2.44986	1.52929	3	0.445957	1
mir998	centrosome_duplication	21	0.952724	0.953678	0	1	1
mir998	germarium-derived_oocyte_differentiation	24	1.08883	1.01952	1	0.671855	1
mir998	chromatin_assembly	66	2.99428	1.69069	2	0.806882	1
mir998	extracellular_structure_organization_and_biogenesis	84	3.8109	1.90736	5	0.333374	1
mir998	sperm_individualization	23	1.04346	0.998058	1	0.65626	1
mir998	nucleoside_triphosphate_metabolic_process	96	4.35531	2.03905	5	0.441804	1
mir998	detection_of_stimulus	81	3.67479	1.87299	1	0.976734	1
mir998	interphase	37	1.67861	1.26588	2	0.505018	1
mir998	detection_of_external_stimulus	60	2.72207	1.61201	1	0.938317	1
mir998	transcription_initiation_from_RNA_polymerase_II_promoter	67	3.03964	1.70345	0	1	1
mir998	germ-line_cyst_formation	20	0.907356	0.930694	0	1	1
mir998	chromatin_silencing	38	1.72398	1.28287	2	0.519333	1
mir998	cellular_respiration	31	1.4064	1.1587	2	0.413613	1
mir998	regulation_of_protein_kinase_activity	49	2.22302	1.45677	1	0.897206	1
mir998	protein_complex_disassembly	28	1.2703	1.10121	2	0.364829	1
mir998	courtship_behavior	42	1.90545	1.3487	2	0.573757	1
mir998	antennal_development	21	0.952724	0.953678	1	0.622812	1
mir998	regulation_of_gene_expression,_epigenetic	101	4.58215	2.09147	5	0.485951	1
mir998	molting_cycle,_chitin-based_cuticle	43	1.95082	1.36467	1	0.864184	1
mir998	germarium-derived_oocyte_fate_determination	23	1.04346	0.998058	1	0.65626	1
mir998	nuclear-transcribed_mRNA_catabolic_process	22	0.998092	0.97612	1	0.639924	1
mir998	DNA-dependent_DNA_replication	58	2.63133	1.58491	1	0.932315	1
mir998	molting_cycle_process	26	1.17956	1.06115	1	0.700954	1
mir998	response_to_fungus	31	1.4064	1.1587	2	0.413613	1
mir998	phototransduction	45	2.04155	1.39604	0	1	1
mir998	nitrogen_compound_biosynthetic_process	45	2.04155	1.39604	2	0.611532	1
mir998	phospholipid_biosynthetic_process	41	1.86008	1.33255	1	0.850968	1
mir998	calcium-dependent_cell-cell_adhesion	21	0.952724	0.953678	1	0.622812	1
mir998	genital_disc_development	27	1.22493	1.08137	1	0.714521	1
mir998	phospholipid_metabolic_process	76	3.44795	1.81426	4	0.454346	1
mir998	posttranscriptional_gene_silencing_by_RNA	35	1.58787	1.23119	2	0.475569	1
mir998	ATP_biosynthetic_process	89	4.03773	1.9633	5	0.378673	1
mir998	antibacterial_humoral_response	41	1.86008	1.33255	2	0.560583	1
mir998	GPI_anchor_metabolic_process	23	1.04346	0.998058	0	1	1
mir998	single_fertilization	20	0.907356	0.930694	1	0.604887	1
mir998	ribonucleoside_triphosphate_biosynthetic_process	94	4.26457	2.0177	5	0.423877	1
mir998	ribonucleoside_monophosphate_metabolic_process	21	0.952724	0.953678	0	1	1
mir998	organic_acid_biosynthetic_process	28	1.2703	1.10121	1	0.727473	1
mir998	sensory_perception_of_taste	64	2.90354	1.66488	3	0.559709	1
mir998	oocyte_dorsal/ventral_axis_determination	34	1.54251	1.21348	2	0.460448	1
mir998	negative_regulation_of_cell_proliferation	28	1.2703	1.10121	2	0.364829	1
mir998	sex_determination	25	1.1342	1.04055	0	1	1
mir998	regulation_of_catalytic_activity	120	5.44414	2.27973	4	0.798453	1
mir998	regulation_of_kinase_activity	49	2.22302	1.45677	1	0.897206	1
mir998	centrosome_cycle	41	1.86008	1.33255	0	1	1
mir998	DNA_replication	98	4.44604	2.06018	4	0.654292	1
mir998	nucleoside_triphosphate_biosynthetic_process	94	4.26457	2.0177	5	0.423877	1
mir998	transmembrane_ion_transport	69	3.13038	1.72869	4	0.382597	1
mir998	purine_nucleotide_biosynthetic_process	115	5.2173	2.23173	5	0.601516	1
mir998	fertilization	21	0.952724	0.953678	1	0.622812	1
mir998	negative_regulation_of_cellular_component_organization_and_biogenesis	41	1.86008	1.33255	1	0.850968	1
mir998	protein_processing	35	1.58787	1.23119	1	0.803092	1
mir998	reproductive_behavior_in_a_multicellular_organism	49	2.22302	1.45677	1	0.897206	1
mir998	amino_acid_derivative_metabolic_process	51	2.31376	1.4862	1	0.906322	1
mir998	reproductive_process_in_a_multicellular_organism	57	2.58596	1.57119	2	0.737036	1
mir998	dsRNA_transport	26	1.17956	1.06115	0	1	1
mir998	phosphoinositide-mediated_signaling	24	1.08883	1.01952	1	0.671855	1
mir998	mitochondrial_transport	47	2.13229	1.42673	3	0.359871	1
mir998	amino_acid_biosynthetic_process	28	1.2703	1.10121	1	0.727473	1
mir998	aerobic_respiration	30	1.36103	1.13986	2	0.397548	1
mir998	Golgi_vesicle_transport	41	1.86008	1.33255	1	0.850968	1
mir998	detection_of_visible_light	50	2.26839	1.47156	1	0.90187	1
mir998	eggshell_chorion_formation	55	2.49523	1.54338	3	0.457906	1
mir998	nitrogen_compound_catabolic_process	35	1.58787	1.23119	2	0.475569	1
mir998	pigmentation_during_development	57	2.58596	1.57119	3	0.481464	1
mir998	regulation_of_Notch_signaling_pathway	24	1.08883	1.01952	1	0.671855	1
mir998	synaptic_vesicle_docking_during_exocytosis	23	1.04346	0.998058	0	1	1
mir998	ribonucleotide_metabolic_process	119	5.39877	2.27021	5	0.631702	1
mir998	purine_nucleotide_metabolic_process	117	5.30803	2.25105	5	0.616784	1
mir998	interphase_of_mitotic_cell_cycle	37	1.67861	1.26588	2	0.505018	1
mir998	spermatid_development	51	2.31376	1.4862	3	0.409514	1
mir998	polysaccharide_metabolic_process	111	5.03583	2.19257	4	0.746494	1
mir998	neuromuscular_junction_development	38	1.72398	1.28287	1	0.828695	1
mir998	tRNA_aminoacylation_for_protein_translation	59	2.6767	1.59852	2	0.754213	1
mir998	protein-DNA_complex_assembly	120	5.44414	2.27973	3	0.913142	1
mir998	induction_of_apoptosis	24	1.08883	1.01952	1	0.671855	1
mir998	sensory_perception_of_smell	70	3.17575	1.74117	0	1	1
mir998	sex_differentiation	58	2.63133	1.58491	3	0.493059	1
mir998	amino_acid_catabolic_process	32	1.45177	1.17725	2	0.429459	1
mir998	locomotor_rhythm	27	1.22493	1.08137	2	0.34821	1
mir998	transcription_initiation	75	3.40259	1.80228	2	0.859693	1
mir998	membrane_lipid_biosynthetic_process	46	2.08692	1.41147	3	0.34734	1
mir998	neuroblast_fate_commitment	27	1.22493	1.08137	2	0.34821	1
mir998	purine_ribonucleoside_triphosphate_metabolic_process	94	4.26457	2.0177	5	0.423877	1
mir998	RNA_modification	30	1.36103	1.13986	2	0.397548	1
mir998	establishment_of_RNA_localization	55	2.49523	1.54338	2	0.718842	1
mir998	establishment_and/or_maintenance_of_cytoskeleton_polarity	28	1.2703	1.10121	2	0.364829	1
mir998	methylation	53	2.40449	1.51506	0	1	1
mir998	di-,_tri-valent_inorganic_cation_transport	38	1.72398	1.28287	1	0.828695	1
mir998	DNA_packaging	95	4.30994	2.0284	2	0.933019	1
mir998	ribosome_biogenesis	54	2.44986	1.52929	2	0.709354	1
mir998	RNA_transport	54	2.44986	1.52929	2	0.709354	1
mir998	spindle_elongation	80	3.62942	1.86139	3	0.70903	1
mir998	glycerophospholipid_biosynthetic_process	27	1.22493	1.08137	1	0.714521	1
mir998	negative_regulation_of_cellular_protein_metabolic_process	65	2.94891	1.67783	1	0.951096	1
mir998	development_of_primary_sexual_characteristics	35	1.58787	1.23119	2	0.475569	1
mir998	mitochondrial_electron_transport,_NADH_to_ubiquinone	33	1.49714	1.1955	0	1	1
mir998	amine_biosynthetic_process	44	1.99618	1.38044	1	0.870346	1
mir998	protein_amino_acid_alkylation	23	1.04346	0.998058	0	1	1
mir998	spermatid_differentiation	53	2.40449	1.51506	3	0.433903	1
mir998	RNA_localization	109	4.94509	2.17273	6	0.374147	1
mir998	homophilic_cell_adhesion	30	1.36103	1.13986	1	0.75164	1
mir998	nucleic_acid_transport	54	2.44986	1.52929	2	0.709354	1
mir998	protein_targeting_to_membrane	20	0.907356	0.930694	0	1	1
mir998	purine_ribonucleotide_metabolic_process	114	5.17193	2.222	5	0.593753	1
mir998	response_to_bacterium	75	3.40259	1.80228	2	0.859693	1
mir998	positive_regulation_of_protein_kinase_activity	23	1.04346	0.998058	1	0.65626	1
mir998	Malpighian_tubule_morphogenesis	24	1.08883	1.01952	1	0.671855	1
mir998	purine_nucleoside_triphosphate_metabolic_process	94	4.26457	2.0177	5	0.423877	1
mir998	regulation_of_protein_modification_process	29	1.31567	1.1207	1	0.739837	1
mir998	spermatogenesis	116	5.26267	2.24141	6	0.431071	1
mir998	mitotic_spindle_elongation	79	3.58406	1.84972	3	0.700971	1
mir998	negative_regulation_of_protein_metabolic_process	66	2.99428	1.69069	1	0.953315	1
mir998	cilium_biogenesis	32	1.45177	1.17725	2	0.429459	1
mir998	imaginal_disc-derived_wing_hair_organization_and_biogenesis	36	1.63324	1.24866	2	0.490428	1
mir998	detection_of_abiotic_stimulus	55	2.49523	1.54338	1	0.922199	1
mir998	hindgut_morphogenesis	39	1.76934	1.29964	2	0.533368	1
mir998	respiratory_electron_transport_chain	71	3.22111	1.75356	1	0.962986	1
mir998	cellular_lipid_catabolic_process	27	1.22493	1.08137	2	0.34821	1
mir998	proton_transport	75	3.40259	1.80228	4	0.444238	1
mir998	membrane_docking	29	1.31567	1.1207	1	0.739837	1
mir998	one-carbon_compound_metabolic_process	69	3.13038	1.72869	0	1	1
mir998	protein_folding	96	4.35531	2.03905	3	0.816093	1
mir998	actin_polymerization_and/or_depolymerization	25	1.1342	1.04055	0	1	1
mir998	protein_amino_acid_lipidation	29	1.31567	1.1207	1	0.739837	1
mir998	centrosome_organization_and_biogenesis	50	2.26839	1.47156	0	1	1
mir998	cytokinesis_during_cell_cycle	25	1.1342	1.04055	0	1	1
mir998	behavioral_interaction_between_organisms	59	2.6767	1.59852	2	0.754213	1
mir998	covalent_chromatin_modification	50	2.26839	1.47156	1	0.90187	1
mir998	neuroblast_differentiation	28	1.2703	1.10121	2	0.364829	1
mir998	regulation_of_synapse_organization_and_biogenesis	28	1.2703	1.10121	2	0.364829	1
mir998	regulation_of_mitotic_cell_cycle	88	3.99237	1.95224	4	0.569555	1
mir998	biopolymer_methylation	41	1.86008	1.33255	0	1	1
mir998	amine_catabolic_process	35	1.58787	1.23119	2	0.475569	1
mir998	non-sensory_hair_organization_and_biogenesis	37	1.67861	1.26588	2	0.505018	1
mir998	regulation_of_cell_proliferation	48	2.17765	1.44182	3	0.372365	1
mir998	karyosome_formation	21	0.952724	0.953678	1	0.622812	1
mir998	vesicle_docking_during_exocytosis	29	1.31567	1.1207	1	0.739837	1
mir998	gene_silencing	76	3.44795	1.81426	4	0.454346	1
mir998	cellular_macromolecular_complex_disassembly	29	1.31567	1.1207	2	0.381281	1
mir998	carboxylic_acid_biosynthetic_process	28	1.2703	1.10121	1	0.727473	1
mir998	coenzyme_catabolic_process	30	1.36103	1.13986	2	0.397548	1
mir998	positive_regulation_of_kinase_activity	23	1.04346	0.998058	1	0.65626	1
mir998	detection_of_light_stimulus_involved_in_visual_perception	49	2.22302	1.45677	0	1	1
mir998	regulation_of_tube_size	24	1.08883	1.01952	1	0.671855	1
mir998	monocarboxylic_acid_metabolic_process	82	3.72016	1.88451	4	0.513525	1
mir998	regulation_of_cytoskeleton_organization_and_biogenesis	38	1.72398	1.28287	2	0.519333	1
mir998	hydrogen_transport	75	3.40259	1.80228	4	0.444238	1
mir998	alternative_nuclear_mRNA_splicing,_via_spliceosome	52	2.35913	1.5007	3	0.421752	1
mir998	organelle_ATP_synthesis_coupled_electron_transport	64	2.90354	1.66488	1	0.948772	1
mir998	reproductive_behavior	64	2.90354	1.66488	2	0.79296	1
mir998	negative_regulation_of_cellular_biosynthetic_process	36	1.63324	1.24866	1	0.812026	1
mir998	regulation_of_cell_fate_specification	20	0.907356	0.930694	1	0.604887	1
mir998	sensory_perception_of_light_stimulus	60	2.72207	1.61201	1	0.938317	1
mir998	regulation_of_transport	47	2.13229	1.42673	3	0.359871	1
mir998	tRNA_aminoacylation	59	2.6767	1.59852	2	0.754213	1
mir998	chromosome_condensation	33	1.49714	1.1955	0	1	1
mir998	establishment_and/or_maintenance_of_microtubule_cytoskeleton_polarity	28	1.2703	1.10121	2	0.364829	1
mir998	heterochromatin_formation	42	1.90545	1.3487	2	0.573757	1
mir998	ncRNA_processing	71	3.22111	1.75356	3	0.63036	1
mir998	positive_regulation_of_transferase_activity	23	1.04346	0.998058	1	0.65626	1
mir998	ribonucleoside_triphosphate_metabolic_process	95	4.30994	2.0284	5	0.432856	1
mir998	defense_response_to_Gram-positive_bacterium	26	1.17956	1.06115	1	0.700954	1
mir998	male_mating_behavior	28	1.2703	1.10121	0	1	1
mir998	oocyte_microtubule_cytoskeleton_organization	28	1.2703	1.10121	2	0.364829	1
mir998	regulation_of_synaptic_growth_at_neuromuscular_junction	21	0.952724	0.953678	1	0.622812	1
mir998	microtubule-based_movement	101	4.58215	2.09147	4	0.677404	1
mir998	regulation_of_actin_filament-based_process	24	1.08883	1.01952	1	0.671855	1
mir998	cell_redox_homeostasis	55	2.49523	1.54338	2	0.718842	1
mir998	response_to_toxin	22	0.998092	0.97612	0	1	1
mir998	regulation_of_mitosis	41	1.86008	1.33255	1	0.850968	1
mir998	regulation_of_cell_cycle_process	59	2.6767	1.59852	2	0.754213	1
mir998	tRNA_processing	33	1.49714	1.1955	2	0.445075	1
mir998	acetyl-CoA_catabolic_process	29	1.31567	1.1207	2	0.381281	1
mir998	purine_ribonucleotide_biosynthetic_process	113	5.12656	2.21223	5	0.585906	1
mir998	detection_of_light_stimulus_involved_in_sensory_perception	49	2.22302	1.45677	0	1	1
mir998	negative_regulation_of_programmed_cell_death	50	2.26839	1.47156	3	0.397197	1
mir998	ribonucleotide_biosynthetic_process	118	5.3534	2.26065	5	0.624288	1
mir998	visual_perception	60	2.72207	1.61201	1	0.938317	1
mir998	detection_of_chemical_stimulus	21	0.952724	0.953678	0	1	1
mir998	tricarboxylic_acid_cycle	29	1.31567	1.1207	2	0.381281	1
mir998	ATP_metabolic_process	90	4.0831	1.9743	5	0.387741	1
mir998	positive_regulation_of_apoptosis	30	1.36103	1.13986	1	0.75164	1
mir998	regulation_of_hydrolase_activity	58	2.63133	1.58491	3	0.493059	1
mir998	lipoprotein_metabolic_process	30	1.36103	1.13986	1	0.75164	1
mir998	regulation_of_transferase_activity	49	2.22302	1.45677	1	0.897206	1
mir998	glucosamine_metabolic_process	104	4.71825	2.12231	3	0.855733	1
mir998	synaptic_growth_at_neuromuscular_junction	25	1.1342	1.04055	1	0.686742	1
mir998	response_to_wounding	22	0.998092	0.97612	0	1	1
mir998	rRNA_processing	34	1.54251	1.21348	1	0.793734	1
mir998	RNA_catabolic_process	25	1.1342	1.04055	1	0.686742	1
mir998	positive_regulation_of_catalytic_activity	43	1.95082	1.36467	1	0.864184	1
mir998	regulation_of_alternative_nuclear_mRNA_splicing,_via_spliceosome	51	2.31376	1.4862	3	0.409514	1
mir998	purine_nucleoside_triphosphate_biosynthetic_process	93	4.21921	2.00694	5	0.414872	1
mir998	regulation_of_protein_kinase_cascade	36	1.63324	1.24866	2	0.490428	1
mir998	tRNA_metabolic_process	92	4.17384	1.99612	4	0.604828	1
mir998	regulation_of_actin_cytoskeleton_organization_and_biogenesis	24	1.08883	1.01952	1	0.671855	1
mir998	protein_amino_acid_methylation	23	1.04346	0.998058	0	1	1
mir998	second-messenger-mediated_signaling	40	1.81471	1.3162	1	0.843886	1
mir998	hair_cell_differentiation	37	1.67861	1.26588	2	0.505018	1
mir998	GPI_anchor_biosynthetic_process	21	0.952724	0.953678	0	1	1
mir998	reproductive_structure_development	29	1.31567	1.1207	1	0.739837	1
mir998	cyclic_nucleotide_biosynthetic_process	25	1.1342	1.04055	1	0.686742	1
mir998	secondary_metabolic_process	81	3.67479	1.87299	4	0.503859	1
mir998	cytoskeleton-dependent_intracellular_transport	104	4.71825	2.12231	4	0.699416	1
mir998	defense_response_to_Gram-negative_bacterium	31	1.4064	1.1587	1	0.762907	1
mir998	regulation_of_organelle_organization_and_biogenesis	53	2.40449	1.51506	3	0.433903	1
mir998	compound_eye_photoreceptor_cell_differentiation	114	5.17193	2.222	23	1.650153503022715E-9	1.1683086801400823E-6
mir998	compound_eye_photoreceptor_fate_commitment	48	2.17765	1.44182	13	1.4845797030356135E-7	3.503608099164048E-5
mir998	eye_photoreceptor_cell_fate_commitment	48	2.17765	1.44182	13	1.4845797030356135E-7	3.503608099164048E-5
mir998	photoreceptor_cell_fate_commitment	50	2.26839	1.47156	13	2.507353131852795E-7	4.438015043379447E-5
mir998	eye_photoreceptor_cell_differentiation	117	5.30803	2.25105	23	2.8058160023922275E-9	9.932588648468484E-7
Only_miR11	regulation_of_cell_differentiation	85	6.53001	2.45527	19	1.9857691908577728E-5	0.00100423
Only_miR11	morphogenesis_of_embryonic_epithelium	102	7.83601	2.68961	21	2.814844898015906E-5	0.00132861
Only_miR11	antimicrobial_humoral_response	88	6.76048	2.49822	19	3.326501294908499E-5	0.00147198
Only_miR11	induction_of_apoptosis	24	1.84377	1.30465	9	4.1861857310928037E-5	0.00174342
Only_miR11	cation_homeostasis	30	2.30471	1.45865	10	5.105109747764174E-5	0.00200801
Only_miR11	positive_regulation_of_apoptosis	30	2.30471	1.45865	10	5.105109747764174E-5	0.00200801
Only_miR11	transforming_growth_factor_beta_receptor_signaling_pathway	36	2.76565	1.59787	11	5.3947579908291475E-5	0.00201026
Only_miR11	regulation_of_apoptosis	86	6.60683	2.46967	18	8.143822217362026E-5	0.00288291
Only_miR11	transmembrane_receptor_protein_serine/threonine_kinase_signaling_pathway	38	2.9193	1.64165	11	9.358308221762797E-5	0.00315509
Only_miR11	humoral_immune_response	95	7.29825	2.59568	19	9.993138166993137E-5	0.00321597
Only_miR11	female_meiosis	59	4.53259	2.04558	14	1.2013133057865431E-4	0.00369796
Only_miR11	positive_regulation_of_developmental_process	59	4.53259	2.04558	14	1.2013133057865431E-4	0.00369796
Only_miR11	detection_of_external_stimulus	60	4.60942	2.06284	14	1.45669916790968E-4	0.00412537
Only_miR11	cellularization	67	5.14718	2.17985	15	1.4087916855541773E-4	0.00415594
Only_miR11	negative_regulation_of_cell_proliferation	28	2.15106	1.40919	9	1.6669949460617437E-4	0.00453936
Only_miR11	dorsal_closure	85	6.53001	2.45527	17	2.267603980175406E-4	0.00594616
Only_miR11	positive_regulation_of_catalytic_activity	43	3.30342	1.74632	11	3.125907144725688E-4	0.00763153
Only_miR11	negative_regulation_of_signal_transduction	95	7.29825	2.59568	18	3.0489182191067353E-4	0.00770941
Only_miR11	di-,_tri-valent_inorganic_cation_transport	38	2.9193	1.64165	10	4.546072149888033E-4	0.0107287
Only_miR11	eye_photoreceptor_cell_differentiation	117	8.98837	2.8806	20	5.951415721272997E-4	0.0135923
Only_miR11	transmembrane_receptor_protein_tyrosine_kinase_signaling_pathway	117	8.98837	2.8806	20	5.951415721272997E-4	0.0135923
Only_miR11	torso_signaling_pathway	33	2.53518	1.52984	9	6.548288008303705E-4	0.0144881
Only_miR11	hemopoiesis	54	4.14848	1.95698	12	6.828772031117543E-4	0.0146508
Only_miR11	midgut_development	27	2.07424	1.38379	8	7.112273730837621E-4	0.0148103
Only_miR11	brain_development	94	7.22142	2.58198	17	7.715606056592175E-4	0.0156076
Only_miR11	hemocyte_differentiation	34	2.612	1.55285	9	8.302532843061129E-4	0.015887
Only_miR11	detection_of_abiotic_stimulus	55	4.2253	1.97502	12	8.129525904313579E-4	0.0159881
Only_miR11	regulation_of_cell_proliferation	48	3.68753	1.84506	11	8.59226265526587E-4	0.0160087
Only_miR11	actin_filament_organization	79	6.06907	2.36703	15	9.146592565904684E-4	0.0161895
Only_miR11	regulation_of_cellular_biosynthetic_process	87	6.68366	2.48399	16	9.011265469284586E-4	0.0163589
Only_miR11	head_segmentation	22	1.69012	1.24911	7	9.570787791538827E-4	0.0165271
Only_miR11	regulation_of_hemocyte_differentiation	22	1.69012	1.24911	7	9.570787791538827E-4	0.0165271
Only_miR11	embryonic_axis_specification	64	4.91671	2.13049	13	0.00102381	0.0172585
Only_miR11	compound_eye_photoreceptor_cell_differentiation	114	8.75789	2.84343	19	0.00110157	0.0181374
Only_miR11	morphogenesis_of_a_polarized_epithelium	73	5.60813	2.27537	14	0.00120737	0.0185829
Only_miR11	developmental_programmed_cell_death	29	2.22789	1.43413	8	0.00119714	0.018835
Only_miR11	detection_of_stimulus	81	6.22271	2.3968	15	0.00119453	0.0192211
Only_miR11	retinal_cell_programmed_cell_death	23	1.76694	1.27718	7	0.00128505	0.0193577
Only_miR11	sperm_individualization	23	1.76694	1.27718	7	0.00128505	0.0193577
Only_miR11	response_to_steroid_hormone_stimulus	23	1.76694	1.27718	7	0.00128505	0.0193577
Only_miR11	response_to_ecdysone	23	1.76694	1.27718	7	0.00128505	0.0193577
Only_miR11	hemopoietic_or_lymphoid_organ_development	66	5.07036	2.16352	13	0.00137985	0.0203528
Only_miR11	immune_system_development	66	5.07036	2.16352	13	0.00137985	0.0203528
Only_miR11	head_involution	37	2.84247	1.61991	9	0.00159628	0.0221602
Only_miR11	tissue_death	75	5.76177	2.30632	14	0.00158424	0.0224328
Only_miR11	histolysis	75	5.76177	2.30632	14	0.00158424	0.0224328
Only_miR11	response_to_bacterium	75	5.76177	2.30632	14	0.00158424	0.0224328
Only_miR11	organ_formation	44	3.38024	1.76651	10	0.00156102	0.0225552
Only_miR11	formation_of_organ_boundary	44	3.38024	1.76651	10	0.00156102	0.0225552
Only_miR11	regulation_of_antimicrobial_peptide_biosynthetic_process	24	1.84377	1.30465	7	0.00169468	0.0230738
Only_miR11	positive_regulation_of_antimicrobial_peptide_biosynthetic_process	24	1.84377	1.30465	7	0.00169468	0.0230738
Only_miR11	antimicrobial_peptide_biosynthetic_process	24	1.84377	1.30465	7	0.00169468	0.0230738
Only_miR11	antimicrobial_peptide_production	24	1.84377	1.30465	7	0.00169468	0.0230738
Only_miR11	production_of_molecular_mediator_of_immune_response	24	1.84377	1.30465	7	0.00169468	0.0230738
Only_miR11	detection_of_stimulus_involved_in_sensory_perception	68	5.22401	2.19606	13	0.00183306	0.0244869
Only_miR11	gut_development	68	5.22401	2.19606	13	0.00183306	0.0244869
Only_miR11	ovarian_nurse_cell_to_oocyte_transport	38	2.9193	1.64165	9	0.00195059	0.0255745
Only_miR11	response_to_hormone_stimulus	25	1.92059	1.33156	7	0.0021989	0.0283059
Only_miR11	peptide_biosynthetic_process	25	1.92059	1.33156	7	0.0021989	0.0283059
Only_miR11	ectoderm_development	70	5.37765	2.22812	13	0.00240251	0.0303746
Only_miR11	ion_homeostasis	47	3.61071	1.82574	10	0.00263724	0.0327572
Only_miR11	cellular_cation_homeostasis	26	1.99741	1.35793	7	0.00281138	0.0337366
Only_miR11	response_to_endogenous_stimulus	26	1.99741	1.35793	7	0.00281138	0.0337366
Only_miR11	tripartite_regional_subdivision	55	4.2253	1.97502	11	0.00276682	0.0337743
Only_miR11	determination_of_anterior/posterior_axis,_embryo	55	4.2253	1.97502	11	0.00276682	0.0337743
Only_miR11	positive_regulation_of_cellular_biosynthetic_process	33	2.53518	1.52984	8	0.0029383	0.0346719
Only_miR11	regulation_of_cell_fate_specification	20	1.53647	1.19098	6	0.00310098	0.0359917
Only_miR11	establishment_and/or_maintenance_of_cell_polarity	107	8.22013	2.75475	17	0.00328709	0.0375365
Only_miR11	autophagic_cell_death	73	5.60813	2.27537	13	0.00352144	0.0395743
Only_miR11	salivary_gland_histolysis	73	5.60813	2.27537	13	0.00352144	0.0395743
Only_miR11	salivary_gland_cell_autophagic_cell_death	73	5.60813	2.27537	13	0.00352144	0.0395743
Only_miR11	detection_of_light_stimulus_involved_in_visual_perception	49	3.76436	1.86418	10	0.00363677	0.0396128
Only_miR11	detection_of_light_stimulus_involved_in_sensory_perception	49	3.76436	1.86418	10	0.00363677	0.0396128
Only_miR11	regulation_of_proteolysis	34	2.612	1.55285	8	0.00358693	0.0396804
Only_miR11	asymmetric_protein_localization	34	2.612	1.55285	8	0.00358693	0.0396804
Only_miR11	membrane_lipid_metabolic_process	91	6.99095	2.54045	15	0.00389588	0.0417922
Only_miR11	adult_locomotory_behavior	42	3.22659	1.7259	9	0.00403829	0.0426733
Only_miR11	detection_of_light_stimulus	50	3.84118	1.88311	10	0.00423798	0.0434854
Only_miR11	detection_of_visible_light	50	3.84118	1.88311	10	0.00423798	0.0434854
Only_miR11	protein_kinase_cascade	83	6.37636	2.42621	14	0.00419747	0.0437031
Only_miR11	Wnt_receptor_signaling_pathway	75	5.76177	2.30632	13	0.00447837	0.0446575
Only_miR11	zygotic_determination_of_anterior/posterior_axis,_embryo	28	2.15106	1.40919	7	0.0044189	0.0446941
Only_miR11	neuroblast_differentiation	28	2.15106	1.40919	7	0.0044189	0.0446941
Only_miR11	regulation_of_cell_morphogenesis	111	8.52742	2.80576	17	0.00482465	0.0474424
Only_miR11	sensory_perception_of_light_stimulus	60	4.60942	2.06284	11	0.00556489	0.0539718
Only_miR11	chemical_homeostasis	60	4.60942	2.06284	11	0.00556489	0.0539718
Only_miR11	visual_perception	60	4.60942	2.06284	11	0.00556489	0.0539718
Only_miR11	chemosensory_behavior	86	6.60683	2.46967	14	0.00580622	0.0548107
Only_miR11	dephosphorylation	113	8.68107	2.83093	17	0.00578942	0.0553907
Only_miR11	immune_effector_process	37	2.84247	1.61991	8	0.00620831	0.0578353
Only_miR11	calcium_ion_transport	30	2.30471	1.45865	7	0.00663724	0.0580144
Only_miR11	spermatid_differentiation	53	4.07165	1.93878	10	0.00652071	0.0584387
Only_miR11	positive_regulation_of_protein_kinase_activity	23	1.76694	1.27718	6	0.0066172	0.0585622
Only_miR11	positive_regulation_of_kinase_activity	23	1.76694	1.27718	6	0.0066172	0.0585622
Only_miR11	cellular_di-,_tri-valent_inorganic_cation_homeostasis	23	1.76694	1.27718	6	0.0066172	0.0585622
Only_miR11	positive_regulation_of_transferase_activity	23	1.76694	1.27718	6	0.0066172	0.0585622
Only_miR11	phototransduction	45	3.45706	1.78647	9	0.00651788	0.0591623
Only_miR11	protein_amino_acid_dephosphorylation	87	6.68366	2.48399	14	0.00644069	0.0592209
Only_miR11	M_phase_of_meiotic_cell_cycle	116	8.91154	2.86826	17	0.00752483	0.0641877
Only_miR11	meiosis	116	8.91154	2.86826	17	0.00752483	0.0641877
Only_miR11	innate_immune_response	54	4.14848	1.95698	10	0.00746268	0.0644338
Only_miR11	synaptic_vesicle_transport	89	6.8373	2.51238	14	0.00787523	0.0655961
Only_miR11	peripheral_nervous_system_development	80	6.14589	2.38196	13	0.00780119	0.0657529
Only_miR11	establishment_of_planar_polarity	63	4.83989	2.11378	11	0.00809476	0.0658746
Only_miR11	establishment_of_tissue_polarity	63	4.83989	2.11378	11	0.00809476	0.0658746
Only_miR11	peptide_metabolic_process	31	2.38153	1.48276	7	0.00801419	0.0659773
Only_miR11	phosphoinositide-mediated_signaling	24	1.84377	1.30465	6	0.00825803	0.0664396
Only_miR11	di-,_tri-valent_inorganic_cation_homeostasis	24	1.84377	1.30465	6	0.00825803	0.0664396
Only_miR11	carbohydrate_biosynthetic_process	55	4.2253	1.97502	10	0.0085062	0.0676673
Only_miR11	negative_regulation_of_transcription_from_RNA_polymerase_II_promoter	55	4.2253	1.97502	10	0.0085062	0.0676673
Only_miR11	Toll_signaling_pathway	39	2.99612	1.66311	8	0.00862855	0.0678779
Only_miR11	anterior/posterior_axis_specification	118	9.06519	2.89288	17	0.00889794	0.0692279
Only_miR11	negative_regulation_of_cell_differentiation	56	4.30212	1.99289	10	0.00965804	0.071228
Only_miR11	secretion_by_cell	119	9.14201	2.90511	17	0.00965576	0.0719609
Only_miR11	olfactory_behavior	82	6.29954	2.41155	13	0.00957769	0.0721383
Only_miR11	positive_regulation_of_macromolecule_biosynthetic_process	100	7.68236	2.66311	15	0.00941009	0.0724168
Only_miR11	positive_regulation_of_transcription	91	6.99095	2.54045	14	0.00955177	0.0727167
Only_miR11	neuroblast_fate_determination	25	1.92059	1.33156	6	0.0101714	0.0734835
Only_miR11	second-messenger-mediated_signaling	40	3.07295	1.6843	8	0.0100742	0.073531
Only_miR11	positive_regulation_of_gene_expression	92	7.06777	2.55437	14	0.0104889	0.0750118
Only_miR11	regulation_of_protein_kinase_activity	49	3.76436	1.86418	9	0.0114627	0.0811561
Only_miR11	regulation_of_kinase_activity	49	3.76436	1.86418	9	0.0114627	0.0811561
Only_miR11	regulation_of_transferase_activity	49	3.76436	1.86418	9	0.0114627	0.0811561
Only_miR11	antibacterial_humoral_response	41	3.14977	1.70523	8	0.0116918	0.0819584
Only_miR11	protein_ubiquitination	41	3.14977	1.70523	8	0.0116918	0.0819584
Only_miR11	imaginal_disc_pattern_formation	94	7.22142	2.58198	14	0.0125778	0.0873046
Only_miR11	regulation_of_growth	94	7.22142	2.58198	14	0.0125778	0.0873046
Only_miR11	positive_regulation_of_nucleobase,_nucleoside,_nucleotide_and_nucleic_acid_metabolic_process	94	7.22142	2.58198	14	0.0125778	0.0873046
Only_miR11	positive_regulation_of_transcription,_DNA-dependent	67	5.14718	2.17985	11	0.0127568	0.0876878
Only_miR11	phospholipid_metabolic_process	76	5.8386	2.32165	12	0.0128971	0.0877992
Only_miR11	circadian_rhythm	59	4.53259	2.04558	10	0.0138317	0.0932652
Only_miR11	defense_response_to_bacterium	68	5.22401	2.19606	11	0.0141894	0.0947745
Only_miR11	positive_regulation_of_RNA_metabolic_process	68	5.22401	2.19606	11	0.0141894	0.0947745
Only_miR11	neuroblast_fate_commitment	27	2.07424	1.38379	6	0.0149032	0.0976986
Only_miR11	bristle_development	51	3.91801	1.90184	9	0.0147916	0.0978734
Only_miR11	regulation_of_photoreceptor_cell_differentiation	20	1.53647	1.19098	5	0.015609	0.0995601
Only_miR11	positive_regulation_of_signal_transduction	43	3.30342	1.74632	8	0.0154876	0.0996839
Only_miR11	regulation_of_neurogenesis	43	3.30342	1.74632	8	0.0154876	0.0996839
Only_miR11	rhythmic_process	60	4.60942	2.06284	10	0.0154851	0.100582
Only_miR11	photoreceptor_cell_morphogenesis	60	4.60942	2.06284	10	0.0154851	0.100582
Only_miR11	ovarian_follicle_cell_migration	60	4.60942	2.06284	10	0.0154851	0.100582
Only_miR11	negative_regulation_of_transcription,_DNA-dependent	116	8.91154	2.86826	16	0.0161618	0.102165
Only_miR11	developmental_growth	79	6.06907	2.36703	12	0.0172342	0.10798
Only_miR11	cyclic_nucleotide_metabolic_process	28	2.15106	1.40919	6	0.0177625	0.109355
Only_miR11	imaginal_disc-derived_wing_vein_specification	28	2.15106	1.40919	6	0.0177625	0.109355
Only_miR11	regulation_of_Wnt_receptor_signaling_pathway	28	2.15106	1.40919	6	0.0177625	0.109355
Only_miR11	protein_modification_by_small_protein_conjugation	44	3.38024	1.76651	8	0.0176874	0.109848
Only_miR11	positive_regulation_of_macromolecule_metabolic_process	108	8.29695	2.76759	15	0.0183364	0.110959
Only_miR11	synaptic_vesicle_endocytosis	36	2.76565	1.59787	7	0.0181914	0.111031
Only_miR11	methylation	53	4.07165	1.93878	9	0.0187821	0.112693
Only_miR11	regulation_of_organelle_organization_and_biogenesis	53	4.07165	1.93878	9	0.0187821	0.112693
Only_miR11	terminal_region_determination	21	1.6133	1.22039	5	0.0192175	0.114336
Only_miR11	establishment_of_ommatidial_polarity	45	3.45706	1.78647	8	0.0201025	0.118605
Only_miR11	olfactory_learning	45	3.45706	1.78647	8	0.0201025	0.118605
Only_miR11	border_follicle_cell_migration	54	4.14848	1.95698	9	0.021046	0.122136
Only_miR11	dorsal/ventral_pattern_formation,_imaginal_disc	54	4.14848	1.95698	9	0.021046	0.122136
Only_miR11	exocytosis	63	4.83989	2.11378	10	0.0213256	0.122752
Only_miR11	amine_transport	37	2.84247	1.61991	7	0.0209875	0.122803
Only_miR11	regulation_of_catalytic_activity	120	9.21884	2.9173	16	0.0216714	0.123737
Only_miR11	salivary_gland_boundary_specification	22	1.69012	1.24911	5	0.0233325	0.131107
Only_miR11	establishment_and/or_maintenance_of_epithelial_cell_apical/basal_polarity	22	1.69012	1.24911	5	0.0233325	0.131107
Only_miR11	sensory_organ_boundary_specification	22	1.69012	1.24911	5	0.0233325	0.131107
Only_miR11	photoreceptor_cell_development	64	4.91671	2.13049	10	0.0235875	0.131496
Only_miR11	learning_and/or_memory	73	5.60813	2.27537	11	0.0232312	0.131582
Only_miR11	establishment_and/or_maintenance_of_apical/basal_cell_polarity	30	2.30471	1.45865	6	0.0245608	0.135852
Only_miR11	biopolymer_glycosylation	47	3.61071	1.82574	8	0.0256175	0.140599
Only_miR11	protein_amino_acid_glycosylation	47	3.61071	1.82574	8	0.0256175	0.140599
Only_miR11	glycerophospholipid_metabolic_process	47	3.61071	1.82574	8	0.0256175	0.140599
Only_miR11	compound_eye_photoreceptor_development	56	4.30212	1.99289	9	0.02615	0.142417
Only_miR11	regulation_of_G-protein_coupled_receptor_protein_signaling_pathway	23	1.76694	1.27718	5	0.0279757	0.151197
Only_miR11	endosome_transport	23	1.76694	1.27718	5	0.0279757	0.151197
Only_miR11	protein_amino_acid_alkylation	23	1.76694	1.27718	5	0.0279757	0.151197
Only_miR11	protein_amino_acid_methylation	23	1.76694	1.27718	5	0.0279757	0.151197
Only_miR11	neurotransmitter_secretion	104	7.98966	2.71585	14	0.0281937	0.151221
Only_miR11	adult_behavior	66	5.07036	2.16352	10	0.028621	0.151222
Only_miR11	regulation_of_localization	85	6.53001	2.45527	12	0.0290671	0.15132
Only_miR11	female_meiosis_chromosome_segregation	31	2.38153	1.48276	6	0.0285319	0.151884
Only_miR11	defense_response_to_Gram-negative_bacterium	31	2.38153	1.48276	6	0.0285319	0.151884
Only_miR11	eye_photoreceptor_cell_development	57	4.37895	2.01061	9	0.0290047	0.152113
Only_miR11	leg_morphogenesis	40	3.07295	1.6843	7	0.0311307	0.16088
Only_miR11	smoothened_signaling_pathway	40	3.07295	1.6843	7	0.0311307	0.16088
Only_miR11	wing_disc_pattern_formation	67	5.14718	2.17985	10	0.0314042	0.161117
Only_miR11	learning	49	3.76436	1.86418	8	0.0321064	0.163535
Only_miR11	glycoprotein_biosynthetic_process	49	3.76436	1.86418	8	0.0321064	0.163535
Only_miR11	generation_of_a_signal_involved_in_cell-cell_signaling	106	8.14331	2.74184	14	0.0325378	0.164548
Only_miR11	regulation_of_organ_growth	32	2.45836	1.50648	6	0.0329031	0.165215
Only_miR11	regulation_of_actin_filament-based_process	24	1.84377	1.30465	5	0.0331645	0.165356
Only_miR11	regulation_of_actin_cytoskeleton_organization_and_biogenesis	24	1.84377	1.30465	5	0.0331645	0.165356
Only_miR11	regulation_of_translation	59	4.53259	2.04558	9	0.0353532	0.17382
Only_miR11	potassium_ion_transport	41	3.14977	1.70523	7	0.0351328	0.173944
Only_miR11	limb_morphogenesis	41	3.14977	1.70523	7	0.0351328	0.173944
Only_miR11	biopolymer_methylation	41	3.14977	1.70523	7	0.0351328	0.173944
Only_miR11	limb_development	41	3.14977	1.70523	7	0.0351328	0.173944
Only_miR11	glycoprotein_metabolic_process	50	3.84118	1.88311	8	0.0357364	0.174492
Only_miR11	regulation_of_neurotransmitter_levels	118	9.06519	2.89288	15	0.0371765	0.18028
Only_miR11	R7_cell_differentiation	33	2.53518	1.52984	6	0.0376856	0.181506
Only_miR11	sex_determination	25	1.92059	1.33156	5	0.0389128	0.184901
Only_miR11	cyclic_nucleotide_biosynthetic_process	25	1.92059	1.33156	5	0.0389128	0.184901
Only_miR11	spermatid_development	51	3.91801	1.90184	8	0.0396331	0.185829
Only_miR11	sodium_ion_transport	60	4.60942	2.06284	9	0.0388594	0.185895
Only_miR11	phosphoinositide_metabolic_process	42	3.22659	1.7259	7	0.0394609	0.186255
Only_miR11	imaginal_disc-derived_wing_margin_morphogenesis	34	2.612	1.55285	6	0.0428892	0.199774
Only_miR11	cellular_ion_homeostasis	43	3.30342	1.74632	7	0.0441224	0.204174
Only_miR11	epithelial_cell_migration,_open_tracheal_system	26	1.99741	1.35793	5	0.0452303	0.207942
Only_miR11	dsRNA_transport	26	1.99741	1.35793	5	0.0452303	0.207942
Only_miR11	epithelial_cell_migration	26	1.99741	1.35793	5	0.0452303	0.207942
Only_miR11	heart_development	72	5.5313	2.25973	10	0.0481898	0.220119
Only_miR11	amino_acid_transport	35	2.68883	1.57552	6	0.0485213	0.220212
Only_miR11	peptidyl-amino_acid_modification	44	3.38024	1.76651	7	0.0491236	0.221525
Only_miR11	bristle_morphogenesis	44	3.38024	1.76651	7	0.0491236	0.221525
Only_miR11	MAPKKK_cascade	63	4.83989	2.11378	9	0.0507686	0.227495
Only_miR11	morphogenesis_of_follicular_epithelium	27	2.07424	1.38379	5	0.0521228	0.232094
Only_miR11	genital_disc_development	27	2.07424	1.38379	5	0.0521228	0.232094
Only_miR11	carboxylic_acid_transport	45	3.45706	1.78647	7	0.0544695	0.241028
Only_miR11	organ_growth	45	3.45706	1.78647	7	0.0544695	0.241028
Only_miR11	organic_acid_transport	45	3.45706	1.78647	7	0.0544695	0.241028
Only_miR11	epidermal_growth_factor_receptor_signaling_pathway	45	3.45706	1.78647	7	0.0544695	0.241028
Only_miR11	establishment_of_RNA_localization	55	4.2253	1.97502	8	0.0580005	0.255058
Only_miR11	regulation_of_cell_shape	95	7.29825	2.59568	12	0.0602184	0.258392
Only_miR11	positive_regulation_of_transcription_from_RNA_polymerase_II_promoter	37	2.84247	1.61991	6	0.0610905	0.258994
Only_miR11	neuroblast_proliferation	37	2.84247	1.61991	6	0.0610905	0.258994
Only_miR11	regulation_of_multicellular_organismal_process	85	6.53001	2.45527	11	0.0607341	0.259034
Only_miR11	membrane_lipid_biosynthetic_process	46	3.53389	1.80621	7	0.0601641	0.259733
Only_miR11	male_gamete_generation	116	8.91154	2.86826	14	0.0616591	0.259849
Only_miR11	spermatogenesis	116	8.91154	2.86826	14	0.0616591	0.259849
Only_miR11	negative_regulation_of_cellular_protein_metabolic_process	65	4.99354	2.14707	9	0.0599091	0.260219
Only_miR11	amino_acid_biosynthetic_process	28	2.15106	1.40919	5	0.0595924	0.260441
Only_miR11	dorsal_appendage_formation	28	2.15106	1.40919	5	0.0595924	0.260441
Only_miR11	rhodopsin_mediated_signaling_pathway	20	1.53647	1.19098	4	0.0625798	0.262169
Only_miR11	germ-line_cyst_formation	20	1.53647	1.19098	4	0.0625798	0.262169
Only_miR11	gastrulation	66	5.07036	2.16352	9	0.0648493	0.270078
Only_miR11	negative_regulation_of_protein_metabolic_process	66	5.07036	2.16352	9	0.0648493	0.270078
Only_miR11	stress-activated_protein_kinase_signaling_pathway	47	3.61071	1.82574	7	0.0662098	0.274132
Only_miR11	regulation_of_transport	47	3.61071	1.82574	7	0.0662098	0.274132
Only_miR11	lipid_biosynthetic_process	107	8.22013	2.75475	13	0.0669612	0.275631
Only_miR11	protein_polymerization	29	2.22789	1.43413	5	0.0676375	0.276806
Only_miR11	regulation_of_protein_modification_process	29	2.22789	1.43413	5	0.0676375	0.276806
Only_miR11	imaginal_disc-derived_wing_vein_morphogenesis	29	2.22789	1.43413	5	0.0676375	0.276806
Only_miR11	morphogenesis_of_a_branching_structure	38	2.9193	1.64165	6	0.0680321	0.27682
Only_miR11	periodic_partitioning	38	2.9193	1.64165	6	0.0680321	0.27682
Only_miR11	regulation_of_cytoskeleton_organization_and_biogenesis	38	2.9193	1.64165	6	0.0680321	0.27682
Only_miR11	chromatin_modification	108	8.29695	2.76759	13	0.0710136	0.287301
Only_miR11	tube_development	108	8.29695	2.76759	13	0.0710136	0.287301
Only_miR11	tracheal_outgrowth,_open_tracheal_system	21	1.6133	1.22039	4	0.0727827	0.291131
Only_miR11	compound_eye_photoreceptor_fate_commitment	48	3.68753	1.84506	7	0.0726077	0.292081
Only_miR11	eye_photoreceptor_cell_fate_commitment	48	3.68753	1.84506	7	0.0726077	0.292081
Only_miR11	meiotic_chromosome_segregation	48	3.68753	1.84506	7	0.0726077	0.292081
Only_miR11	wing_disc_dorsal/ventral_pattern_formation	48	3.68753	1.84506	7	0.0726077	0.292081
Only_miR11	neuron_recognition	48	3.68753	1.84506	7	0.0726077	0.292081
Only_miR11	nucleobase,_nucleoside,_nucleotide_and_nucleic_acid_transport	58	4.45577	2.02817	8	0.0748038	0.297534
Only_miR11	cell_recognition	49	3.76436	1.86418	7	0.079358	0.313885
Only_miR11	one-carbon_compound_metabolic_process	69	5.30083	2.21215	9	0.0811722	0.317513
Only_miR11	germarium-derived_egg_chamber_formation	59	4.53259	2.04558	8	0.0809922	0.318569
Only_miR11	rhabdomere_development	22	1.69012	1.24911	4	0.0837716	0.325881
Only_miR11	response_to_toxin	22	1.69012	1.24911	4	0.0837716	0.325881
Only_miR11	response_to_wounding	22	1.69012	1.24911	4	0.0837716	0.325881
Only_miR11	cofactor_catabolic_process	31	2.38153	1.48276	5	0.08543	0.330516
Only_miR11	histone_modification	50	3.84118	1.88311	7	0.0864591	0.33268
Only_miR11	photoreceptor_cell_fate_commitment	50	3.84118	1.88311	7	0.0864591	0.33268
Only_miR11	leg_disc_development	50	3.84118	1.88311	7	0.0864591	0.33268
Only_miR11	covalent_chromatin_modification	50	3.84118	1.88311	7	0.0864591	0.33268
Only_miR11	cellular_chemical_homeostasis	50	3.84118	1.88311	7	0.0864591	0.33268
Only_miR11	oocyte_development	102	7.83601	2.68961	12	0.0918683	0.349692
Only_miR11	epidermis_morphogenesis	41	3.14977	1.70523	6	0.0914702	0.350059
Only_miR11	phospholipid_biosynthetic_process	41	3.14977	1.70523	6	0.0914702	0.350059
Only_miR11	negative_regulation_of_cellular_component_organization_and_biogenesis	41	3.14977	1.70523	6	0.0914702	0.350059
Only_miR11	Golgi_vesicle_transport	41	3.14977	1.70523	6	0.0914702	0.350059
Only_miR11	epidermis_development	51	3.91801	1.90184	7	0.0939087	0.353656
Only_miR11	cardiac_cell_differentiation	23	1.76694	1.27718	4	0.0955182	0.354067
Only_miR11	oocyte_differentiation	113	8.68107	2.83093	13	0.0936375	0.354521
Only_miR11	gastrulation_with_mouth_forming_first	32	2.45836	1.50648	5	0.0951572	0.354586
Only_miR11	gastrulation_involving_germ_band_extension	32	2.45836	1.50648	5	0.0951572	0.354586
Only_miR11	ventral_cord_development	32	2.45836	1.50648	5	0.0951572	0.354586
Only_miR11	tRNA_metabolic_process	92	7.06777	2.55437	11	0.0948072	0.355151
Only_miR11	monocarboxylic_acid_metabolic_process	82	6.29954	2.41155	10	0.0974964	0.359518
Only_miR11	tissue_morphogenesis	72	5.5313	2.25973	9	0.0997583	0.365953
Only_miR11	mesoderm_development	93	7.1446	2.56821	11	0.100454	0.366604
Only_miR11	synaptic_vesicle_exocytosis	52	3.99483	1.9204	7	0.101703	0.36926
Only_miR11	taxis	33	2.53518	1.52984	5	0.10542	0.380803
Only_miR11	glutamine_family_amino_acid_metabolic_process	24	1.84377	1.30465	4	0.107989	0.388102
Only_miR11	response_to_nutrient_levels	24	1.84377	1.30465	4	0.107989	0.388102
Only_miR11	lipid_modification	24	1.84377	1.30465	4	0.107989	0.388102
Only_miR11	response_to_extracellular_stimulus	24	1.84377	1.30465	4	0.107989	0.388102
Only_miR11	synapse_organization_and_biogenesis	63	4.83989	2.11378	8	0.108665	0.38856
Only_miR11	mushroom_body_development	43	3.30342	1.74632	6	0.109222	0.388589
Only_miR11	extracellular_structure_organization_and_biogenesis	84	6.45319	2.44078	10	0.10998	0.389329
Only_miR11	anion_transport	34	2.612	1.55285	5	0.116201	0.409306
Only_miR11	amine_biosynthetic_process	44	3.38024	1.76651	6	0.118711	0.414028
Only_miR11	RNA_transport	54	4.14848	1.95698	7	0.118305	0.414652
Only_miR11	nucleic_acid_transport	54	4.14848	1.95698	7	0.118305	0.414652
Only_miR11	negative_regulation_of_growth	25	1.92059	1.33156	4	0.121146	0.418398
Only_miR11	actin_polymerization_and/or_depolymerization	25	1.92059	1.33156	4	0.121146	0.418398
Only_miR11	synaptic_growth_at_neuromuscular_junction	25	1.92059	1.33156	4	0.121146	0.418398
Only_miR11	regulation_of_multicellular_organism_growth	25	1.92059	1.33156	4	0.121146	0.418398
Only_miR11	transcription_initiation	75	5.76177	2.30632	9	0.120579	0.418479
Only_miR11	posttranscriptional_regulation_of_gene_expression	108	8.29695	2.76759	12	0.125798	0.432355
Only_miR11	nitrogen_compound_biosynthetic_process	45	3.45706	1.78647	6	0.128595	0.435622
Only_miR11	JNK_cascade	45	3.45706	1.78647	6	0.128595	0.435622
Only_miR11	reproductive_developmental_process	76	5.8386	2.32165	9	0.128003	0.435703
Only_miR11	negative_regulation_of_translation	35	2.68883	1.57552	5	0.127481	0.436022
Only_miR11	branching_morphogenesis_of_a_tube	35	2.68883	1.57552	5	0.127481	0.436022
Only_miR11	cell-cell_junction_assembly_and_maintenance	35	2.68883	1.57552	5	0.127481	0.436022
Only_miR11	protein_processing	35	2.68883	1.57552	5	0.127481	0.436022
Only_miR11	cell_junction_assembly_and_maintenance	35	2.68883	1.57552	5	0.127481	0.436022
Only_miR11	RNA_localization	109	8.37378	2.78037	12	0.132055	0.443104
Only_miR11	oocyte_construction	98	7.52872	2.63635	11	0.131572	0.443586
Only_miR11	multicellular_organism_growth	26	1.99741	1.35793	4	0.134949	0.450679
Only_miR11	lymph_gland_development	26	1.99741	1.35793	4	0.134949	0.450679
Only_miR11	pigment_metabolic_process	56	4.30212	1.99289	7	0.136212	0.452761
Only_miR11	cellular_homeostasis	110	8.4506	2.7931	12	0.138479	0.458147
Only_miR11	imaginal_disc-derived_wing_hair_organization_and_biogenesis	36	2.76565	1.59787	5	0.139238	0.458515
Only_miR11	negative_regulation_of_cellular_biosynthetic_process	36	2.76565	1.59787	5	0.139238	0.458515
Only_miR11	transcription_initiation_from_RNA_polymerase_II_promoter	67	5.14718	2.17985	8	0.14086	0.461707
Only_miR11	hexose_metabolic_process	78	5.99224	2.352	9	0.143556	0.468375
Only_miR11	regulation_of_response_to_stimulus	47	3.61071	1.82574	6	0.149491	0.483286
Only_miR11	segment_polarity_determination	27	2.07424	1.38379	4	0.149354	0.485057
Only_miR11	glycerophospholipid_biosynthetic_process	27	2.07424	1.38379	4	0.149354	0.485057
Only_miR11	non-sensory_hair_organization_and_biogenesis	37	2.84247	1.61991	5	0.151449	0.48739
Only_miR11	hair_cell_differentiation	37	2.84247	1.61991	5	0.151449	0.48739
Only_miR11	protein_import_into_nucleus	58	4.45577	2.02817	7	0.155356	0.497702
Only_miR11	regulation_of_hydrolase_activity	58	4.45577	2.02817	7	0.155356	0.497702
Only_miR11	monosaccharide_metabolic_process	80	6.14589	2.38196	9	0.160013	0.510312
Only_miR11	organic_acid_biosynthetic_process	28	2.15106	1.40919	4	0.164314	0.519349
Only_miR11	carboxylic_acid_biosynthetic_process	28	2.15106	1.40919	4	0.164314	0.519349
Only_miR11	nuclear_import	59	4.53259	2.04558	7	0.165367	0.520354
Only_miR11	regulation_of_RNA_splicing	59	4.53259	2.04558	7	0.165367	0.520354
Only_miR11	regulation_of_nuclear_mRNA_splicing,_via_spliceosome	59	4.53259	2.04558	7	0.165367	0.520354
Only_miR11	tRNA_aminoacylation_for_protein_translation	59	4.53259	2.04558	7	0.165367	0.520354
Only_miR11	tRNA_aminoacylation	59	4.53259	2.04558	7	0.165367	0.520354
Only_miR11	neuromuscular_junction_development	38	2.9193	1.64165	5	0.164088	0.52096
Only_miR11	lipid_catabolic_process	38	2.9193	1.64165	5	0.164088	0.52096
Only_miR11	epidermal_cell_differentiation	39	2.99612	1.66311	5	0.177128	0.55003
Only_miR11	amino_acid_activation	60	4.60942	2.06284	7	0.175655	0.550281
Only_miR11	regulation_of_mRNA_processing	60	4.60942	2.06284	7	0.175655	0.550281
Only_miR11	tube_morphogenesis	93	7.1446	2.56821	10	0.176479	0.550427
Only_miR11	vesicle_docking	29	2.22789	1.43413	4	0.179782	0.555833
Only_miR11	defense_response_to_fungus	29	2.22789	1.43413	4	0.179782	0.555833
Only_miR11	larval_behavior	29	2.22789	1.43413	4	0.179782	0.555833
Only_miR11	membrane_docking	29	2.22789	1.43413	4	0.179782	0.555833
Only_miR11	cell-cell_junction_assembly	29	2.22789	1.43413	4	0.179782	0.555833
Only_miR11	vesicle_docking_during_exocytosis	29	2.22789	1.43413	4	0.179782	0.555833
Only_miR11	regulation_of_protein_import_into_nucleus	29	2.22789	1.43413	4	0.179782	0.555833
Only_miR11	cell_junction_assembly	29	2.22789	1.43413	4	0.179782	0.555833
Only_miR11	acetyl-CoA_catabolic_process	29	2.22789	1.43413	4	0.179782	0.555833
Only_miR11	tricarboxylic_acid_cycle	29	2.22789	1.43413	4	0.179782	0.555833
Only_miR11	negative_regulation_of_programmed_cell_death	50	3.84118	1.88311	6	0.183429	0.564643
Only_miR11	Ras_protein_signal_transduction	94	7.22142	2.58198	10	0.184834	0.566504
Only_miR11	energy_derivation_by_oxidation_of_organic_compounds	40	3.07295	1.6843	5	0.190543	0.581484
Only_miR11	positive_regulation_of_growth	30	2.30471	1.45865	4	0.19571	0.587129
Only_miR11	regulation_of_intracellular_protein_transport	30	2.30471	1.45865	4	0.19571	0.587129
Only_miR11	regulation_of_protein_transport	30	2.30471	1.45865	4	0.19571	0.587129
Only_miR11	aerobic_respiration	30	2.30471	1.45865	4	0.19571	0.587129
Only_miR11	imaginal_disc_growth	30	2.30471	1.45865	4	0.19571	0.587129
Only_miR11	coenzyme_catabolic_process	30	2.30471	1.45865	4	0.19571	0.587129
Only_miR11	oocyte_axis_determination	95	7.29825	2.59568	10	0.193364	0.587561
Only_miR11	protein_depolymerization	20	1.53647	1.19098	3	0.195389	0.588662
Only_miR11	axon_choice_point_recognition	20	1.53647	1.19098	3	0.195389	0.588662
Only_miR11	regulation_of_transcription_factor_import_into_nucleus	20	1.53647	1.19098	3	0.195389	0.588662
Only_miR11	transcription_factor_import_into_nucleus	20	1.53647	1.19098	3	0.195389	0.588662
Only_miR11	regulation_of_alternative_nuclear_mRNA_splicing,_via_spliceosome	51	3.91801	1.90184	6	0.195365	0.591105
Only_miR11	regulation_of_mitosis	41	3.14977	1.70523	5	0.204303	0.610323
Only_miR11	alternative_nuclear_mRNA_splicing,_via_spliceosome	52	3.99483	1.9204	6	0.207582	0.617513
Only_miR11	regulation_of_cell_size	52	3.99483	1.9204	6	0.207582	0.617513
Only_miR11	regulation_of_intracellular_transport	31	2.38153	1.48276	4	0.212047	0.62554
Only_miR11	cellular_respiration	31	2.38153	1.48276	4	0.212047	0.62554
Only_miR11	response_to_fungus	31	2.38153	1.48276	4	0.212047	0.62554
Only_miR11	regulation_of_nucleocytoplasmic_transport	31	2.38153	1.48276	4	0.212047	0.62554
Only_miR11	protein-DNA_complex_assembly	120	9.21884	2.9173	12	0.211328	0.626027
Only_miR11	proximal/distal_pattern_formation,_imaginal_disc	21	1.6133	1.22039	3	0.215824	0.634038
Only_miR11	actin_filament_bundle_formation	21	1.6133	1.22039	3	0.215824	0.634038
Only_miR11	reproductive_behavior	64	4.91671	2.13049	7	0.219323	0.641657
Only_miR11	acetyl-CoA_metabolic_process	32	2.45836	1.50648	4	0.228746	0.66647
Only_miR11	synaptogenesis	43	3.30342	1.74632	5	0.232742	0.675333
Only_miR11	regulation_of_small_GTPase_mediated_signal_transduction	88	6.76048	2.49822	9	0.233862	0.675814
Only_miR11	neuroblast_division	22	1.69012	1.24911	3	0.236674	0.681159
Only_miR11	asymmetric_neuroblast_division	22	1.69012	1.24911	3	0.236674	0.681159
Only_miR11	protein_import	66	5.07036	2.16352	7	0.242476	0.695033
Only_miR11	male_meiosis	33	2.53518	1.52984	4	0.245756	0.698778
Only_miR11	spindle_assembly	33	2.53518	1.52984	4	0.245756	0.698778
Only_miR11	asymmetric_cell_division	55	4.2253	1.97502	6	0.24572	0.701492
Only_miR11	eggshell_chorion_formation	55	4.2253	1.97502	6	0.24572	0.701492
Only_miR11	regulation_of_gene_expression,_epigenetic	101	7.75919	2.6764	10	0.24786	0.701938
Only_miR11	larval_development	67	5.14718	2.17985	7	0.254332	0.717397
Only_miR11	fatty_acid_metabolic_process	56	4.30212	1.99289	6	0.258861	0.724402
Only_miR11	positive_regulation_of_transport	23	1.76694	1.27718	3	0.257847	0.724428
Only_miR11	germarium-derived_oocyte_fate_determination	23	1.76694	1.27718	3	0.257847	0.724428
Only_miR11	synaptic_vesicle_docking_during_exocytosis	23	1.76694	1.27718	3	0.257847	0.724428
Only_miR11	cuticle_pattern_formation	23	1.76694	1.27718	3	0.257847	0.724428
Only_miR11	regulation_of_circadian_rhythm	23	1.76694	1.27718	3	0.257847	0.724428
Only_miR11	proximal/distal_pattern_formation	23	1.76694	1.27718	3	0.257847	0.724428
Only_miR11	oocyte_dorsal/ventral_axis_determination	34	2.612	1.55285	4	0.263031	0.733172
Only_miR11	multicellular_organismal_aging	80	6.14589	2.38196	8	0.271357	0.753415
Only_miR11	aging	80	6.14589	2.38196	8	0.271357	0.753415
Only_miR11	determination_of_adult_life_span	80	6.14589	2.38196	8	0.271357	0.753415
Only_miR11	instar_larval_development	46	3.53389	1.80621	5	0.27725	0.763785
Only_miR11	cytoskeleton-dependent_intracellular_transport	104	7.98966	2.71585	10	0.276923	0.765865
Only_miR11	oocyte_fate_determination	24	1.84377	1.30465	3	0.279256	0.76633
Only_miR11	phosphoinositide_biosynthetic_process	24	1.84377	1.30465	3	0.279256	0.76633
Only_miR11	germarium-derived_oocyte_differentiation	24	1.84377	1.30465	3	0.279256	0.76633
Only_miR11	regulation_of_cell_growth	24	1.84377	1.30465	3	0.279256	0.76633
Only_miR11	cellular_protein_complex_assembly	81	6.22271	2.3968	8	0.282622	0.772572
Only_miR11	secondary_metabolic_process	81	6.22271	2.3968	8	0.282622	0.772572
Only_miR11	anatomical_structure_homeostasis	70	5.37765	2.22812	7	0.290831	0.791954
Only_miR11	cell_growth	47	3.61071	1.82574	5	0.292459	0.793337
Only_miR11	dorsal/ventral_axis_specification	59	4.53259	2.04558	6	0.29928	0.805667
Only_miR11	mating_behavior	59	4.53259	2.04558	6	0.29928	0.805667
Only_miR11	behavioral_interaction_between_organisms	59	4.53259	2.04558	6	0.29928	0.805667
Only_miR11	regulation_of_cell_cycle_process	59	4.53259	2.04558	6	0.29928	0.805667
Only_miR11	regulation_of_developmental_growth	36	2.76565	1.59787	4	0.298181	0.805772
Only_miR11	germ-line_stem_cell_division	25	1.92059	1.33156	3	0.300816	0.806734
Only_miR11	cytokinesis_during_cell_cycle	25	1.92059	1.33156	3	0.300816	0.806734
Only_miR11	regulation_of_pole_plasm_oskar_mRNA_localization	25	1.92059	1.33156	3	0.300816	0.806734
Only_miR11	gland_morphogenesis	48	3.68753	1.84506	5	0.307806	0.822365
Only_miR11	salivary_gland_morphogenesis	48	3.68753	1.84506	5	0.307806	0.822365
Only_miR11	pigmentation	60	4.60942	2.06284	6	0.313016	0.833141
Only_miR11	interphase	37	2.84247	1.61991	4	0.315967	0.837845
Only_miR11	interphase_of_mitotic_cell_cycle	37	2.84247	1.61991	4	0.315967	0.837845
Only_miR11	reproductive_behavior_in_a_multicellular_organism	49	3.76436	1.86418	5	0.323262	0.850816
Only_miR11	mitotic_cell_cycle,_embryonic	26	1.99741	1.35793	3	0.322451	0.851848
Only_miR11	polyol_metabolic_process	26	1.99741	1.35793	3	0.322451	0.851848
Only_miR11	stem_cell_division	26	1.99741	1.35793	3	0.322451	0.851848
Only_miR11	mesoderm_formation	26	1.99741	1.35793	3	0.322451	0.851848
Only_miR11	regulation_of_Ras_protein_signal_transduction	73	5.60813	2.27537	7	0.328407	0.861156
Only_miR11	pole_plasm_assembly	50	3.84118	1.88311	5	0.338799	0.885128
Only_miR11	fatty_acid_biosynthetic_process	27	2.07424	1.38379	3	0.344088	0.895641
Only_miR11	cellular_lipid_catabolic_process	27	2.07424	1.38379	3	0.344088	0.895641
Only_miR11	mesoderm_morphogenesis	27	2.07424	1.38379	3	0.344088	0.895641
Only_miR11	germ_cell_migration	39	2.99612	1.66311	4	0.351744	0.912216
Only_miR11	regulation_of_mitotic_cell_cycle	88	6.76048	2.49822	8	0.364115	0.940853
Only_miR11	cellular_protein_complex_disassembly	28	2.15106	1.40919	3	0.365661	0.941411
Only_miR11	protein_complex_disassembly	28	2.15106	1.40919	3	0.365661	0.941411
Only_miR11	formation_of_primary_germ_layer	28	2.15106	1.40919	3	0.365661	0.941411
Only_miR11	establishment_and/or_maintenance_of_cytoskeleton_polarity	28	2.15106	1.40919	3	0.365661	0.941411
Only_miR11	establishment_and/or_maintenance_of_microtubule_cytoskeleton_polarity	28	2.15106	1.40919	3	0.365661	0.941411
Only_miR11	oocyte_microtubule_cytoskeleton_organization	28	2.15106	1.40919	3	0.365661	0.941411
Only_miR11	apical_junction_assembly	28	2.15106	1.40919	3	0.365661	0.941411
Only_miR11	regulation_of_synapse_structure_and_activity	40	3.07295	1.6843	4	0.369656	0.948247
Only_miR11	microtubule-based_movement	101	7.75919	2.6764	9	0.372438	0.951934
Only_miR11	ATP_biosynthetic_process	89	6.8373	2.51238	8	0.375992	0.957561
Only_miR11	mitochondrion_organization_and_biogenesis	77	5.91542	2.33687	7	0.379474	0.962966
Only_miR11	mating	65	4.99354	2.14707	6	0.382765	0.96785
Only_miR11	oocyte_anterior/posterior_axis_determination	65	4.99354	2.14707	6	0.382765	0.96785
Only_miR11	ATP_metabolic_process	90	6.91413	2.52645	8	0.387891	0.973855
Only_miR11	hormone_metabolic_process	29	2.22789	1.43413	3	0.387109	0.975348
Only_miR11	macromolecular_complex_disassembly	29	2.22789	1.43413	3	0.387109	0.975348
Only_miR11	locomotion	29	2.22789	1.43413	3	0.387109	0.975348
Only_miR11	cellular_macromolecular_complex_disassembly	29	2.22789	1.43413	3	0.387109	0.975348
Only_miR11	cell-cell_adhesion	66	5.07036	2.16352	6	0.396794	0.992687
Only_miR11	mRNA_transport	22	1.69012	1.24911	1	0.827709	1
Only_miR11	cell_cycle_checkpoint	23	1.76694	1.27718	2	0.536516	1
Only_miR11	purine_ribonucleoside_triphosphate_biosynthetic_process	93	7.1446	2.56821	8	0.423621	1
Only_miR11	negative_regulation_of_gene_expression,_epigenetic	38	2.9193	1.64165	2	0.800408	1
Only_miR11	microtubule_organizing_center_organization_and_biogenesis	53	4.07165	1.93878	4	0.588646	1
Only_miR11	imaginal_disc-derived_leg_morphogenesis	30	2.30471	1.45865	3	0.408375	1
Only_miR11	nuclear_organization_and_biogenesis	31	2.38153	1.48276	3	0.42941	1
Only_miR11	posttranscriptional_gene_silencing	35	2.68883	1.57552	2	0.761534	1
Only_miR11	chitin-based_cuticle_development	38	2.9193	1.64165	2	0.800408	1
Only_miR11	stem_cell_differentiation	31	2.38153	1.48276	3	0.42941	1
Only_miR11	DNA_recombination	39	2.99612	1.66311	2	0.812057	1
Only_miR11	glial_cell_migration	21	1.6133	1.22039	1	0.813371	1
Only_miR11	biogenic_amine_metabolic_process	31	2.38153	1.48276	2	0.699618	1
Only_miR11	multicellular_organism_reproduction	57	4.37895	2.01061	5	0.447647	1
Only_miR11	electron_transport_chain	74	5.68495	2.2909	1	0.997302	1
Only_miR11	mRNA_catabolic_process	23	1.76694	1.27718	1	0.840945	1
Only_miR11	embryonic_organ_development	43	3.30342	1.74632	2	0.852787	1
Only_miR11	nuclear_transport	92	7.06777	2.55437	8	0.411717	1
Only_miR11	regulation_of_tube_size,_open_tracheal_system	21	1.6133	1.22039	0	1	1
Only_miR11	molting_cycle	48	3.68753	1.84506	2	0.892317	1
Only_miR11	syncytium_formation_by_plasma_membrane_fusion	23	1.76694	1.27718	1	0.840945	1
Only_miR11	pole_cell_migration	20	1.53647	1.19098	1	0.797841	1
Only_miR11	stem_cell_maintenance	31	2.38153	1.48276	3	0.42941	1
Only_miR11	rRNA_metabolic_process	35	2.68883	1.57552	3	0.510402	1
Only_miR11	amino_sugar_metabolic_process	105	8.06648	2.72888	8	0.562212	1
Only_miR11	embryonic_gut_morphogenesis	25	1.92059	1.33156	2	0.582433	1
Only_miR11	chromatin_remodeling	67	5.14718	2.17985	6	0.410807	1
Only_miR11	male_courtship_behavior	28	2.15106	1.40919	2	0.64484	1
Only_miR11	lipoprotein_biosynthetic_process	29	2.22789	1.43413	2	0.663931	1
Only_miR11	mitotic_sister_chromatid_segregation	46	3.53389	1.80621	0	1	1
Only_miR11	axon_extension	23	1.76694	1.27718	1	0.840945	1
Only_miR11	muscle_attachment	20	1.53647	1.19098	1	0.797841	1
Only_miR11	gene_silencing_by_RNA	35	2.68883	1.57552	2	0.761534	1
Only_miR11	maintenance_of_protein_location	33	2.53518	1.52984	1	0.928485	1
Only_miR11	cellular_polysaccharide_metabolic_process	111	8.52742	2.80576	6	0.862789	1
Only_miR11	response_to_temperature_stimulus	63	4.83989	2.11378	4	0.72275	1
Only_miR11	steroid_metabolic_process	30	2.30471	1.45865	2	0.682185	1
Only_miR11	cellular_carbohydrate_catabolic_process	62	4.76307	2.09694	2	0.95663	1
Only_miR11	glucose_catabolic_process	41	3.14977	1.70523	1	0.962271	1
Only_miR11	ATP_synthesis_coupled_proton_transport	68	5.22401	2.19606	3	0.902217	1
Only_miR11	chitin_metabolic_process	95	7.29825	2.59568	5	0.862903	1
Only_miR11	response_to_oxidative_stress	50	3.84118	1.88311	3	0.749288	1
Only_miR11	transmembrane_transport	83	6.37636	2.42621	6	0.620995	1
Only_miR11	molting_cycle,_protein-based_cuticle	48	3.68753	1.84506	2	0.892317	1
Only_miR11	nucleosome_assembly	24	1.84377	1.30465	1	0.853164	1
Only_miR11	nuclear_migration	21	1.6133	1.22039	2	0.487229	1
Only_miR11	cell_projection_biogenesis	71	5.45448	2.24398	4	0.804341	1
Only_miR11	sister_chromatid_segregation	47	3.61071	1.82574	0	1	1
Only_miR11	ATP_synthesis_coupled_electron_transport	68	5.22401	2.19606	0	1	1
Only_miR11	nucleoside_metabolic_process	21	1.6133	1.22039	0	1	1
Only_miR11	sulfur_compound_biosynthetic_process	20	1.53647	1.19098	2	0.461381	1
Only_miR11	myoblast_maturation	37	2.84247	1.61991	1	0.948056	1
Only_miR11	energy_coupled_proton_transport,_down_electrochemical_gradient	68	5.22401	2.19606	3	0.902217	1
Only_miR11	nucleoside_monophosphate_biosynthetic_process	23	1.76694	1.27718	0	1	1
Only_miR11	N-acetylglucosamine_metabolic_process	104	7.98966	2.71585	8	0.551151	1
Only_miR11	cuticle_development	61	4.68624	2.07996	5	0.50793	1
Only_miR11	skeletal_muscle_development	95	7.29825	2.59568	7	0.601131	1
Only_miR11	translational_elongation	20	1.53647	1.19098	1	0.797841	1
Only_miR11	memory	35	2.68883	1.57552	3	0.510402	1
Only_miR11	ribonucleoside_monophosphate_biosynthetic_process	21	1.6133	1.22039	0	1	1
Only_miR11	gonad_development	29	2.22789	1.43413	1	0.901541	1
Only_miR11	establishment_of_organelle_localization	69	5.30083	2.21215	6	0.438716	1
Only_miR11	nuclear_export	29	2.22789	1.43413	0	1	1
Only_miR11	regulation_of_synaptogenesis	22	1.69012	1.24911	1	0.827709	1
Only_miR11	regulation_of_Rho_protein_signal_transduction	25	1.92059	1.33156	2	0.582433	1
Only_miR11	nucleoside_monophosphate_metabolic_process	23	1.76694	1.27718	0	1	1
Only_miR11	neuropeptide_signaling_pathway	34	2.612	1.55285	2	0.747183	1
Only_miR11	embryonic_ectodermal_gut_morphogenesis	25	1.92059	1.33156	2	0.582433	1
Only_miR11	cytokinesis	72	5.5313	2.25973	6	0.480053	1
Only_miR11	eye_pigment_metabolic_process	28	2.15106	1.40919	2	0.64484	1
Only_miR11	maintenance_of_location_in_cell	30	2.30471	1.45865	1	0.909105	1
Only_miR11	embryonic_organ_morphogenesis	25	1.92059	1.33156	2	0.582433	1
Only_miR11	centrosome_duplication	21	1.6133	1.22039	1	0.813371	1
Only_miR11	chromatin_assembly	66	5.07036	2.16352	4	0.75596	1
Only_miR11	vesicle_organization_and_biogenesis	29	2.22789	1.43413	2	0.663931	1
Only_miR11	alcohol_catabolic_process	45	3.45706	1.78647	1	0.972596	1
Only_miR11	nucleoside_triphosphate_metabolic_process	96	7.37507	2.60931	8	0.459172	1
Only_miR11	proteolysis_involved_in_cellular_protein_catabolic_process	110	8.4506	2.7931	5	0.931243	1
Only_miR11	intracellular_mRNA_localization	60	4.60942	2.06284	5	0.493088	1
Only_miR11	RNA_interference	26	1.99741	1.35793	2	0.604098	1
Only_miR11	maintenance_of_protein_location_in_cell	29	2.22789	1.43413	1	0.901541	1
Only_miR11	chromatin_silencing	38	2.9193	1.64165	2	0.800408	1
Only_miR11	courtship_behavior	42	3.22659	1.7259	4	0.405337	1
Only_miR11	cytoplasm_organization_and_biogenesis	57	4.37895	2.01061	5	0.447647	1
Only_miR11	muscle_fiber_development	81	6.22271	2.3968	7	0.430792	1
Only_miR11	molting_cycle,_chitin-based_cuticle	43	3.30342	1.74632	2	0.852787	1
Only_miR11	nuclear-transcribed_mRNA_catabolic_process	22	1.69012	1.24911	1	0.827709	1
Only_miR11	DNA-dependent_DNA_replication	58	4.45577	2.02817	5	0.462929	1
Only_miR11	embryonic_gut_development	26	1.99741	1.35793	2	0.604098	1
Only_miR11	molting_cycle_process	26	1.99741	1.35793	2	0.604098	1
Only_miR11	calcium-dependent_cell-cell_adhesion	21	1.6133	1.22039	1	0.813371	1
Only_miR11	aromatic_compound_metabolic_process	79	6.06907	2.36703	5	0.734887	1
Only_miR11	pole_plasm_mRNA_localization	43	3.30342	1.74632	4	0.423039	1
Only_miR11	posttranscriptional_gene_silencing_by_RNA	35	2.68883	1.57552	2	0.761534	1
Only_miR11	gut_morphogenesis	43	3.30342	1.74632	4	0.423039	1
Only_miR11	coenzyme_biosynthetic_process	38	2.9193	1.64165	2	0.800408	1
Only_miR11	meiosis_I	44	3.38024	1.76651	4	0.440607	1
Only_miR11	GPI_anchor_metabolic_process	23	1.76694	1.27718	2	0.536516	1
Only_miR11	single_fertilization	20	1.53647	1.19098	2	0.461381	1
Only_miR11	ribonucleoside_triphosphate_biosynthetic_process	94	7.22142	2.58198	8	0.435504	1
Only_miR11	ribonucleoside_monophosphate_metabolic_process	21	1.6133	1.22039	0	1	1
Only_miR11	sensory_perception_of_taste	64	4.91671	2.13049	0	1	1
Only_miR11	cofactor_metabolic_process	101	7.75919	2.6764	8	0.517311	1
Only_miR11	eye_pigmentation	37	2.84247	1.61991	3	0.548553	1
Only_miR11	nucleus_localization	27	2.07424	1.38379	2	0.624899	1
Only_miR11	leg_disc_morphogenesis	32	2.45836	1.50648	3	0.450169	1
Only_miR11	response_to_DNA_damage_stimulus	102	7.83601	2.68961	8	0.528694	1
Only_miR11	monosaccharide_catabolic_process	41	3.14977	1.70523	1	0.962271	1
Only_miR11	hexose_catabolic_process	41	3.14977	1.70523	1	0.962271	1
Only_miR11	centrosome_cycle	41	3.14977	1.70523	3	0.619303	1
Only_miR11	DNA_replication	98	7.52872	2.63635	8	0.48264	1
Only_miR11	embryonic_digestive_tract_morphogenesis	25	1.92059	1.33156	2	0.582433	1
Only_miR11	nucleoside_triphosphate_biosynthetic_process	94	7.22142	2.58198	8	0.435504	1
Only_miR11	transmembrane_ion_transport	69	5.30083	2.21215	3	0.907499	1
Only_miR11	purine_nucleotide_biosynthetic_process	115	8.83472	2.85587	9	0.526866	1
Only_miR11	fertilization	21	1.6133	1.22039	2	0.487229	1
Only_miR11	amino_acid_derivative_metabolic_process	51	3.91801	1.90184	4	0.557684	1
Only_miR11	reproductive_process_in_a_multicellular_organism	57	4.37895	2.01061	5	0.447647	1
Only_miR11	regulation_of_Rab_protein_signal_transduction	25	1.92059	1.33156	2	0.582433	1
Only_miR11	myoblast_development	37	2.84247	1.61991	1	0.948056	1
Only_miR11	mitochondrial_transport	47	3.61071	1.82574	3	0.710465	1
Only_miR11	circadian_behavior	38	2.9193	1.64165	3	0.566958	1
Only_miR11	germ-line_stem_cell_maintenance	24	1.84377	1.30465	2	0.559904	1
Only_miR11	embryonic_ectodermal_gut_development	25	1.92059	1.33156	2	0.582433	1
Only_miR11	rhythmic_behavior	41	3.14977	1.70523	3	0.619303	1
Only_miR11	nitrogen_compound_catabolic_process	35	2.68883	1.57552	3	0.510402	1
Only_miR11	pigmentation_during_development	57	4.37895	2.01061	5	0.447647	1
Only_miR11	response_to_organic_substance	31	2.38153	1.48276	2	0.699618	1
Only_miR11	myoblast_differentiation	38	2.9193	1.64165	1	0.952047	1
Only_miR11	ribonucleotide_metabolic_process	119	9.14201	2.90511	9	0.568856	1
Only_miR11	plasma_membrane_fusion	23	1.76694	1.27718	1	0.840945	1
Only_miR11	purine_nucleotide_metabolic_process	117	8.98837	2.8806	9	0.548052	1
Only_miR11	polysaccharide_metabolic_process	111	8.52742	2.80576	6	0.862789	1
Only_miR11	sensory_perception_of_smell	70	5.37765	2.22812	5	0.632001	1
Only_miR11	sex_differentiation	58	4.45577	2.02817	4	0.660169	1
[truncated: 1,541 more rows]
