# Supplementary material for: An Intronic microRNA Links Rb/E2F and EGFR Signaling
Source: PLoS Genet. 2014 Jul 24;10(7):e1004493. doi: 10.1371/journal.pgen.1004493 (PMC4109884; doi:10.1371/journal.pgen.1004493)
Supplement: Table S3 — Compiled list of genes related to EGFR pathway. (XLSX) [file pgen.1004493.s007.xlsx]

## Sheet: Table S3 - EGFR genes
FB ID	symbol	gene	Reference	Reference	Reference	AmiGO	http://amigo.geneontology.org/cgi-bin/amigo/term-assoc.cgi?term=GO:0007173&session_id=1529amigo1383236562&page=2
FBgn0000097	aop	anterior open	AmiGO	KEGG		GO_0045741	positive regulation of EGF-activated receptor activity
FBgn0004569	aos	argos			Moses, 2002	GO_0042058	regulation of EGFR signaling pathway
FBgn0029095	aru	arouser	AmiGO			GO_0045742	positive regulation of EGFR signaling pathway
FBgn0015905	ast	asteroid	AmiGO			GO_0007175	negative regulation of EGF-activated receptor activity
FBgn0010433	ato	atonal	AmiGO			GO_0042059	negative regulation of EGFR signaling pathway
FBgn0050476	ave	aveugle	AmiGO			GO_0007173	EGFR signaling pathway
FBgn0042085	Bap170	Brahma associated protein 170kD	AmiGO			GO_0008314	gurken receptor signaling pathway
FBgn0000206	Boss	bride of sevenless		KEGG
FBgn0000212	brm	brahma	AmiGO			KEGG Pathway: MAPK signaling pathway - fly (dme04013)					http://www.genome.jp/kegg-bin/show_pathway?dme04013
FBgn0000221	brn	brainiac	AmiGO
FBgn0020224	Cbl	Cbl	AmiGO
FBgn0029791	CG4096	CG4096	AmiGO
FBgn0000339	cni	cornichon	AmiGO
FBgn0000382	csw	corkscrew	AmiGO	KEGG
FBgn0086901	cv-c	crossveinless c	AmiGO
FBgn0015379	dod	dodo	AmiGO
FBgn0016794	dos	daughter of sevenless			Moses, 2002
FBgn0004638	drk	downstream of receptor kinase	AmiGO	KEGG	Moses, 2002
FBgn0010269	Dsor1	Downstream of raf1	AmiGO	KEGG
FBgn0000591	E(spl)m8-HLH	Enhancer of split m8, helix-loop-helix	AmiGO
FBgn0263933	ebi	ebi	AmiGO
FBgn0000547	ed	echinoid	AmiGO
FBgn0023214	edl	ETS-domain lacking	AmiGO
FBgn0003731	Egfr	Epidermal growth factor receptor	AmiGO	KEGG
FBgn0000635	Fas2	Fasciclin 2	AmiGO
FBgn0051774	fred	friend of echinoid	AmiGO
FBgn0023441	fus	fusilli	AmiGO
FBgn0004390	Gap1	GTPase-activating protein 1		KEGG
FBgn0033081	geminin	geminin	AmiGO
FBgn0001137	grk	gurken	AmiGO	KEGG
FBgn0010825	Gug	Grunge	AmiGO
FBgn0010303	hep	hemipterous (a MAPKK)	AmiGO
FBgn0032250	holn1	hole-in-one	AmiGO
FBgn0263395	hppy	happyhour	AmiGO
FBgn0031450	Hrs	Hepatocyte growth factor regulated tyrosine kinase substrate	AmiGO
FBgn0015399	kek1	kekkon-1	AmiGO
FBgn0052179	Krn	Keren	AmiGO
FBgn0002736	mago	mago nashi	AmiGO
FBgn0036448	mop	myopic	AmiGO
FBgn0026252	msk	moleskin	AmiGO
FBgn0264975	Nrg	Neuroglian	AmiGO
FBgn0261885	osa	osa	AmiGO
FBgn0003079	phl	pole hole	AmiGO	KEGG
FBgn0013725	phyl				Moses, 2002
FBgn0003118	pnt	pointed	AmiGO	KEGG
FBgn0003165	pum	pumilio	AmiGO
FBgn0010333	Rac1	Rac1			Moses, 2002
FBgn0003205	Ras85D	Ras oncogene at 85D		KEGG
FBgn0039055	rassf				Moses, 2002
FBgn0004635	rho	rhomboid	AmiGO
FBgn0041723	rho-5	rhomboid-5	AmiGO
FBgn0014020	Rho1	Rho1	AmiGO
FBgn0025836	RhoGAP1A				Moses, 2002
FBgn0026375	RhoGAPp190				Moses, 2002
FBgn0003256	rl	rolled	AmiGO	KEGG
FBgn0035106	rno	rhinoceros	AmiGO
FBgn0003295	ru	roughoid	AmiGO
FBgn0003310	S	Star	AmiGO
FBgn0002573	sens	senseless	AmiGO
FBgn0003366	sev	sevenless		KEGG
FBgn0015296	Shc	SHC-adaptor protein	AmiGO
FBgn0003410	sina				Moses, 2002
FBgn0259794	sinah				Moses, 2002
FBgn0003416	sl	small wing	AmiGO
FBgn0263865	Smr				Moses, 2002
FBgn0005410	sno	strawberry notch	AmiGO
FBgn0041184	Socs36E	Suppressor of cytokine signaling at 36E	AmiGO
FBgn0033266	Socs44A	Suppressor of Cytokine Signaling at 44A	AmiGO
FBgn0001965	Sos	Son of sevenless		KEGG
FBgn0016977	spen	split ends	AmiGO
FBgn0005672	spi	spitz	AmiGO
FBgn0264959	Src42A	Src oncogene at 42A	AmiGO
FBgn0020248	stet	stem cell tumor	AmiGO
FBgn0014388	sty	sprouty	AmiGO
FBgn0040271	Sulf1	Sulfated	AmiGO
FBgn0003651	svp	sevenup			Moses, 2002
FBgn0033378	tsu	tsunagi	AmiGO
FBgn0003870	ttk	tramtrack			Moses, 2002
FBgn0003984	vn	vein	AmiGO
FBgn0015279	Pi3K92E		AmiGO
