# Supplementary material for: An Intronic microRNA Links Rb/E2F and EGFR Signaling
Source: PLoS Genet. 2014 Jul 24;10(7):e1004493. doi: 10.1371/journal.pgen.1004493 (PMC4109884; doi:10.1371/journal.pgen.1004493)
Supplement: Table S4 — Sequence of miRNA-expressing constructs. (XLSX) [file pgen.1004493.s008.xlsx]

## Sheet: Table S4 miRNA insert seq
miRNA	construct	gene fragment used	insert sequence
hsa-mir-29a	pcDNA3/mir-29a	Bam HI - mir-29a - Not I	GATCGGATCCACTCATTCCATTGTGCCTGGGTTAAAGAGCCCAATGTATGCTGGATTTAGTAAGATTTGGGCCCTCCCAACCCTCACGACCTTCTGTGACCCCTTAGAGGATGACTGATTTCTTTTGGTGTTCAGAGTCAATATAATTTTCTAGCACCATCTGAAATCGGTTATAATGATTGGGGAAGAGCACCATGATGCTGACTGCTGAGAGGAAATGTATTGGTGACCGTTGGGGCCATGGACAAGAACTAAGAAAACAAATGCAAAGCAAGCGGCCGCATCGATCG
dme-mir-998	pcDNA3/mir-998	Bam HI - mir-998 - Not I	ACCACCCAACCGACAACCCtatatataacatttatcattgtgtttcattcacaacttttactttcacactgtgctaacaacgaaacggtaaccatatactaataatattaaataattgtgcataaatgtatatatgtatatatatcgacataaaacccgccgcctcgtcagcaatcgtcctcgtgtcaaattcattttggaactgaattctcgtgggtctgcactgacaacactgaccgctccagggcaaattgttcattttgaaattgaaattctgtagcaccatgagattcagctctggcgtgaatttcaaacatgcatccacaacatctctcgctctatcagctctcagctctctctctctctctctcctattttatggttgtccagatgaaatcg…
dme-mir-998	pUAST/mir-998	de2f1 intron 5 mir-11[mir1/mCherry shmiR] mir-998 [mir1/998]	ctgcaaccgcccgccgaacattcattcatgatcattttgcatccgcctgtaactctttttgtagtaaatatttaaagatacgcagctaactgaggtgcctacgatgcatttagatctatgtgaggcttcagccaagcttagtCGGCTCCAAGCCCTACGTGTATagttatattcaagcataTTCACGTAGGCCTTGGAGCCGGcggatccaggcgagagaaatcctcgaagcaacattaagcgaaatcatgggtcgattccaaaaaagaacctatatttattttaaatttttcaatttgtttaatttgtttaatttttacaacctttcggccaacgagaatcagttcaaaattgccaatttgattttattttcatttgcgtttaatcgatttcctaact…
