# Supplementary material for: An Intronic microRNA Links Rb/E2F and EGFR Signaling
Source: PLoS Genet. 2014 Jul 24;10(7):e1004493. doi: 10.1371/journal.pgen.1004493 (PMC4109884; doi:10.1371/journal.pgen.1004493)
Supplement: Table S5 — Primers sequence used in this study. (XLSX) [file pgen.1004493.s009.xlsx]

## Sheet: Table S5 oligo sequences
purpose of oligo	oligo name	sequence
pcDNA3/mir-998	Bam HI mir-998 F	gatcGGATCCaccacccaaccgacaaccc
pcDNA3/mir-998	Not I mir-998 R	GATCgcggccgcTGGGCTGGCTGCATATGA
Generation of mir-998 mutant	exon5F1	CTTGAGCAGCTAAGCGCCTA
Generation of mir-998 mutant	exon6R1	TGGGCTGGCTGCATATGA
Generation of mir-998 mutant	XP	CGACGGGSCCACCTTATGTTATTTC
Generation of mir-998 mutant	d01508F	TGAGCTGTGAGATGAGCATACTTGGC
Generation of mir-998 mutant	d01508R	CGAATGACTGCTATTCACCGTATCG
qRT-PCR	CblS-F	CCATCGAGCACATGCATAAC
qRT-PCR	CblS-R	CAGAGGAAGCGATAGCCAAC
qRT-PCR	cblL-F	TCCGGCGGAAACTATAAGTG
qRT-PCR	cblL-R	GTTGCGTGTAATGGGAGGAT
qRT-PCR	Rp49-F	TACAGGCCCAAGATCGTGAAG
qRT-PCR	Rp49-R	GACGCACTCTGTTGTCGATACC
qRT-PCR	E2F1 exon1 FWD	TAAGAGTCAGGCGGAGAA
qRT-PCR	E2F1 exon1 REV	CTGCTGTTGCTGTTGTTG
qRT-PCR	tubulin F	acatcccgccccgtggtc
qRT-PCR	tubulin R	agaaagccttgcgcctgaacatag
qRT-PCR	de2f15-6F	TACAGCCATGACCGCAAC
qRT-PCR	de2f15-6R	GTTCAGCGCATACGGATAGTC
