# Supplementary material for: An Intronic microRNA Links Rb/E2F and EGFR Signaling
Source: PLoS Genet. 2014 Jul 24;10(7):e1004493. doi: 10.1371/journal.pgen.1004493 (PMC4109884; doi:10.1371/journal.pgen.1004493)
Supplement: Table S6 — Sequence inserted in 3′UTR luciferase sensor reporters. (XLSX) [file pgen.1004493.s010.xlsx]

## Sheet: Table S6 3'UTR sensors
rpr 3'UTR	TCGCAAGCCATCGCAATGAGGATTCGAGTAACTAACAAATACGGGGAAAACCAATAGTCCAGTCCAAAATCCAGAGTACAAAGGAAATAAGCATGAGCCAACCCAAAACCCAAACACAGTCACCACTCATCAGCCGACGGCACTCGATTTCTACTGCAGTCAAGGACACAGAGCCACAACACCCACCCAATTTTAGTTTACTCATCAAAGCGATTGTGATAATGGTTTTGTTTCTACAAAAAAGCGGAGGAAAAATTTGAAAAAATAACGTTTTTATAAAGTCCCCAATTTTTTACAAAAATGTTTCAATGATATAAATCAACTTTTTTAGAAATAATTTACTCTTAAAGCCTATTTAAATGAATTACTACTGTAATAGTTTGTAAGTTCTTTTGTAAG…
hid 3' UTR	CTTTGCGGCGCGATGAAAGCGCAGGAGACGTGTAATCGAATGATCTATAGTGAAATCAGCTAGCCCTTAAGATATATGCCGATCTAAACATAGTTGTAGTTAAACCGTACATAAGTGCAACGAATTTATTGAACTGCAGGAGCGAAAGCAGAAAGTCATTAATTCGTAAACGGATTGTTAGATACACAAACAGCCAACATACACGAAGAGTGTGCCTAAGATTAAGAAGGTTGACGGGACACAAGAACAATATATTCTATCTGTCTATGGTAACTGCATTTGTATTTCTAAAACGAAACGAAAGATAACAATCTTAACTGCTCAAAGTAATGAAAACTCTTAGACTGGCAAGAGACTCAAATCACACTTATTTTTTTGCTGATCCATATTTTTGTACAA…
dCbl CDS (site 1)	CTCGGAAGCCTGCGTCTCGCAGCGTCTGTCCACCGACAAGAAGACGCTGGAGAAGACCTGGAAGTTGATGGACAAGGTGGTCAAACTGTGCCAGCAGCCGAAGATGAATCTTAAGAATAG
dCbl CDS (site 1 mut)	CTCGGAAGCCTGCGTCTCGCAGCGTCTGTCCACCGACAActAGACGgaGcAGAAcACgaGGAtGTactTGGAgAtGcaGcagtAACTGTGCCAGCAGCCGAAGATGAATCTTAAGAATAG
dCbl-L CDS (site 2)	GGCCGAAGATTTGATGCGACAGCAGCTCATAGCAACTAGTACCACATCGCCGGTGCTCTCTCTCTTGGATGAGGACATCGTTGAGGTGGGTC
dCbl-L CDS (site 2 mut)	GGCCGAAGATTTGATGCGACAGCAGCTCATAGCAACTTGTACCACAAGCCCACTCGCCTCTCTCTTGGATGAGGACATCGTTGAGGTGGGTC
c-Cbl CDS (site 1)	ACCCGCCGGGGACGGTGGACAAGAAGATGGTGGAGAAGTGCTGGAAGCTCATGGACAAGGTGGTGCGGTTGTGTCAGAACCCAAAGCTGGC
c-Cbl CDS (site 1 mut)	CCACCACCTCAGCCCCCACCCGCCGGGGACGGTGGACAAGttGATGGaGGAGAAcacgaGGAtGgTCtaGGtgtAGGaccacCGGTTGTGTCAGAACCCAAAGCTGGCGCTAAAGAATAG
c-Cbl 3'UTR-1 (site 2)	AGGTATCTGCCAGCATTCAAGGTTTTGGATCATTTCATGAGGATCTTTCCTTTGACTGGGTGCTGTGAGGACACACCTGGGTCTGTGCCTGAGATTGCCAGGC
	AGGTATCTGCCAGCATTCAAGGTTTTGGATCATTTCATGAGGAagTTTCCaaaGtCTGccacgaGTGAGGACACACCTGGGTCTGTGCCTGAGATTGCCAGGC
c-Cbl 3'UTR-2 (site 3)	TCCATGGCGAGTCAGGTGTCCATGGCGAGTCAGGTGGGGAGCACGGGTGGAAGGGCCGGCTGTTGACAGACAGACTAAGCTGTGTGGTGCTCTTGCCGCCCCTTCCTGGGTACAGAGCTTGAGAAAAATGCAGCCGACCACTCCCTGTGTTTGTACAGAGCAAAGCCCAAAAGCCAACCTCAGATCTCCTGATTTGGCAGCTGAAGAAATCAGCAGAGTCCTGATTGCCTGATTCAGTCCCAAAAATGAATGTCAGGCCCCGCCCCCTCCCCACCAACATTGCCTCTCCTACATTCTCCTTCTGCCCCTAAATCAGACAGGAGGCCAGAGAGGAGTATTGCTCAATGCGTGCTATGTGCAACTCCTCAGGCCTTGTGCCACCTCCATGCTGAGCCCTGA…
